# Supplementary material for: Distinct immune responses associated with vaccination status and protection outcomes after malaria challenge
Source: PLoS Pathog. 2023 May 17;19(5):e1011051. doi: 10.1371/journal.ppat.1011051 (PMC10228810; doi:10.1371/journal.ppat.1011051)
Supplement: S2 Data — (XLSX) [file ppat.1011051.s004.xlsx]

## Sheet: S2 Data - GSEA results
S2 Data. Gene set enrichment analysis (GSEA) output from the whole blood RNAseq data.
	pathway	pval	padj	ES	NES	nMoreExtreme	size	leadingEdge	TIME	PROT
1	LI.M4.0_cell cycle and transcription	0.000191131	0.00148622	-0.456501	-2.14758	0	320	CENPA, CENPI, E2F7, RAD51, CDKN3, NCAPG, HMMR, ANLN, TTK, DLGAP5, SPC24, ERCC6L, KIF18A, SHCBP1, NUF2, PARPBP, KIF15, ZWINT, UBE2C, ASPM, E2F8, CEP55, CCNE2, APITD1, CKAP2L, APOBEC3B, HJURP, BUB1B, KIFC1, GGH, NEK2, ORC1, SKA1, FAM83D, KIAA1524, IRAK3, CCNA2, UBE2T, CDC45, CDCA2, SPAG5, CENPF, NCAPH, AURKA, CDK1, CHAC2, BUB1, TOP2A, KIAA0101, PRIM1, PLK1, OIP5, DEPDC1B, CENPE, GINS2, POLQ, SUV39H…	C0vsB0	Protected
2	LI.M4.1_cell cycle (I)	0.000191424	0.00148622	-0.66425	-2.82619	0	139	CENPA, CENPI, E2F7, RAD51, CDKN3, NCAPG, ANLN, TTK, DLGAP5, SPC24, ERCC6L, KIF18A, NUF2, KIF15, ZWINT, UBE2C, ASPM, E2F8, CEP55, CCNE2, APITD1, HJURP, BUB1B, KIFC1, NEK2, SKA1, FAM83D, CCNA2, CDC45, CDCA2, SPAG5, CENPF, NCAPH, AURKA, CDK1, BUB1, TOP2A, PRIM1, PLK1, OIP5, SMC4, CENPE, GINS2, SUV39H2, KIF18B, HELLS, KIF20A, CKS2, BIRC5, SMC2, MELK, GPSM2, DNA2, BRIP1, KIF11, FANCD2, GINS4, MYBL2, K…	C0vsB0	Protected
3	LI.M4.2_PLK1 signaling events	0.000199322	0.00148622	-0.678587	-2.17533	0	32	NCAPG, ERCC6L, ASPM, CEP55, CKAP2L, HJURP, BUB1B, AURKA, BUB1, PLK1, CENPE, GINS2, KIF20A, MYBL2, CLSPN, NUSAP1	C0vsB0	Protected
4	LI.M4.6_cell division in stimulated CD4 T cells	0.000201369	0.00148622	-0.758588	-2.17203	0	20	CDKN3, HMMR, ANLN, CEP55, UBE2T, CDCA2, DEPDC1B, GINS2, FANCD2, BRCA2, FAM72A	C0vsB0	Protected
5	LI.M6_mitotic cell division	0.000198531	0.00148622	-0.769394	-2.44806	0	31	CENPA, CENPI, SPC24, ERCC6L, KIF18A, NUF2, ZWINT, APITD1, BUB1B, SKA1, CENPF, BUB1, PLK1, CENPE, BIRC5	C0vsB0	Protected
6	LI.M7.2_enriched in NK cells (I)	0.000204082	0.00148622	0.647943	2.27438	0	45	GZMH, GPR56, PRF1, TBX21, GNLY, FASLG, GZMA, IL2RB, NKG7, FGFBP2, CLIC3, S1PR5, CTSW, PLEKHF1, GZMB, KLRC1, XCL2, CST7, KLRB1, TGFBR3, GZMM, KLRD1, SAMD3, SH2D2A, EOMES, CD247, HOPX	C0vsB0	Protected
7	LI.M11.0_enriched in monocytes (II)	0.00020982	0.00148622	0.37463	1.67335	0	184	MYOF, TYMP, NRGN, CSF1R, GAS2L1, LRP1, APOBR, BLVRB, ADAP2, MS4A4A, FCGR1B, MAFB, SECTM1, FCGR1A, PLXNB2, SLC15A3, EPB41L3, NCF1, GRN, CFD, CST3, SERPINA1, LGALS2, FBP1, NFE2, ANPEP, CD163, SIGLEC7, CD14, IFI30, C5AR1, RXRA, KLF4, TNS3, CPPED1, RIN2, AIF1, SPI1, LILRB1, AOAH, F13A1, MS4A7, SULF2, PRAM1, FCGRT, PTAFR, ASGR1, PILRA, ASGR2, CD86, FCER1G, S100A11, ZNF467, ALDH2, SORT1, CCR1, TBXAS1, …	C0vsB0	Protected
8	LI.M27.0_chemokine cluster (I)	0.00059453	0.00340175	0.852537	1.98569	2	9	CXCL10, CCL2, IFNG, PF4, PPBP	C0vsB0	Protected
9	LI.M30_cell movement, Adhesion & Platelet activation	0.000396589	0.00259088	0.698069	1.99838	1	19	TNS1, PDGFA, ALOX12, ITGB3, ESAM, MPP1, CALD1, TPM1, GP6, PTK2	C0vsB0	Protected
10	LI.M32.0_platelet activation (I)	0.000198413	0.00148622	0.729896	2.19659	0	23	TLN1, NUCB1, FLNA, H1FX, TGFB1, ACTN4, ZYX, UBE2M, PPP1CA, NR1H2, CORO1A, ABHD17A, CCDC22, GNB2, GNAI2, PFN1, HGS, NRBP1, POR, PPP2R1A, ACAP1	C0vsB0	Protected
11	LI.M32.1_platelet activation (II)	0.000199124	0.00148622	0.697507	2.0471	0	21	TLN1, FLNA, AP2M1, TGFB1, PNPLA6, ACTN4, MAP7D1, ZYX, PKN1, MAP2K2, SIPA1, MLF2, GNB2, GNAI2, PFN1, HGS	C0vsB0	Protected
12	LI.M32.2_CORO1A-DEF6 network (I)	0.00019857	0.00148622	0.706445	2.04832	0	20	H1FX, TGFB1, ATP5D, UBE2M, STXBP2, SIPA1, TSC2, CORO1A, ABHD17A, CCDC22, HGS, CLPTM1, AES, ACAP1, TECR, DEF6	C0vsB0	Protected
13	LI.M32.3_KLF12 targets network	0.000197394	0.00148622	0.737541	2.05023	0	17	RHOG, LTBP3, UBE2M, NR1H2, CORO1A, ABHD17A, DGKZ, GNB2, GNAI2, HGS, CNOT3, NRBP1, POR, PPP2R1A, CLPTM1, ACAP1	C0vsB0	Protected
14	LI.M32.4_CORO1A-DEF6 network (II)	0.00118273	0.0060564	0.693307	1.86771	5	15	H1FX, UBE2M, NR1H2, CORO1A, ABHD17A, DGKZ, GNB2, HGS, CNOT3, NRBP1, ACAP1, DEF6	C0vsB0	Protected
15	LI.M32.8_cytoskeletal remodeling	0.000794123	0.00439034	0.777405	1.87334	3	10	TLN1, FLNA, SPTAN1, AP2M1, TGFB1, MAP7D1, ZYX, ATP2A3	C0vsB0	Protected
16	LI.M35.1_signaling in T cells (II)	0.00019861	0.00148622	0.82287	2.03944	0	11	IFNG, PRF1, FASLG, IL2RB, FOSL1, GZMB, TNFRSF4, TNFRSF18	C0vsB0	Protected
17	LI.M46_cell division stimulated CD4+ T cells	0.000200763	0.00148622	-0.698893	-2.13477	0	26	RAD51, SHCBP1, ZWINT, APOBEC3B, GGH, CDC45, CDK1, MYB, TOP2A, KIAA0101, KIF20A	C0vsB0	Protected
18	LI.M49_transcription regulation in cell development	0.000204082	0.00148622	0.554088	1.94493	0	45	ACHE, TMOD1, TAL1, KLF1, GATA1, EPB42, ANK1, SDC2, SPTB, ARHGEF12, PLXNB2, GSN, SPTA1, CCNB1, RXRA, KLF4, FHL2, LILRB1, CDH1, SEMA4A	C0vsB0	Protected
19	LI.M51_cell adhesion	0.000198689	0.00148622	0.742677	2.25721	0	24	ITGA2B, NID2, ARHGAP6, ITGB5, GP9, ALOX12, THBS1, ITGB3, ESAM, ENG, VWF, FN1, TPM1, IL1B, PARVB, GP1BA	C0vsB0	Protected
20	LI.M61.0_enriched in NK cells (II)	0.000197122	0.00148622	0.77007	2.0745	0	15	KIR2DL1, GPR56, KIR2DL3, KIR3DL1, IL2RB, NKG7, S1PR5, KLRB1, TGFBR3	C0vsB0	Protected
21	LI.M63_regulation of localization (GO)	0.000398963	0.00259088	0.761726	1.93379	1	12	NAPA, FLNA, TGFB1, ARHGDIA, STXBP2, PKN1, MAP2K2, TSC2, NR1H2, SNX17	C0vsB0	Protected
22	LI.M67_activated dendritic cells	0.00019861	0.00148622	0.803197	1.99068	0	11	SERPING1, RSAD2, C2, C1QC, IRF7, DDX60, DDX58, IFIH1	C0vsB0	Protected
23	LI.M68_RIG-1 like receptor signaling	0.00059453	0.00340175	0.82002	1.90996	2	9	CXCL10, ISG15, IRF7, DHX58, DDX58, IFIH1	C0vsB0	Protected
24	LI.M75_antiviral IFN signature	0.000199561	0.00148622	0.79769	2.36571	0	22	CXCL10, IFIT1, SERPING1, RSAD2, HERC5, OAS3, OAS1, PML, IRF7, DHX58, DDX60, CARD9, DDX58, IFIH1, IL1B, FCER1A, C1QB, BCL3	C0vsB0	Protected
25	LI.M81_enriched in myeloid cells and monocytes	0.000200602	0.00148622	0.667095	2.17257	0	32	ITGA2B, CLU, SPARC, FKBP1B, SNCA, EGF, PDGFA, CSF1R, TLR7, PCSK6, THBS1, ITGB3, PTGS1, EHD3, CD14, PRAM1, F5, FCER1G, ACTN1, NLRP3, CHI3L1	C0vsB0	Protected
26	LI.M85_platelet activation and degranulation	0.00059453	0.00340175	0.849688	1.97906	2	9	CLU, SPARC, SERPINE1, THBS1, SERPINA1, VWF, FN1, TIMP1	C0vsB0	Protected
27	LI.M101_phosphatidylinositol signaling system	0.00141186	0.00710716	-0.729859	-1.91377	6	14	AGL, CLK1, PIK3C2A, PHTF2, PPP1R12A, SP3, PIKFYVE, DEK, PIK3C3, IMPA1, C6orf211, SLC35A1, SYNJ1	C0vsB0	Protected
28	LI.M111.0_viral sensing & immunity; IRF2 targets network (I)	0.000197394	0.00148622	0.725755	2.01747	0	17	USP18, IFI35, TLR7, THBS1, BST2, TAP1, ZBP1, AIF1, PSMB8	C0vsB0	Protected
29	LI.M111.1_viral sensing & immunity; IRF2 targets network (II)	0.00019861	0.00148622	0.852437	2.11272	0	11	CXCL10, USP18, IFIT2, BST2, DDX58, TAP1, PSMB10, ZBP1, PSMB8	C0vsB0	Protected
30	LI.M112.0_complement activation (I)	0.000199561	0.00148622	0.786595	2.03863	0	13	C1QA, SERPING1, C2, C1QC, C3, CFD, C3AR1, A2M, C5AR1, C1QB	C0vsB0	Protected
31	LI.M124_enriched in membrane proteins	0.000197394	0.00148622	0.767044	2.13224	0	17	ALAS2, TGM2, AQP1, SLC4A1, SNCA, NEDD4L, LTF, C3AR1, HLA-DRB1, C5AR1	C0vsB0	Protected
32	LI.M127_type I interferon response	0.000199481	0.00148622	0.840534	2.13386	0	12	IFIT1, RSAD2, HERC5, USP18, IRF7, DDX60, STAT1, IFITM1, TAP1, IFIH1, PARP9	C0vsB0	Protected
33	LI.M146_MHC-TLR7-TLR8 cluster	0.000589044	0.00340175	0.715003	1.95898	2	16	TLR7, HLA-DRB1, HLA-DPB1, HLA-DPA1, CD4, HLA-C, CD74, HLA-A, HLA-B, HLA-DQB1, HLA-E, HLA-F	C0vsB0	Protected
34	LI.M150_innate antiviral response	0.000199481	0.00148622	0.844631	2.14426	0	12	IFIT1, OASL, RSAD2, OAS3, OAS1, IRF7, EIF2AK2, TAP1, RXRA	C0vsB0	Protected
35	LI.M165_enriched in activated dendritic cells (II)	0.000200441	0.00148622	0.738612	2.35331	0	29	IFI27, IFIT1, ATF3, SIGLEC1, SERPING1, RSAD2, HERC5, IFIT3, IFIT2, LAMP3, FAM20C, MX2, HLX, IFIH1, PRRG4, PARP9	C0vsB0	Protected
36	LI.M167_enriched in cell cycle	0.00098561	0.00532229	0.707283	1.90536	4	15	STRADB, BCL2L1, CDC34, RBM38, FLNA, GSPT1, TGFB1, MAD1L1, TSC2, PPP2R1A, PSMD3	C0vsB0	Protected
37	LI.M171_heme biosynthesis (I)	0.00019861	0.00148622	0.862033	2.1365	0	11	TMOD1, ALAS2, AHSP, PLEK2, GATA1, HMBS, HEMGN, FECH	C0vsB0	Protected
38	LI.M173_erythrocyte differentiation	0.000595593	0.00340175	0.805233	1.94039	2	10	KLF1, GATA1, EPB42, LYL1, BPGM, HMBS, TRIM10, FHL2	C0vsB0	Protected
39	LI.M196_platelet activation - actin binding	0.000197122	0.00148622	0.843732	2.27294	0	15	MPL, ITGA2B, ARHGAP6, WASF3, ITGB5, ABLIM3, THBS1, ITGB3, MFAP3L, ACSBG1, TPM1	C0vsB0	Protected
40	LI.M199_platelet activation & blood coagulation	0.000198255	0.00148622	0.775822	2.05257	0	14	GP1BB, EGF, GP9, TTC7B, SEPT5, PCSK6, LY6G6F, VWF, SH3BGRL2, GP1BA, GP6	C0vsB0	Protected
41	LI.M213_regulation of transcription, transcription factors	0.000201369	0.00148622	-0.757521	-2.16898	0	20	PTBP2, BDP1, CCNT2, BTAF1, KIAA1468, ZDHHC17, CLK1, CREBZF, PPP1R12A, CLK4, VCPKMT, STAG2, ARID4B, SREK1, ZNF700, KIAA1109, NEMF, MED23	C0vsB0	Protected
42	LI.M222_heme biosynthesis (II)	0.000798244	0.00439034	0.7564	1.96038	3	13	YPEL4, KLF1, RHCE, RHD, BLVRB, HMBS, SPTA1, TRIM10, RFESD, UROD, PPOX	C0vsB0	Protected
43	LI.S1_NK cell surface signature	0.00040494	0.00259088	0.576573	1.97341	1	40	KIR2DL1, KIR2DL3, SYNGR3, KIR3DL1, CX3CR1, FASLG, IL2RB, PDGFRB, CD97, S1PR5, GPR114, ATP9A, RARRES3, TGFBR3, IL12RB2, NCAM1	C0vsB0	Protected
44	DC.M1.1_Platelets	0.000207254	0.00148622	0.748866	2.93357	0	78	MPL, ITGA2B, MYL9, CABP5, GNAZ, SAMD14, BEND2, ABCC3, SEC14L5, SPARC, GUCY1A3, CTTN, PF4V1, TSPAN9, NRGN, EGF, NT5M, ITGB5, SLC24A3, TMEM40, TREML1, GP9, CLDN5, HIST1H2AG, ALOX12, DAB2, SEPT5, ABLIM3, CMTM5, SLC8A3, PPBP, LY6G6F, PTGS1, CTDSPL, TUBB1, BMP6, SYTL4, SPOCD1, ENDOD1, PDLIM1, VWF, SH3BGRL2, MGLL, ACSBG1, CALD1, MEIS1, GNG11, PARVB, GP6, SDPR, ACRBP, NDUFAF3, TSC22D1, F13A1, PGRMC1	C0vsB0	Protected
45	DC.M1.2_Interferon	0.000198689	0.00148622	0.926337	2.8154	0	24	CXCL10, IFIT1, MX1, OASL, BATF2, SERPING1, RSAD2, ISG15, HERC5, IFIT3, HES4, OAS3, IFI44L, LY6E, EPSTI1, OAS1, OAS2, XAF1, RTP4, TRIM6, LAMP3, OTOF, IFI44, IFITM3	C0vsB0	Protected
46	DC.M2.3_Erythrocytes	0.000206186	0.00148622	0.851539	3.20997	0	64	CA1, IFIT1B, TMOD1, ALAS2, DYRK3, GMPR, SELENBP1, CCDC176, TGM2, AHSP, NPRL3, KLF1, OSBP2, TNS1, SLC6A8, IGF2BP2, KRT1, TRIM58, PLEK2, HBD, SLC4A1, XK, FAM210B, KANK2, EPB42, BCL2L1, SNCA, TMCC2, TSTA3, ANK1, NFIX, GPR146, BPGM, CTNNAL1, SLC1A5, RBM38, BSG, CISD2, HMBS, ARHGEF12, MXI1, CHPT1, SIAH2, MARCH8, FECH, SLC2A1	C0vsB0	Protected
47	DC.M3.1_Erythrocytes	0.000206143	0.00148622	0.842876	3.24702	0	71	VWCE, RUNDC3A, HBQ1, MYL4, ESPN, TGM2, SLC25A39, PBX1, STRADB, KEL, GYPC, DMTN, UBXN6, GATA1, RAB3IL1, FBXO7, PHOSPHO1, PDZK1IP1, ADIPOR1, HBG2, BCL2L1, CDC34, GUK1, FAXDC2, HAGH, PLVAP, ASCC2, TSPAN5, TESC, DPM2, TPGS2, TMPRSS9, HBG1, MBNL3, ST6GALNAC4, CARM1, DCAF12, TMEM86B, R3HDM4, MCOLN1, HMBS, AP2A1, TMEM63B, ATP6V0C, GRINA, MXI1, PSMF1, MAP2K3, RNF123, MKRN1, HPS1, SLC25A37, CNPPD1, SPTA1,…	C0vsB0	Protected
48	DC.M3.3_Cell Cycle	0.000195389	0.00148622	-0.786481	-2.76076	0	48	CENPA, CDKN3, NCAPG, HMMR, ANLN, TTK, DLGAP5, PARPBP, UBE2C, ASPM, CEP55, APOBEC3B, GGH, ORC1, CCNA2, SPAG5, AURKA, CDK1, BUB1, TOP2A, KIAA0101, GINS2, CKS2, MELK, KIF11, TK1, SLC2A5, ELL2, NUSAP1, RRM2, CCNB2, PTTG1, PLK4	C0vsB0	Protected
49	DC.M3.4_Interferon	0.00020475	0.00148622	0.810247	2.88088	0	48	ATF3, SEPT4, MT2A, IFI35, OAS2, PML, FBXO6, HELZ2, IFIT2, UBE2L6, GBP1, WARS, GBP4, IRF7, SCO2, LAP3, DHX58, PARP12, PARP10, CARD17, HERC6, PARP14, STAT1, LGALS3BP, STAT2, MOV10, IFITM1, GBP5, EIF2AK2, DDX58, IFIT5, APOL6, CEACAM1, IFIH1, ZBP1, GALM	C0vsB0	Protected
50	DC.M3.6_Cytotoxic/NK Cell	0.000204541	0.00148622	0.724069	2.52628	0	44	IFNG, GZMH, GPR56, ZNF683, PRF1, GNLY, FASLG, GZMA, IL2RB, NKG7, FGFBP2, CLIC3, CTSW, PLEKHF1, FCRL6, GPR114, NCR3, TGFBR3, GZMM, PRSS23, TSEN54, GPR68, KLRD1, SAMD3, SH2D2A, NCALD, EOMES, KIR3DL2, PYHIN1, CD160	C0vsB0	Protected
51	DC.M4.1_T cell	0.00117647	0.0060564	-0.500987	-1.79703	5	54	ADTRP, OXNAD1, HOOK1, IL7R, KLHL3, ICOS, AXIN2, TRAT1, EDAR, TXK, CD28, SLC16A10, NELL2, FAM134B, LRRN3, HPCAL4, GPR183, TBC1D4, SH3YL1, LEF1, FAM84B, BACH2, ATP8B2, BCL2	C0vsB0	Protected
52	DC.M4.7_Cell Cycle	0.00019279	0.00148622	-0.46621	-1.86468	0	95	CYP4V2, SLC39A10, SLC38A1, ZNF84, ATM, SLC7A6, SLC25A36, ZNF529, NOC3L, IFT74, AKAP11, POGLUT1, LANCL1, PEX3, ZMYND11, CEP290, CASD1, CLEC2D, TRAF5, SUN1, TYW3, XPO4, FAM35A, SMAD5, SHQ1, ZZZ3, ABCE1, NPAT, ASF1A, ZNF559, ZNF337, ANKRD46, MPRIP, CBLB, SLAIN1, ARMC1, ZNF721, TSPAN3, WDR36, WDR75, LPIN1, BMI1, C12orf29, URI1, COQ10A, ARL14EP, KMT2A, PREPL	C0vsB0	Protected
53	DC.M4.11_Plasma Cells	0.000410004	0.00259088	-0.926524	-1.82992	1	5	IGJ, TXNDC5, GLDC, TNFRSF17	C0vsB0	Protected
54	DC.M5.10_Mitochondrial Respiration	0.000210172	0.00148622	0.352854	1.61369	0	218	DDT, CHMP4A, GTF2H5, ATG101, HCFC1, CTNNBL1, NUDC, MAD1L1, NDUFA9, FKBP2, NDUFB11, ZNF593, CUL1, CCDC12, EIF4G1, DNPEP, CDK2AP2, C19orf53, RPP25L, MRPL41, EDF1, ACAD9, NUTF2, PDSS2, SLC50A1, COPS6, EXOSC1, GTF3C5, IFT27, SMARCAL1, ZNRD1, MDP1, SNRPB, SEPW1, NDUFA3, HSD17B10, RTCB, UBAP2, ZSCAN21, MRPS9, MRPS11, MRPL23, HNRNPM, HSP90AB1, RNF4, PIH1D1, FAF1, SCD, NDUFA13, SNRPA, MDH2, RNPS1, ICAM2,…	C0vsB0	Protected
55	DC.M5.12_Interferon	0.000206016	0.00148622	0.634793	2.33567	0	57	C1QA, ETV7, TYMP, BST2, LGALS9, TCN2, HSH2D, PARP10, IRF9, UNC93B1, PSMB9, DRAP1, GBP2, TRIM21, DHRS9, TAP1, ISG20, ACTA2, REC8, GADD45B, TRANK1, ZNFX1, TMEM140, ADAR, RHBDF2, RBCK1, RNF213, TRAFD1, TRIM5, PHF11, SP110, ASPRV1, TAP2, IFI16, SP140, NMI, TDRD7	C0vsB0	Protected
56	DC.M6.6_Apoptosis / Survival	0.00102375	0.00542954	0.515623	1.83333	4	48	OSGIN1, CIDEB, SLC43A2, EMILIN2, SLC9A1, EPN1, C3AR1, MOB3A, CD14, IFI30, GALK1, GABARAP, MARCO, NAPRT1, CTSD, TNFRSF1B, FCN1, CD300C, DEDD2, ST3GAL2, MAP3K6, CAPG, SIPA1L1, SLC26A6, TSPO, FAM129B, TBC1D2, BCKDK	C0vsB0	Protected
57	DC.M6.18_Erythrocytes	0.00179605	0.00889044	0.719927	1.86585	8	13	TMEM158, BPGM, RHD, SPTB, HEMGN, RAD23A, RFESD	C0vsB0	Protected
58	DC.M7.1_Inflammation	0.000208899	0.00148622	0.404888	1.79548	0	172	RAB38, TLN1, APOBR, MYH9, TMEM119, CDC42EP4, FAM20C, CAPN1, MAP1S, MIIP, GBGT1, GSN, CTSA, MYADM, DENND1A, UBA1, ZNF213, PLEKHO2, WAS, PTPN6, SH2B2, CDKN2D, SHISA5, TALDO1, CYB5R3, NFKBIB, PKM, TNIP1, TIMP1, WDR13, RAB4B, PPP4C, BCORL1, TOR4A, G6PD, LSP1, MSN, MLF2, ULK1, RIPK3, ALDH3B1, ACTR1A, CAPZB, RAB1B, RAB3D, TADA3, RHBDD2, MSRA, KIAA0930, IL2RG, RIN3, CUX1, RAB5C, ZDHHC12, FAM214B, LRPAP1…	C0vsB0	Protected
59	DC.M8.46_Cytotoxic/NK	0.000199561	0.00148622	0.802552	2.07999	0	13	KIR2DL1, KIR2DL3, AKR1C3, MYOM2, KIR3DL1, GZMB, KLRC1, KLRB1, PDGFD	C0vsB0	Protected
60	DC.M9.42_Cell Cycle	0.000405186	0.00259088	-0.72867	-2.00178	1	17	E2F7, E2F8, ATAD5, CDC45, KIAA0101, DEPDC1B, NPTX1, C16orf59, GINS4, ZWILCH	C0vsB0	Protected
61	LI.M4.0_cell cycle and transcription	0.00089982	0.00786019	0.307755	1.48738	5	320	E2F7, ERCC6L, RAD51, ASPM, KIAA0101, CEP55, UBE2T, SPC24, DLGAP5, POLE2, KIF14, CENPA, KIF18A, KIF15, CDC6, NUF2, CENPI, HJURP, ANLN, PARPBP, HMMR, KIAA1524, TFEC, DMXL2, IRAK3, TOP2A, DONSON, PLK4, UBE2C, KNTC1, KCTD12, BRIP1, SMC2, HELLS, SHCBP1, CKS2, ORC1, KIF18B, CENPU, CENPF, WDFY3, FGL2, DAPK1, E2F8, KIF20B, KIFC1, TLR4, CLEC7A, CCNA2, NEK2, KIAA1598, KIF11, ECT2, CD302, CYP1B1, GINS2, CDC…	C1vsC0	Protected
62	LI.M4.1_cell cycle (I)	0.000489077	0.00500883	0.385512	1.68102	2	139	E2F7, ERCC6L, RAD51, ASPM, CEP55, SPC24, DLGAP5, POLE2, CENPA, KIF18A, KIF15, CDC6, NUF2, CENPI, HJURP, ANLN, SMC4, TOP2A, PLK4, UBE2C, KNTC1, BRIP1, SMC2, HELLS, CKS2, KIF18B, CENPU, CENPF, E2F8, KIF20B, KIFC1, CCNA2, NEK2, KIF11, ECT2, GINS2, BRCA1	C1vsC0	Protected
63	LI.M7.0_enriched in T cells (I)	0.000228624	0.00356201	-0.540314	-2.09145	0	54	MAL, CD27, FLT3LG, PTPRCAP, SIT1, CD6, CD3E, CD7, LAT, IL32, SIRPG, LEF1, LCK, UBASH3A, GZMM, NELL2, CD247, CD2, CD3D, ZAP70, XCL2, KLRB1, GATA3	C1vsC0	Protected
64	LI.M7.1_T cell activation (I)	0.000452796	0.00498076	-0.52369	-1.96373	1	47	CD27, CCR7, SIT1, CD3E, CD7, CD5, CD8B, TCF7, SIRPG, LEF1, LCK, CD247, IL21R, CD2, DPP4, CD3D, SLAMF1, RHOH, ZAP70, GATA3, CORO1A, SLA2, CRTAM, MS4A1, PRKCQ	C1vsC0	Protected
65	LI.M14_T cell differentiation	0.000209556	0.00356201	-0.771813	-2.0378	0	12	MAL, NOG, TCF7, SPOCK2, UBASH3A, LRRN3	C1vsC0	Protected
66	LI.M32.0_platelet activation (I)	0.000647389	0.00600858	-0.628441	-1.99363	2	23	ACAP1, UBE2M, ABHD17A, H1FX, TGFB1, PPP1CA, ZYX, PPP2R1A, PFN1, NR1H2, CCDC22, NUCB1, GNB2, FLNA, CORO1A, POR, GNAI2	C1vsC0	Protected
67	LI.M37.0_immune activation - generic cluster	0.000451196	0.00498076	0.322669	1.55407	2	308	INHBA, C10orf10, ERI2, ARG1, FCGR2C, JAG1, MS4A3, PDGFC, SLC19A2, CLEC4D, PRTN3, DEFA4, CRISP3, SLC22A15, SLCO4C1, TNFAIP6, FGD4, SLC27A2, MMP8, GAB1, SMC4, PTGS2, LRRK2, SERPINB10, RNASE3, FCAR, ESCO2, SLC24A4, BRCA2, CRISPLD2, ENTPD1, MGAM, FAM46A, LIN7A, MYB, SLC8A1, G0S2, VNN1, CREB5, CD177, LRP12, NME8, B3GNT5, STX11, DOCK5, MLLT4, LPCAT2, S100A8, MEGF9, HP, BARD1, KLF5, HMGB2, PSD3, ACSL1, …	C1vsC0	Protected
68	LI.M47.0_enriched in B cells (I)	0.00022482	0.00356201	-0.673556	-2.49297	0	44	FCER2, CD79A, PKIG, CD79B, CXCR5, TCL1A, CD22, HLA-DOB, BLK, CD72, VPREB3, SPIB, FCRLA, PNOC, FAM129C, CD19, CR2, PAX5, P2RX5	C1vsC0	Protected
69	LI.M47.1_enriched in B cells (II)	0.000220507	0.00356201	-0.588874	-2.04342	0	33	CD79A, PKIG, CD79B, CXCR5, POU2AF1, TCL1A, HLA-DOB, FCRLA, PNOC, CD19, CR2, PAX5	C1vsC0	Protected
70	LI.M69_enriched in B cells (VI)	0.000213721	0.00356201	-0.724173	-2.21571	0	20	CD79A, CD79B, CXCR5, CD22, HLA-DOB, CD72, CD19, CR2, P2RX5	C1vsC0	Protected
71	LI.M75_antiviral IFN signature	0.000186741	0.00356201	0.730004	2.20802	0	22	RSAD2, OAS3, HERC5, IFIT1, DDX60, C1QB, DDX58, SERPING1, OAS1, ANXA3	C1vsC0	Protected
72	LI.M101_phosphatidylinositol signaling system	0.000377287	0.00454302	0.722392	1.94642	1	14	PPP1R12A, PIK3C2A, PIKFYVE, AGL, IMPA1, SYNJ1, PHTF2, CLK1, SP3, C6orf211, DEK, PIK3C3, SLC35A1	C1vsC0	Protected
73	LI.M127_type I interferon response	0.000382409	0.00454302	0.764207	1.96926	1	12	RSAD2, HERC5, IFIT1, DDX60, STAT1, PARP9, PLSCR1, IFIH1	C1vsC0	Protected
74	LI.M129_inositol phosphate metabolism	0.000381679	0.00454302	0.747645	1.96934	1	13	KIAA1109, PANK3, FNDC3A, PIK3C2A, PIKFYVE, IMPA1, SYNJ1, MED23, AVL9, CASC4, SRP9, PIK3C3, PLEKHF2	C1vsC0	Protected
75	LI.M150_innate antiviral response	0.000382409	0.00454302	0.7654	1.97233	1	12	RSAD2, OAS3, IFIT1, EIF2AK2, OAS1, PLSCR1, OASL, APOBEC3A, SP100	C1vsC0	Protected
76	LI.M156.0_plasma cells & B cells, immunoglobulins	0.000214362	0.00356201	-0.742055	-2.2974	0	21	IGLL5, CD22, BLK, VPREB3, GNG7, SPIB, CPNE5, TNFRSF17, OSBPL10, P2RX5, ITM2C, FCRL2, STAP1	C1vsC0	Protected
77	LI.M165_enriched in activated dendritic cells (II)	0.000184332	0.00356201	0.653458	2.10915	0	29	DOCK4, RSAD2, PDGFC, LAMP3, HERC5, TNFAIP6, IFIT1, ATF3, IFIT2, SERPING1, IFIT3, DAPK1, SIGLEC1, PARP9	C1vsC0	Protected
78	LI.M213_regulation of transcription, transcription factors	0.000187864	0.00356201	0.802948	2.37186	0	20	KIAA1109, CCNT2, BDP1, BTAF1, ZDHHC17, ARID4B, PPP1R12A, CREBZF, KIAA1468, PTBP2, FMR1, CLK1, STAG2, CLK4, NEMF, MED23, SREK1, ZNF700	C1vsC0	Protected
79	LI.M237_golgi membrane (II)	0.000187266	0.00356201	0.745078	2.11367	0	17	SLC35A3, ZDHHC17, RAB33B, GOPC, GALNT7, ARFIP1, C1GALT1C1, PAQR3, GOLT1B, PNPLA8, SGMS1, RAB21, C3orf58, SLC35A5	C1vsC0	Protected
80	LI.S0_T cell surface signature	0.000645995	0.00600858	-0.644299	-2.11218	2	26	MAL, FLT3LG, PTPRCAP, SIT1, CD6, CD3E, SIRPG, TMEM106C, CD320, LRRN3, LAG3, CCDC167, CD2	C1vsC0	Protected
81	DC.M1.1_Platelets	0.000239866	0.00356201	-0.503476	-2.09742	0	78	PF4V1, SAMD14, NGFRAP1, MYL9, CMTM5, NRGN, ITGA2B, HIST1H2AG, ACSBG1, GNAZ, CTTN, ABCC3, SPARC, GP9, NT5M, TSPAN33, CLDN5, ITGB5, TREML1, LY6G6F, ALOX12, PARVB, PDLIM1, VWF, SEPT5, NDUFAF3, CTDSPL, ABLIM3, GRAP2, DNM3, JAM3, CABP5, EGF	C1vsC0	Protected
82	DC.M1.2_Interferon	0.000185908	0.00356201	0.752313	2.32431	0	24	IFI44L, RSAD2, IFI44, LAMP3, OAS3, HERC5, IFIT1, SERPING1, HES4, EPSTI1, IFIT3, OAS1, OASL, BATF2, XAF1, OAS2	C1vsC0	Protected
83	DC.M2.3_Erythrocytes	0.000469925	0.00498456	-0.46713	-1.86778	1	64	ALAS2, KLF1, NPRL3, KRT1, TMOD1, CTNNAL1, AHSP, EPB42, SELENBP1, OSBP2, GMPR, GPR146, NFIX, TSTA3, SLC6A8, DYRK3, BSG, HMBS, KANK2, SLC2A1, RBM38, TNS1, PLEK2, CCDC176, IFIT1B, FAM210B, BCL2L1, TRIM10, CA1, GYPE, SLC4A1, PITHD1	C1vsC0	Protected
84	DC.M3.1_Erythrocytes	0.000234028	0.00356201	-0.553577	-2.27029	0	71	HBQ1, TMPRSS9, PDZK1IP1, KEL, MYL4, VWCE, GYPC, RUNDC3A, SLC25A39, ESPN, PHOSPHO1, UBXN6, ST6GALNAC4, RAB3IL1, GUK1, DMTN, DPM2, PBX1, PRDX2, TESC, R3HDM4, TSPAN5, FAXDC2, CDC34, UBALD1, PSMF1, HAGH, ASCC2, HMBS, GATA1, TMEM86B, ATP6V0C, CNPPD1, GRINA, STRADB, AP2A1, ADIPOR1, MAP2K3, FBXO7, BCL2L1, GUCD1	C1vsC0	Protected
85	DC.M3.4_Interferon	0.000178731	0.00356201	0.618113	2.24321	0	48	SAMD9L, TNFAIP6, GBP5, TRIM22, ATF3, IFIT5, IFIT2, APOL6, DDX58, EIF2AK2, GBP1, PARP14, CARD17, GBP4, IDO1, STAT1, PARP9, PLSCR1, TNFSF10, STAT2, OAS2, AIM2, MT2A, GBP3, IFIH1, CEACAM1	C1vsC0	Protected
86	DC.M4.1_T cell	0.000228624	0.00356201	-0.65457	-2.53371	0	54	CD248, MAL, TCEA3, CCR7, LTBP3, SELM, ID3, STMN3, TMEM204, CD3E, TESPA1, FAM134B, CD40LG, FAM102A, DHRS3, GAL3ST4, TCF7, FAIM3, LEF1, ADTRP, EPHX2, PASK, SPOCK2, LRRN3, NELL2, THNSL1, ARMCX2, TNFRSF25, MAN1C1, HPCAL4	C1vsC0	Protected
87	DC.M4.3_Protein Synthesis	0.000222965	0.00356201	-0.601182	-2.15768	0	38	RPL36, RPS20, RPS4X, RPL14, RPS13, PEBP1, RPL22, RPL12, RPS5, RPL7A, RPS27A, RPS3, APRT, C19orf70, RPL4, RPL5, RPS14, RPL6, SNRPD2, EPB41L4A-AS1	C1vsC0	Protected
88	DC.M4.10_B cell	0.000219346	0.00356201	-0.679673	-2.31424	0	30	FCER2, CD79A, CD79B, CXCR5, TCL1A, HLA-DOB, BLK, CD72, VPREB3, SPIB, FCRLA, FAM129C, CD19, OSBPL10, CNTNAP2, HLA-DOA	C1vsC0	Protected
89	DC.M5.7_Inflammation	0.000164204	0.00356201	0.4184	1.81142	0	132	C9orf72, OSBPL8, ZBTB34, KBTBD7, MAP3K2, TMF1, FNIP1, MYO5A, RRM2B, STXBP5, ACAP2, ZNF217, CD46, CDK5R1, CARD8, DDX3X, RGS18, ZBTB18, TOPORS, ELF1, HBP1, SPAG9, LONRF1, CELF2, HMGCR, NUP50, PLXDC2, STXBP3, CASC4, VAV3, MARCH7, FAM49A, CPD, ATP6V1A, VCPKMT, KIAA0247, KIAA0232, ADAM19, RBPJ, CYBRD1, MANBA, MPZL2, CRK, CBL, PTPRE, PPP3CA, HSDL2, UBR2, MFSD1, CHMP1B, CTSS, FCGR2B, SERINC1, ATXN1, TMX…	C1vsC0	Protected
90	DC.M5.9_Protein Synthesis	0.000229727	0.00356201	-0.510996	-1.98539	0	55	ZP3, RPS28, RPLP2, RPL38, RPL32, RPS19, RPS12, RPS16, SF3A2, RPS25, NME3, RPS8, RPL8, RPS11, GPX4, UROS, RPS10, TXNRD2, RPL6, RPL30, FAM173A, OCEL1, RPLP0, PIK3R2, RPL35A, FAU, RPL11	C1vsC0	Protected
91	DC.M5.10_Mitochondrial Respiration	0.000281373	0.00397942	-0.380276	-1.86869	0	218	MIF, MRPL41, GTF2H5, FKBP2, NDUFB11, NDUFA3, ZNF593, C19orf53, BCAT2, NUDC, DDT, EDF1, NDUFA13, SPAG7, SUSD3, SNUPN, MAD1L1, TMEM101, GNL1, MED19, CCDC12, CLPP, SNRPA, COPS6, LSM2, MRPL22, ATG101, RPUSD3, PIH1D1, EEF1D, NDUFB8, HSP90AB1, PAGR1, RPP25L, SNRPB, ACAD9, SLC25A25, SEPW1, CHMP4A, CDK2AP2, C16orf80, HDDC3, PNKD, DAD1, HNRNPM, GTF3C5, ICAM2, ETFB, PSMC3, MRPL23, HSD17B10, MRPS9, MDH2, RR…	C1vsC0	Protected
92	DC.M5.12_Interferon	0.000177588	0.00356201	0.518135	1.94314	0	57	SAMD9, NCOA7, TRIM56, CHMP5, NTNG2, RNF213, ABCA1, DHRS9, LHFPL2, TRIM38, ETV7, NT5C3A, NBN, TDRD7, TAP2, DYNLT1, BTN3A1, TRANK1, SP100, TRIM25, SP110, ZC3HAV1, SRBD1, CASP1, C1QA, MDK, ADAR, TCN2	C1vsC0	Protected
93	DC.M6.2_Mitochondrial Respiration	0.000780437	0.00702393	-0.368228	-1.71517	2	149	NDUFA11, CFDP1, EMP3, NDUFS6, ATP5I, PRKCSH, RPL36AL, NAA10, ANAPC11, COX4I1, RPS19BP1, NDUFS7, FBXL15, TBC1D22A, MFSD5, DPM3, NDUFB10, POLE4, G6PC3, MRPS18A, ARL6IP4, EMC6, PSMD8, GPKOW, NDUFB7, SNX17, NAA38, PPM1G, EVI5L, SNRPB2, DDRGK1, EIF4ENIF1, TRUB2, TMEM258, MRPL17, IDH3B, ACO2, ALKBH5, TMED9, VKORC1, SYVN1, SF3B2, ARFGAP2, RPP21, EIF6, CLTA, ATPIF1, RRP36, CALM1, SF3B5, HDAC3, R3HCC1, VD…	C1vsC0	Protected
94	DC.M9.42_Cell Cycle	0.000561798	0.0055618	0.710818	2.01648	2	17	E2F7, KIAA0101, NPTX1, C16orf59, ATAD5, RGS1, E2F8	C1vsC0	Protected
95	LI.M4.1_cell cycle (I)	0.000130344	0.00988188	0.455129	1.86331	0	139	CENPI, NCAPG, ASPM, CEP55, ERCC6L, RAD51, CENPA, HJURP, CENPU, CDKN3, CDC6, ANLN, KIF15, DLGAP5, CDC45, SUV39H2, SMC4, KIF18A, SGOL2, UBE2C, APITD1, SPC24, GINS1, CENPN, E2F7, KIF18B, TTK, SKA1, BRIP1, GPSM2, PRIM1, PRKAR2B, E2F2, NUSAP1, SMC2, CENPF, KIF20B, CKS2, HELLS, FBXO5	C7vsC0	Protected
96	LI.M213_regulation of transcription, transcription factors	0.000166362	0.00988188	0.688614	1.96471	0	20	CCNT2, PTBP2, ARID4B, ZDHHC17, BDP1, PPP1R12A, KIAA1468, BTAF1, CREBZF, STAG2, NEMF, SREK1, KIAA1109, FMR1, CLK1, CLK4, DUSP10, MED23, ZNF700	C7vsC0	Protected
97	DC.M2.3_Erythrocytes	0.000145012	0.00988188	0.708727	2.57173	0	64	CMBL, SLC6A9, TMEM56, SLC4A1, TRIM10, SLC14A1, CA1, HBD, TRIM58, KLF1, PLEK2, XK, SLC6A8, SNCA, EPB42, OSBP2, FAM210B, SELENBP1, AHSP, TNS1, IFIT1B, BCL2L1, YOD1, RNF182, FECH, IGF2BP2, ANK1, TMOD1, KANK2, MICAL2, HMBS, FAM46C, CTNNAL1, RBM38, BPGM, TGM2, MXI1, GPR146, TMCC2, TBCEL, BNIP3L, GMPR, ARHGEF12, DNAJA4, ALAS2, CHPT1, MARCH8, KRT1, DYRK3	C7vsC0	Protected
98	DC.M3.1_Erythrocytes	0.000143	0.00988188	0.551009	2.03783	0	71	HBG1, SPTA1, HBG2, DCAF12, STRADB, TMPRSS9, TCP11L2, DMTN, E2F2, BCL2L1, RAB3IL1, TSPAN5, MYL4, RNF11, HMBS, HAGH, KEL, PDZK1IP1, FAXDC2, TGM2, MXI1, SLC25A37, PLVAP, RUNDC3A, ST6GALNAC4, SLC25A39, SESN3, RAB2B, ADIPOR1, FBXO7, MBNL3, LGALS3, HBQ1, TESC, GUK1, CARM1, GSPT1, FAM104A, GATA1, GYPC, ESPN, ASCC2, TPGS2, RANBP10, TMEM86B, MKRN1, UBXN6	C7vsC0	Protected
99	DC.M3.3_Cell Cycle	0.00015067	0.00988188	0.585896	2.01428	0	48	NCAPG, ASPM, HMMR, CEP55, CENPA, PARPBP, CDKN3, ANLN, DLGAP5, UBE2C, CENPN, TTK, ELL2, NUSAP1, GGH, ORC1, CKS2	C7vsC0	Protected
100	LI.M3_regulation of signal transduction	0.000283768	0.00240901	0.663258	2.41886	0	42	FZD8, S100A12, IL1RN, FPR1, TLR5, LRP1, TLR2, WLS, BMP2, C5AR1, HMOX1, TIMP2, CCR1, CDK14, CSF1R, LYN, SULF2, NOD2, APCDD1, BCL6, ADAP2, PLXNB2, PRKCD, SYK	C0vsB0	Non-protected
101	LI.M4.1_cell cycle (I)	0.000132013	0.00240901	-0.627328	-2.49156	0	139	DSCC1, KIF15, MELK, BUB1B, ERCC6L, CEP55, ASPM, CCNB2, CENPA, CDC6, CCNE2, CKS2, CDK1, CDC45, KIF18B, NUF2, GINS4, DLGAP5, CENPN, CENPW, ZWINT, CCNA2, KIF18A, POLE2, KIF20B, RAD54L, MKI67, RAD51, BRIP1, PLK4, SUV39H2, CASC5, CDCA2, KIF2C, MYBL2, KNTC1, MAD2L1, GINS2, CDT1, HJURP, CCNF, RRM2, CDC20, CENPF, SKA3, HELLS, CDCA3, BIRC5, BUB1, CDKN3, APITD1, OIP5, SMC4, SPDL1, CCNB1, TIPIN, GPSM2, GMNN…	C0vsB0	Non-protected
102	LI.M4.2_PLK1 signaling events	0.000315308	0.00240901	-0.64366	-1.9833	1	32	BUB1B, ERCC6L, CEP55, ASPM, RAD51AP1, KIF14, CLSPN, MYBL2, GINS2, SGOL1, HJURP, CDC20, BUB1, PLK1, FBXO5	C0vsB0	Non-protected
103	LI.M4.3_myeloid cell enriched receptors and transporters	0.000270416	0.00240901	0.672472	2.26624	0	30	SLC1A3, CD14, SECTM1, TLR5, MYOF, TLR8, SIGLEC7, CCR1, IGSF6, CHST15, MARCO, SLC15A3, SULF2, AMICA1, LRRC25, SLC8A1, ASGR1	C0vsB0	Non-protected
104	LI.M4.4_mitotic cell cycle - DNA replication	0.00239311	0.0083618	-0.588249	-1.7738	14	29	KIF15, CDC6, CDC45, POLE2, PLK4, MCM8, CDT1, STIL, OIP5	C0vsB0	Non-protected
105	LI.M4.5_mitotic cell cycle in stimulated CD4 T cells	0.000156323	0.00240901	-0.637193	-1.98979	0	34	IFNG, MELK, CEP55, DEPDC1B, KIAA0101, CDK1, NUF2, CHAC2, MAD2L1, RNF144A, CDCA7, RRM2, CDC20, UBE2T, ZNF367, FBXO5, TOP2A, CXCR6, CENPM, KIF11, ZEB1	C0vsB0	Non-protected
106	LI.M4.6_cell division in stimulated CD4 T cells	0.000163747	0.00240901	-0.755987	-2.10423	0	20	DSCC1, HMMR, CEP55, DEPDC1B, POLE2, CDCA2, GINS2, CDCA7, CDKN3, UBE2T, GINS1, FAM72A	C0vsB0	Non-protected
107	LI.M4.7_mitotic cell cycle	0.00130997	0.00589487	-0.66203	-1.84271	7	20	CCNB2, CDK1, CCNA2, CEP76, PLK4, CDT1, CCNB1, PLK1, SHCBP1, NEK2, CEP72, CEP152	C0vsB0	Non-protected
108	LI.M4.10_cell cycle (II)	0.00169291	0.0067945	-0.72985	-1.85237	9	14	MELK, CCNB2, CCNE2, CDK1, GINS2, RRM2, CCNB1, CCNE1, DTL	C0vsB0	Non-protected
109	LI.M4.11_mitotic cell cycle in stimulated CD4 T cells	0.00188227	0.00726392	-0.744537	-1.81301	10	12	MELK, GSG2, CCNA2, RAD54L, CDCA3, SPDL1	C0vsB0	Non-protected
110	LI.M4.13_cell junction (GO)	0.00143438	0.00617406	0.755048	1.9325	5	11	HCK, CTNNA1, LCP1, FES, IFI30, PRKCD, TNS3, HOMER3, PAK1, KCTD12	C0vsB0	Non-protected
111	LI.M5.0_regulation of antigen presentation and immune response	0.000665115	0.00370121	0.412785	1.70365	1	78	FCGR1B, LY96, TLR5, TLR2, HCK, FCER1G, MAPK14, TLR1, VASP, TLR4, LAT2, LYN, MAP2K6, FOS, CSK, RPS6KA1, PTPN6, LILRB2, LCP2, SYK, MNDA, MYD88, TLR6, NFKBIA, IRAK3, FGR	C0vsB0	Non-protected
112	LI.M6_mitotic cell division	0.000158178	0.00240901	-0.682384	-2.09101	0	31	BUB1B, ERCC6L, CENPA, NUF2, CENPN, ZWINT, KIF18A, CASC5, KIF2C, MAD2L1, CDC20, CENPF, BIRC5, BUB1, APITD1, SPDL1, PLK1	C0vsB0	Non-protected
113	LI.M7.1_T cell activation (I)	0.00015361	0.00240901	-0.606548	-2.01629	0	47	MS4A1, TXK, RORA, ICOS, CAMK4, CD28, NLRC3, ITPR3, THEMIS, CD8B, RASGRP1, ITK, KLRK1, IL7R, PTPN22, TIGIT, CD8A, TCF7, LEF1, CD3G, RHOH, BCL11B, CD3D, CD27, GATA3, IL21R, SLAMF1, CRTAM, LCK, PRKCH, PRKCQ, ZAP70, EOMES, CD5, DPP4	C0vsB0	Non-protected
114	LI.M8_E2F transcription factor network	0.000830427	0.00418028	-0.707947	-1.91563	4	18	MELK, ERCC6L, CDC6, KIAA0101, ZWINT, CCNA2, RAD54L	C0vsB0	Non-protected
115	LI.M10.0_E2F1 targets (Q3)	0.00205631	0.00744786	-0.587928	-1.80157	12	31	MELK, CDC6, KIAA0101, POLE2, RAD51, ATAD2, GMNN, ZNF367, FBXO5, E2F7, NR3C2, DCK	C0vsB0	Non-protected
116	LI.M11.0_enriched in monocytes (II)	0.000470146	0.00280045	0.724983	3.438	0	184	FCGR1B, FCGR1A, QPCT, CD14, NFE2, AQP9, S100A12, ITGAM, MGST1, FPR1, SECTM1, FPR2, TLR5, ANPEP, SERPINA1, PYGL, PLXDC2, CRISPLD2, CD163, LRP1, TLR2, FCGR2A, ALOX5, MYOF, HCK, PADI2, S100A11, FCER1G, CEBPD, GRN, MSRB1, LILRB3, CACNA2D3, SPI1, C5AR1, CYP1B1, SORT1, SIRPA, CSF3R, CDA, LILRA5, RBP7, IMPA2, TLR8, LILRA6, SIRPB1, BST1, HSPA6, ZNF467, VNN2, APOBR, TIMP2, NRGN, SIGLEC7, RBM47, SLC11A1, C…	C0vsB0	Non-protected
117	LI.M11.1_blood coagulation	0.000260213	0.00240901	0.712017	2.18108	0	21	F5, ITGAM, SERPINA1, FCER1G, SLC16A3, SIRPA, PSAP, TREM1, ITGAX, LYN, AMICA1, P2RX1, CD36, SYK, F13A1	C0vsB0	Non-protected
118	LI.M11.2_formyl peptide receptor mediated neutrophil response	0.00141243	0.00617406	0.818953	1.97391	5	9	FPR1, SECTM1, FCGR2A, SLC11A1, IGSF6, PILRA, NCF2	C0vsB0	Non-protected
119	LI.M16_TLR and inflammatory signaling	0.000289268	0.00240901	0.795992	2.94285	0	45	FCGR1B, FCGR1A, DYSF, NFE2, AQP9, MGAM, FPR1, LY96, PADI4, FPR2, CXCR2, TLR5, KCNJ15, ANPEP, TLR2, NCF4, ALOX5, LILRB3, WDFY3, NPL, C5AR1, CSF3R, TLR8, LILRA6, BST1, HSPA6, APOBR, TLR1, TLR4, SIGLEC9, ITGAX, FES, P2RY13, FCAR, KCNJ2, PILRA, TYROBP, LILRB2, MYD88, TLR6	C0vsB0	Non-protected
120	LI.M23_RA, WNT, CSF receptors network (monocyte)	0.00165759	0.00678874	0.790456	1.96171	6	10	SPI1, CSF3R, CSF1R, FOS, RXRA, RARA, FZD2, CEBPA	C0vsB0	Non-protected
121	LI.M29_proinflammatory cytokines and chemokines	0.000443951	0.00280045	0.931833	1.858	1	5	C3, IL1B, CCRL2	C0vsB0	Non-protected
122	LI.M31_cell cycle and growth arrest	0.000710395	0.0037594	0.819262	2.0332	2	10	OSM, THBS1, DUSP1, IL1B, JUNB, PPP1R15A, GADD45B, RARA	C0vsB0	Non-protected
123	LI.M32.0_platelet activation (I)	0.000264201	0.00240901	0.724358	2.2691	0	23	POR, ZYX, TLN1, GNB2, NUCB1, TGFB1, ACAP1, GNAI2, UBE2M, NR1H2, ACTN4, PFN1, CORO1A, PPP1CA, FLNA, HGS, NRBP1, PPP2R1A, AKT1	C0vsB0	Non-protected
124	LI.M32.1_platelet activation (II)	0.000260213	0.00240901	0.767767	2.35185	0	21	ZYX, TLN1, NBEAL2, GNB2, TGFB1, MLF2, ACAP1, GNAI2, AP2M1, SIPA1, MAP2K2, ACTN4, PFN1, FLNA, DNM2, PKN1, HGS, MAP7D1, AKT1, PNPLA6	C0vsB0	Non-protected
125	LI.M32.2_CORO1A-DEF6 network (I)	0.000770218	0.00394405	0.637925	1.93923	2	20	STXBP2, TGFB1, ACAP1, UBE2M, TSC2, SIPA1, CLPTM1, CORO1A, HGS, DEF6, ABHD17A, CCDC22, APEH, TECR, ATP5D	C0vsB0	Non-protected
126	LI.M32.3_KLF12 targets network	0.000249439	0.00240901	0.744129	2.16224	0	17	POR, RHOG, NBEAL2, GNB2, ACAP1, GNAI2, UBE2M, NR1H2, CLPTM1, CORO1A, CNOT3, HGS, NRBP1, PPP2R1A	C0vsB0	Non-protected
127	LI.M33_inflammatory response	0.000717189	0.0037594	0.796963	2.03978	2	11	FCER1G, APOBR, TLR4, ARRB2, TBC1D8, GPX1, TYROBP, TNFSF13, AIF1, CARD9, STAB1	C0vsB0	Non-protected
128	LI.M37.0_immune activation - generic cluster	0.000672948	0.00370121	0.498138	2.50179	0	308	CD177, HP, LRG1, MMP9, STK32B, PROK2, GPR84, ANXA3, DYSF, F5, ACSL1, GPR97, QPCT, MANSC1, SLC26A8, CEACAM1, CR1, NFE2, AQP9, ROPN1L, ITGAM, MGAM, STEAP4, MGST1, LY96, FPR2, CXCR2, TLR5, KCNJ15, ANPEP, PYGL, BASP1, PLXDC2, CRISPLD2, LRP1, IL1R2, SLC22A4, NCF4, HCAR3, DOK3, PADI2, IL1R1, MARC1, OSCAR, CHI3L1, CYP4F3, CACNA2D3, MYO7B, EMILIN2, CDA, RASGRP4, FOLR3, LILRA5, RBP7, PFKFB4, IMPA2, SIRPB1…	C0vsB0	Non-protected
129	LI.M37.1_enriched in neutrophils (I)	0.000293427	0.00240901	0.863145	3.2882	0	51	LRG1, ALPL, PROK2, DGAT2, GPR97, MANSC1, MME, NFE2, CXCR1, FFAR2, MGAM, STEAP4, FPR1, FPR2, KCNJ15, PYGL, BASP1, SLC22A4, NCF4, FCGR2A, RNF24, HCAR3, MSRB1, CHI3L1, CYP4F3, C5AR1, CSF3R, CDA, PFKFB4, VNN2, FCGR3B, TNFRSF10C, TREM1, ST6GALNAC2, NLRP12, PTAFR, GLT1D1, S100P, CMTM2, KRT23, CREB5, G0S2, MXD1, ORM1, LRRC4, VNN3	C0vsB0	Non-protected
130	LI.M42_platelet activation (III)	0.00188324	0.00726392	0.789414	1.90272	7	9	FCER1G, LYN, GNA15, VAV1, LCP2, SYK, GNAQ, PLCG2	C0vsB0	Non-protected
131	LI.M47.0_enriched in B cells (I)	0.000306843	0.00240901	-0.607645	-1.99726	1	44	E2F5, PCDH9, FCRL1, FCRL5, STAP1, MS4A1, CR2, KIAA0125, FCRL2, KLHL14, AFF3, FAM129C, TCF4, PPAPDC1B, CXCR5, ABCB4, BTLA, P2RX5, TCL1A, PAX5, PLEKHG1, PKIG, CD79B, CD72, BLK, TSPAN13, FCRLA, BANK1, CD19, CD79A, CD22, EBF1, VPREB3, RALGPS2, CD200, BCL11A	C0vsB0	Non-protected
132	LI.M47.1_enriched in B cells (II)	0.00110254	0.00536808	-0.598827	-1.85537	6	33	FCRL5, PAWR, MS4A1, CR2, TPD52, KIAA0125, BLNK, DENND5B, KLHL14, KLF8, TCF4, CXCR5, TCL1A, POU2AF1, PAX5, PLEKHG1, CELSR1, PKIG, CD79B, FCRLA, BANK1, CD19, CD79A, EBF1, SP140, RALGPS2, BCL11A, HLA-DOB	C0vsB0	Non-protected
133	LI.M49_transcription regulation in cell development	0.000289268	0.00240901	0.529644	1.95814	0	45	ACHE, SPTA1, TMOD1, KLF1, BASP1, EPB42, GATA1, TAL1, VCAN, SEMA4A, SOD2, ANK1, TIMP2, ARHGEF12, LYN, TRIP13, FES, RXRA, TYROBP, GSN, PLXNB2, LST1	C0vsB0	Non-protected
134	LI.M56_suppression of MAPK signaling	0.0002405	0.00240901	0.906831	2.38636	0	12	CD14, IL1R2, DUSP1, IL1B, CACNA2D3, RASGRP4, HSPA6, ARRB2, DUSP3, FOS	C0vsB0	Non-protected
135	LI.M63_regulation of localization (GO)	0.000721501	0.0037594	0.780155	2.053	2	12	STXBP2, TGFB1, ARHGDIA, TSC2, NR1H2, MAP2K2, ARAP1, NAPA, FLNA, PKN1, SNX17, AKT1	C0vsB0	Non-protected
136	LI.M64_enriched in activated dendritic cells/monocytes	0.000246609	0.00240901	0.849499	2.37322	0	15	IL1RN, FAM129A, ANPEP, BASP1, IL1B, SIRPA, SOD2, CXCL1, SLC15A3, IL13RA1, NINJ1, G0S2	C0vsB0	Non-protected
137	LI.M69_enriched in B cells (VI)	0.00130997	0.00589487	-0.665757	-1.85309	7	20	PCDH9, FCRL1, MS4A1, CR2, FCRL2, PPAPDC1B, CXCR5, ABCB4, BTLA, P2RX5, CD79B, CD72, TSPAN13, CD19, CD79A, CD22	C0vsB0	Non-protected
138	LI.M73_enriched in monocytes (III)	0.0012025	0.00566893	0.755434	1.98795	4	12	CEBPB, PLXDC2, HCAR3, TIMP2, CCR1, IER3, FOS, BCL6, MAML3	C0vsB0	Non-protected
139	LI.M81_enriched in myeloid cells and monocytes	0.000273299	0.00240901	0.812404	2.78139	0	32	ITGA2B, F5, CD14, THBS1, EGF, FCER1G, SELP, MMRN1, CHI3L1, CLU, SNCA, ACTN1, SPARC, TLR4, CLEC5A, CSF1R, PRAM1, PCSK6, FKBP1B, PROS1, ITGB3, NLRP3, SLC8A1, PDGFA, BCL6, PTGS1	C0vsB0	Non-protected
140	LI.M85_platelet activation and degranulation	0.00047081	0.00280045	0.889641	2.14429	1	9	SERPINE1, SERPINA1, THBS1, TIMP1, CLU, FN1, SPARC, VWF	C0vsB0	Non-protected
141	LI.M87_transmembrane transport (I)	0.000259538	0.00240901	0.785735	2.44771	0	22	AQP1, AQP9, SLC4A1, TLR2, SLC22A4, ATP1B2, HMOX1, SLC11A1, HK3, ABCG2, TLR4, SLC15A3, NLRP3, VDR, CD36	C0vsB0	Non-protected
142	LI.M95.0_enriched in antigen presentation (II)	0.00155723	0.00651404	0.587997	1.83172	5	22	ITGAM, ITGB2, SELL, SLA, HCLS1, EVI2B, CD53, ITGAL, PLEK, AIF1, HLA-DRB1	C0vsB0	Non-protected
143	LI.M103_cell cycle (III)	0.00106626	0.00527799	-0.545885	-1.83702	6	50	BUB1B, CCNB2, CDC6, CCNE2, E2F5, CDK1, CDC45, CCNA2, MAD2L1, RBL1, CDC20, BUB1, CDKN2A, CCNB1, SKP2, PLK1, CCNE1	C0vsB0	Non-protected
144	LI.M118.0_enriched in monocytes (IV)	0.000301386	0.00240901	0.689709	2.68103	0	56	DYSF, F5, ACSL1, MGAM, STEAP4, LY96, PADI4, CXCR2, IL1R2, PGD, HCAR3, DOK3, MPP1, MARC1, EMILIN2, LTBR, TLR1, MYO1F, SMARCD3, HAL, AMICA1, AGPAT9, TMEM176B, CD68, BCL6, TNFRSF1B, DPYD, VNN1, NAIP, TNFSF13B, EVI5, LGALS3, CARD9, EMR1, LYZ, NACC2	C0vsB0	Non-protected
145	LI.M118.1_enriched in monocytes (surface)	0.000247647	0.00240901	0.70344	2.00304	0	16	STEAP4, IL1R2, SLC16A3, LTBR, NFAM1, AGPAT9, TMEM176B, TNFRSF1B, TNFSF13B, S1PR3, EMR1, MCTP1	C0vsB0	Non-protected
146	LI.M124_enriched in membrane proteins	0.000249439	0.00240901	0.785003	2.28101	0	17	HP, ALAS2, PROK2, AQP1, SLC4A1, C5AR1, SNCA, NEDD4L, ABCG2, C3AR1, TGM2, LTF	C0vsB0	Non-protected
147	LI.M132_recruitment of neutrophils	0.000478126	0.00280045	0.855784	2.19033	1	11	PROK2, CXCR1, FFAR2, FPR1, FPR2, HCAR3, C5AR1, PTAFR, F2RL1, GNG10	C0vsB0	Non-protected
148	LI.M139_lysosomal/endosomal proteins	0.00239063	0.0083618	0.728921	1.86563	9	11	CTSD, SORT1, PSAP, SLC11A1, GAA, CD68, CTSB, NPC2, CTSS, CTSH	C0vsB0	Non-protected
149	LI.M155_G protein coupled receptors cluster	0.00213119	0.00762605	0.768637	1.90756	8	10	PTH2R, FPR1, FPR2, LTB4R, PTAFR, C3AR1	C0vsB0	Non-protected
150	LI.M156.0_plasma cells & B cells, immunoglobulins	0.00194837	0.00726432	-0.653328	-1.84006	11	21	IGJ, TNFRSF17, E2F5, PCDH9, FCRL1, STAP1, IGLL5, FCRL2, CD52, ITM2C, ABCB4, P2RX5	C0vsB0	Non-protected
151	LI.M163_enriched in neutrophils (II)	0.000480885	0.00280045	0.79257	2.13185	1	13	MBOAT7, NPL, BTNL8, IMPA2, HSPA6, BEST1, FRAT2, DENND3, TYROBP, ARAP3	C0vsB0	Non-protected
152	LI.M167_enriched in cell cycle	0.000246609	0.00240901	0.756357	2.11301	0	15	STRADB, CDC34, BCL2L1, TGFB1, RBM38, TSC2, GSPT1, FLNA, DNM2, PPP2R1A, PSMD3, AKT1	C0vsB0	Non-protected
153	LI.M168_enriched in dendritic cells	0.000251193	0.00240901	0.701445	2.07604	0	18	PGD, IL1R1, EMILIN2, CTSL, CLEC5A, FAM20C, AGPAT9, ADAM9, DAB2, CAPG, CTSB, CA2, RRAGD, TACSTD2, B3GNT5	C0vsB0	Non-protected
154	LI.M171_heme biosynthesis (I)	0.00143438	0.00617406	0.752942	1.92711	5	11	ALAS2, TMOD1, PLEK2, GATA1, AHSP, HEMGN, HMBS, FECH	C0vsB0	Non-protected
155	LI.M196_platelet activation - actin binding	0.00197287	0.00726432	0.662406	1.85054	7	15	ITGA2B, THBS1, MPL, ABLIM3, PROS1, ITGB3, ITGB5, MFAP3L, TPM4, TPM1, PDE5A, ASAP2	C0vsB0	Non-protected
156	LI.M209_lysosome	0.00117702	0.00563833	0.827035	1.99339	4	9	SORT1, PSAP, CTSL, GNS, CD68, CTSB, GM2A, CTSZ	C0vsB0	Non-protected
157	LI.M215_small GTPase mediated signal transduction	0.00198118	0.00726432	0.664272	1.89151	7	16	RHOG, ARHGAP9, RAC2, VAV1, FGD3, ARHGDIA, GMIP, ARAP1, ARHGAP4, ARHGAP25, ARHGDIB, ARHGAP15, HMHA1, ARHGAP30	C0vsB0	Non-protected
158	LI.S4_Monocyte surface signature	0.000343407	0.00242838	0.720427	3.06178	0	91	FCGR1B, DYSF, ITGAM, MGAM, STEAP4, FPR1, FPR2, TLR5, CD163, LRP1, IL1R2, TLR2, MBOAT7, FCGR2A, HCAR3, SLC16A3, CECR6, LILRB3, GPER1, C5AR1, CSF3R, ANO10, LPPR2, LTBR, SIRPB1, VNN2, TLR1, SLC11A1, CCR1, TREM1, FCGRT, TLR4, SIGLEC9, PTAFR, MARCO, C10orf54, EMR2, AMICA1, IL6R, NFAM1, SLC46A2, ASGR2, P2RX1, KCNQ1, AGTRAP, P2RY13, FCAR, APCDD1, CD93, ASGR1, GPR133, CD36, TNFRSF1B, LILRB2, PYCARD, PLXN…	C0vsB0	Non-protected
159	LI.S5_DC surface signature	0.00197368	0.00726432	0.397144	1.63077	5	76	COLEC12, SLC1A3, FZD5, GRINA, IL1R1, ATP1B2, TGFA, TMEM158, CCRL2, ABCC3, CXCL16, LAMP2, SUCNR1, PRRG4, ADAM9, CD151, CSF2RB, PTGFRN, TSPAN33, LHFPL2, PPAP2B, CLDN23	C0vsB0	Non-protected
160	DC.M1.1_Platelets	0.000332557	0.00240901	0.640137	2.64198	0	78	SLC8A3, ITGA2B, SAMD14, SEC14L5, EGF, FSTL1, SELP, MMRN1, MPL, NT5M, ABCC3, GNAZ, ABLIM3, SLC24A3, SPARC, NRGN, CALD1, TREML1, SEPT5, CABP5, MYL9, TFPI, CTDSPL, VWF, SPOCD1, RBPMS2, PROS1, CTTN, DAB2, TSPAN33, CLDN5, ITGB5, PTGS1, F13A1, CMTM5, PPBP, TSPAN9, TMEM40, BEND2, SH3BGRL2, GP9, SYTL4, TNFSF4, MGLL, PARVB, ALOX12, PF4V1, ENDOD1	C0vsB0	Non-protected
161	DC.M1.2_Interferon	0.00128638	0.00589487	-0.650767	-1.88769	7	24	IFI44L, RSAD2, IFI44, IFIT1, ISG15, OAS3, HERC5, LAMP3, OTOF, RTP4, HES4, XAF1, MX1, OAS2, EPSTI1, LY6E	C0vsB0	Non-protected
162	DC.M2.3_Erythrocytes	0.000314861	0.00240901	0.769031	3.06291	0	64	ALAS2, SLC6A9, SLC6A8, NPRL3, RNF182, IFIT1B, SELENBP1, TMOD1, PLEK2, KLF1, GPR146, FAM210B, TNS1, SLC4A1, EPB42, GMPR, CA1, AHSP, IGF2BP2, BSG, OSBP2, TMCC2, BCL2L1, KRT1, ANK1, SNCA, TRIM58, DYRK3, ARHGEF12, CCDC176, TSTA3, CMBL, CHPT1, MARCH8, SLC7A5, HBD, RBM38, HMBS, CTNNAL1, MXI1, BPGM, TGM2, TRIM10, GYPE	C0vsB0	Non-protected
163	DC.M3.1_Erythrocytes	0.000324675	0.00240901	0.795734	3.223	0	71	VWCE, MYL4, SPTA1, ESPN, KEL, RUNDC3A, STRADB, GYPC, SLC25A39, HBQ1, DMTN, UBXN6, ST6GALNAC4, GRINA, ADIPOR1, TESC, FBXO7, GUK1, PLVAP, PDZK1IP1, R3HDM4, GATA1, RAB3IL1, DPM2, PHOSPHO1, CDC34, MAP2K3, TSPAN5, MCOLN1, TMEM86B, MBNL3, BCL2L1, HAGH, TMEM63B, ATP6V0C, ASCC2, FAXDC2, TPGS2, SLC25A37, DCAF12, PBX1, TMPRSS9, CARM1, AP2A1, HMBS, MXI1, GLUL, HPS1, PSMF1, MKRN1, TGM2	C0vsB0	Non-protected
164	DC.M3.2_Inflammation	0.000377358	0.00254717	0.829816	3.67171	0	115	ST3GAL4, PROK2, DGAT2, DHRS13, DYSF, F5, ACSL1, GPR97, QPCT, MANSC1, PFKFB3, SLC2A3, SLC26A8, MME, AQP9, ROPN1L, CST7, ITGAM, IL1RN, STEAP4, FAM129A, CEBPB, LY96, B4GALT5, PADI4, FPR2, KCNJ15, SERPINA1, FLOT2, PYGL, ZNF438, BASP1, CRISPLD2, PHC2, MMP25, FLOT1, MRVI1, SLC22A4, PDLIM7, NCF4, FCGR2A, ALOX5, RNF24, PGD, HCK, FUT7, APMAP, S100A11, CD55, CEBPD, SLC37A3, MSRB1, OSCAR, DUSP1, SRPK1, SEMA…	C0vsB0	Non-protected
165	DC.M3.3_Cell Cycle	0.000152742	0.00240901	-0.638698	-2.13277	0	48	HMMR, MELK, CEP55, ASPM, CCNB2, CENPA, KIAA0101, TIMD4, CKS2, CDK1, DLGAP5, CENPN, CCNA2, PLK4, GINS2, CDT1, RRM2, CDC20, STIL, BUB1, CDKN3	C0vsB0	Non-protected
166	DC.M3.5_Cell Cycle	0.00026264	0.00240901	-0.440661	-1.75865	1	145	RPP40, ZNF621, MRPL32, CRYZ, MANEA, ORC5, WDR92, MTX2, KIAA0020, ZC3H8, RABGGTB, EXOSC6, COG6, MRPL46, TFB2M, ITFG2, ENOPH1, PDXP, RRP15, WDR4, TTC37, EEF1E1, ISOC1, MRPS30, PWP1, TGDS, SAAL1, PPIH, ZMYND19, ZNF664, MRPL50, NFX1, LSM7, WDR12, EBAG9, CCT2, PUS7, PIGP, TOMM5, GNL3, GNL2, HADH, PARP1, TIMM21, FAIM, PAICS, RTN4IP1, ICT1, MRPL39, MRPS33, POLR2H, LTV1, ACTL6A, YARS2, PDCD7, TFAM, MTERF…	C0vsB0	Non-protected
167	DC.M4.1_T cell	0.000151263	0.00240901	-0.671989	-2.29213	0	54	HPCAL4, SLC16A10, TRAT1, AXIN2, TBC1D4, TXK, KLHL3, ICOS, CD28, LRRN3, EPHA4, FAM134B, OXNAD1, SH3YL1, BACH2, ADTRP, PASK, FAM84B, ATP8B2, GPR183, ARMCX2, BCL2, TNFRSF25, HOOK1, CCDC64, IL7R, DOCK9, TCF7, EPHX2, LEF1, ID3, TESPA1, FAM102A, THNSL1, BCL11B, MAN1C1, CD40LG, FAIM3, TCEA3	C0vsB0	Non-protected
168	DC.M4.2_Inflammation	0.000279955	0.00240901	0.840578	3.01425	0	39	LRG1, MMP9, SOCS3, ALPL, ANXA3, KREMEN1, CR1, OPLAH, OSM, S100A12, MGAM, NSUN7, CASP5, TLR5, SERPINA1, CYSTM1, IL1R2, PLIN4, LMNB1, MCTP2, SIPA1L2, MAPK14, WDFY3, LIMK2, VNN2, PGLYRP1, SLC2A14, IL18RAP, S100P	C0vsB0	Non-protected
169	DC.M4.3_Protein Synthesis	0.00264057	0.00911918	-0.5517	-1.76224	16	38	RPL9, RPL17, ZFAND1, LRRC75A-AS1, RPS18, BOD1, ZNF22, EEF1B2, TOMM7, RPL26, TMEM42, EPB41L4A-AS1, SNRPD2, MCCC1, MPHOSPH10, HSF2, ZNF32, RPS14, ELP2, DDX18, RPS20, RPL5	C0vsB0	Non-protected
170	DC.M4.6_Inflammation	0.000377216	0.00254717	0.742254	3.24566	0	109	ALOX5AP, LITAF, CHSY1, ZYX, FCGR2A, SBNO2, APBB1IP, IL10RB, CD97, CSRNP1, GRN, IFNAR1, ATP6V0D1, SLC25A44, PHF21A, CYTH4, MVP, CTNNA1, RALB, YIPF1, IFITM2, STAT5B, MSRB2, STAT3, MIDN, GLIPR2, LAMP2, CHMP2A, CDK14, LAT2, SELL, IFNGR2, ITPRIP, LYN, DDAH2, SQRDL, MAPK3, FTH1, PIM3, LSP1, TCIRG1, PDK3, SNX11, ATF6, CYBA, GLA, P2RY13, STX10, NCSTN, THOC5, RAB24, CKLF, CASP4, MICU1, ZFP36, ATG7, VAMP3,…	C0vsB0	Non-protected
171	DC.M4.7_Cell Cycle	0.000139743	0.00240901	-0.605982	-2.27464	0	95	TRAF5, ZMYND11, NOC3L, ZNF84, SLC25A36, CYP4V2, SLC7A6, PURA, CLEC2D, SLC39A10, ATM, IFT74, C12orf29, PEX3, CEP290, SLC38A1, PREPL, ZNF529, CASD1, ANKRD46, MTR, CBLB, TYW3, POGLUT1, ZZZ3, LPIN1, XPO4, MPRIP, ZNF721, ZNF337, ARL14EP, KMT2A, SMAD5, NKRF, ZBTB9, LANCL1, TSHZ1, BMI1, FAM35A, ABCE1, SMARCAD1, SUN1, COQ10A, ZXDB, WDR75, SHQ1, ZNF559, MTAP, WDR36, AKAP11, SLAIN1, C2orf44, STK39, ZNHIT6,…	C0vsB0	Non-protected
172	DC.M4.10_B cell	0.000158629	0.00240901	-0.662893	-2.01691	0	30	E2F5, FCRL1, FCRL5, COBLL1, STAP1, MS4A1, KIAA0125, BLNK, FCRL2, AFF3, CNTNAP2, FAM129C, CXCR5, TCL1A, CD79B, OSBPL10, CD72, BLK, TSPAN13, CCR6, FCRLA, BANK1, CD19, CD79A, EBF1, VPREB3	C0vsB0	Non-protected
173	DC.M4.11_Plasma Cells	0.00181917	0.00720393	-0.904838	-1.72868	9	5	IGJ, TNFRSF17, GLDC, TXNDC5, CD38	C0vsB0	Non-protected
174	DC.M4.13_Inflammation	0.000328947	0.00240901	0.801861	3.29264	0	76	HLX, CXCR1, FAM129A, FPR1, TLE3, CXCR2, TNFRSF1A, MBOAT7, PDLIM7, NCF4, LRP10, IL1B, MTHFS, PANX2, SPI1, C5AR1, PFKFB4, LPPR2, SIRPB1, ASAP1, ACTN1, XPO6, SLC19A1, TNFRSF10C, ZDHHC18, ST6GALNAC2, FRAT2, LAMP2, NLRP12, TSEN34, FAM53C, CHST15, UBTD1, CXCL1, TBC1D14, SDCBP, IL13RA1, EMR2, C1RL, SKAP2, NINJ1, FOS, FRAT1, AGPAT9, MXD1, DENND3, P2RY13, ACOX1, TREML2, SIRPD, CTBS, NUMB, VNN3, SMAP2, PAC…	C0vsB0	Non-protected
175	DC.M4.14_Monocytes	0.00030248	0.00240901	0.500948	1.95299	0	57	VCAN, HMOX1, VENTX, CSF1R, SLC46A2, LPAR1, FZD2, CST3, ASGR1, FBP1, PLXNB2, CD36, NAGA, TNS3, KIAA1598, KYNU, CYBB, SLC2A6, TGFBI, CARD9, S1PR3, DHRS4L2, FAM198B, GPBAR1, SLC27A1, ALDH2, CD86, SCIMP, SLC7A7, LILRB1, DPYSL2, OAF, CD1D, LY86, CECR1, RIN2, MTMR11	C0vsB0	Non-protected
176	DC.M4.15_T cells	0.000310366	0.00240901	-0.610027	-1.97383	1	41	MTX3, TC2N, GRPEL2, SH2D1A, ZNF831, DYRK2, KLF12, ITM2A, THEMIS, RASGRP1, GPR18, OCIAD2, PLEKHA1, ITK, S1PR1, LY9, PLCG1, MORC4, CD27, ARL4C, LBH, LCK, PRKCH, PRKCQ, ZAP70, NMT2, GZMK, TRMT11, CD5, ZNF256, CHMP7	C0vsB0	Non-protected
177	DC.M5.1_Inflammation	0.000549149	0.00313648	0.612059	2.97023	0	228	LPCAT3, RHOG, GRN, NARF, TUBA1A, TXN, CTDP1, KIAA0040, PXN, IRF2BPL, ALDOA, CCR1, NDEL1, AGPAT2, CFP, ACTB, ATP6V0B, IGSF6, PRR13, ZNF319, CHMP2A, OS9, CNN2, PTAFR, GNS, TMEM185B, ACSS2, SLC15A3, NDRG1, GNA15, FOSL2, NRD1, ATP6AP1, IGFLR1, ARID3A, FKBP1A, RENBP, NANS, HCLS1, DTX2, C20orf24, ATP6V1C1, ZNF787, USP9X, ATP6V0E1, PSENEN, RPS6KA1, RAC2, GNAI2, RABAC1, FERMT3, ZDHHC3, EHD1, CD53, OSTF1,…	C0vsB0	Non-protected
178	DC.M5.7_Inflammation	0.00040016	0.00264106	0.6411	2.88907	0	132	IGF2R, CPD, PLXDC2, CPQ, ICAM3, DHRS12, IMPA2, S100A4, SLC44A2, CXCL16, FCGRT, PIK3CD, TRIM8, SULT1A1, HSPA1L, ARHGAP9, TBL1X, PGM1, PPT1, SPATA2L, AMICA1, EXTL3, RNASET2, MAP4K4, TMCC3, IQGAP1, RNF130, CNPY3, DHRS7, H3F3B, ZNF746, KIAA0247, HLA-E, CD93, NCOA1, IDS, TMCO3, ATP6V1A, EGLN1, RAB27A, PYCARD, RBPJ, PRMT5, ADAM19, MBP, HSD17B11, HPSE, STAT6, ITM2B, KDM5B, HSDL2, LMBRD1, PTPRE, TPRG1L, …	C0vsB0	Non-protected
179	DC.M5.12_Interferon	0.0015124	0.0064169	0.455345	1.7752	4	57	C1QA, TMEM140, TRIM25, IFI16, TYMP, GADD45B, ETV7, ZNFX1, ASPRV1, NTNG2, LHFPL2, GBP2, ADAR, TRAFD1, TRIM21, IRF9, TAP1, RHBDF2, NMI, CASP1, DYNLT1, ABCA1, ACTA2, TRANK1, UNC93B1, RBCK1, ZC3HAV1, BST2, SP110, TAP2, TCN2	C0vsB0	Non-protected
180	DC.M6.6_Apoptosis / Survival	0.000289436	0.00240901	0.703812	2.6455	0	48	CD14, OSGIN1, IL4R, GALK1, CTSD, MAP3K6, EMILIN2, TSPO, SLC43A2, SMARCD3, FAM129B, GABARAP, MARCO, SLC9A1, FCN1, C3AR1, DUSP3, NAPRT1, MOB3A, UPP1, EPN1, EXT1, IFI30, GRAMD1A, ST3GAL2, BCKDK, RAB32, TPD52L2, CAPG, CD300C, TNFSF13, TBC1D2, TNFRSF1B, SIPA1L1, FADD, CIDEB, DEDD2, PPM1M	C0vsB0	Non-protected
181	DC.M6.11_Cell Cycle	0.000164826	0.00240901	-0.765231	-2.09963	0	19	KIF15, POLQ, BUB1B, CCNE2, NUF2, KIF14, CENPW, ZWINT, POLE2, KIF2C, CDCA3, CCNB1	C0vsB0	Non-protected
182	DC.M6.13_Cell Death	0.000287026	0.00240901	0.732378	2.69734	0	44	NTSR1, RAB20, BCL3, FCER1G, PLIN3, VPS9D1, LILRB3, GNB2, STK3, RASGRP4, HSPA6, SERPINB1, VASP, EIF4E3, HK3, LAMP2, UBN1, SIGLEC9, FNDC3B, LILRA2, LRRC25, FES, STX11, NLRP3, NCF1, TBC1D8, PILRA, CARD6, MNDA, DRAM1, NFKBIA, TMEM154, CPEB4, NLRC4	C0vsB0	Non-protected
183	DC.M6.16_Cell Cycle	0.000159541	0.00240901	-0.704261	-2.12362	0	29	DSCC1, ERCC6L, RAD51AP1, CDCA2, TROAP, ATAD2, MAD2L1, PSAT1, SGOL1, CCNF, CENPF, OIP5, UBE2T, TIPIN, GMNN, FBXO5, SMC2	C0vsB0	Non-protected
184	DC.M7.1_Inflammation	0.000457875	0.00280045	0.671921	3.15667	0	172	MSRA, RTN2, IMPDH1, TLN1, TMEM119, HRH2, TIMP1, TALDO1, CTSA, LTBR, RAB3D, APOBR, TIMP2, C17orf62, PKM, SH2B2, ARHGAP26, RAB38, S1PR4, MYH9, GBGT1, CDKN2D, LRPAP1, CAPN1, ULK1, PPP1R15A, SEMA4B, PLP2, FAM20C, DENND1A, WAS, METRNL, GPSM3, PLD1, KDM4B, RHBDD2, PAM, PLEKHO2, NCKAP5L, LSP1, CUX1, GAPDH, TNIP1, UBA1, MLF2, G6PD, RARA, WDR13, SLC9A8, CDC42EP4, SHISA5, MBD6, BCORL1, PICALM, PPP4C, PLEKH…	C0vsB0	Non-protected
185	DC.M9.42_Cell Cycle	0.00166861	0.00678874	-0.704552	-1.87836	9	17	DEPDC1B, KIAA0101, CDC45, GINS4, RGS1, NPTX1, CASC5, ATAD5, SKP2, E2F7, C16orf59, ESPL1, WDR90, LRP8	C0vsB0	Non-protected
186	LI.M7.2_enriched in NK cells (I)	0.000137287	0.00729658	0.735622	2.24755	0	45	KLRF1, MYBL1, KLRC1, GZMA, PTGDR, RORA, GZMB, FGFBP2, KLRD1, XCL1, FASLG, SAMD3, S1PR5, KLRB1, CLIC3, KLRK1, GZMH, GNLY, NLRC3, TBX21, STAT4, IL2RB, EOMES, GPR56, TGFBR3, PRF1, PLEKHF1, NKG7, HOPX, SH2D2A, CTSW, SLAMF7	C1vsC0	Non-protected
187	LI.M11.0_enriched in monocytes (II)	0.000878735	0.00899945	-0.449709	-2.0716	0	184	FCGR1A, QPCT, ALOX5, NFE2, S100A11, ITGAM, FCGR1B, PYGL, SPI1, CDA, AQP9, SECTM1, FCGR2A, MSRB1, RBM47, FPR2, PLXDC2, VNN3, IMPA2, HSPA6, HCK, CD14, NOD2, CSF3R, PADI2, APOBR, TREM1, VNN2, FPR1, ZNF467, CEBPD, NCF1, LAT2, SERPINA1, GCA, FCGRT, C5AR1, GLT1D1, NLRP12, LILRB3, LILRA6, LYN, TLR4, CCR1, GRN, CHST15, SLC11A1, SIRPB1, MGST1, SIRPA, ANPEP, CD163, TLR8, TLR2, HK3, BST1, PTAFR, CFP, LRP1, …	C1vsC0	Non-protected
188	LI.M16_TLR and inflammatory signaling	0.000367918	0.00729658	-0.70077	-2.52747	0	45	FCGR1A, DYSF, PADI4, ALOX5, MGAM, NFE2, FCGR1B, CXCR2, AQP9, KCNJ15, FPR2, HSPA6, NCF4, WDFY3, CSF3R, APOBR, FPR1, NPL, C5AR1, LILRB3, LILRA6, TLR4, ANPEP, TLR1, TLR8, TLR2, BST1, TLR5, P2RY13, MYD88, PILRA, FCAR, FES	C1vsC0	Non-protected
189	LI.M32.0_platelet activation (I)	0.000301114	0.00729658	-0.727515	-2.23109	0	23	POR, GNB2, ZYX, TLN1, NR1H2, ACAP1, NUCB1, CORO1A, GNAI2, PPP2R1A, TGFB1, HGS, PPP1CA, AKT1, PFN1, UBE2M, ACTN4, NRBP1	C1vsC0	Non-protected
190	LI.M32.1_platelet activation (II)	0.00029577	0.00729658	-0.732789	-2.20843	0	21	GNB2, ZYX, TLN1, ACAP1, NBEAL2, MLF2, GNAI2, DNM2, TGFB1, SIPA1, HGS, MAP2K2, AKT1, AP2M1, PFN1, ACTN4, MAP7D1, PKN1	C1vsC0	Non-protected
191	LI.M32.3_KLF12 targets network	0.000281136	0.00729658	-0.772059	-2.19779	0	17	POR, GNB2, RHOG, NR1H2, ACAP1, NBEAL2, CNOT3, CORO1A, CLPTM1, GNAI2, PPP2R1A, HGS, UBE2M, NRBP1	C1vsC0	Non-protected
192	LI.M37.1_enriched in neutrophils (I)	0.000385208	0.00729658	-0.862725	-3.20745	0	51	ALPL, CHI3L1, PROK2, LRG1, MANSC1, GPR97, BASP1, DGAT2, G0S2, MME, ST6GALNAC2, MGAM, FFAR2, NFE2, PYGL, CXCR1, CDA, KCNJ15, STEAP4, FCGR2A, MSRB1, SLC22A4, KRT23, TNFRSF10C, FPR2, VNN3, S100P, RNF24, NCF4, FCGR3B, CSF3R, TREM1, VNN2, FPR1, CYP4F3, HCAR3, C5AR1, PFKFB4, MXD1, GLT1D1, NLRP12, ORM1, LRRC4, EMR3	C1vsC0	Non-protected
193	LI.M61.0_enriched in NK cells (II)	0.000156961	0.00729658	0.776091	1.90174	0	15	KLRF1, KIR2DL3, S1PR5, KLRB1, KLRK1, KIR3DL1, IL2RB, GPR56, TGFBR3, NKG7, KIR2DL1	C1vsC0	Non-protected
194	LI.M64_enriched in activated dendritic cells/monocytes	0.000550812	0.00729658	-0.740714	-2.03444	1	15	BASP1, IL1RN, G0S2, SOD2, FAM129A, IL1B, SIRPA, ANPEP	C1vsC0	Non-protected
195	LI.M118.0_enriched in monocytes (IV)	0.000397614	0.00729658	-0.567459	-2.1494	0	56	F5, DYSF, PADI4, MGAM, ACSL1, CXCR2, PGD, STEAP4, DOK3, MARC1, HCAR3, LTBR, MYO1F, IL1R2, BCL6, AGPAT9, HAL, TLR1, AMICA1, EVI5, EMILIN2, MPP1, PTX3	C1vsC0	Non-protected
196	LI.M124_enriched in membrane proteins	0.000562272	0.00729658	-0.707137	-2.01298	1	17	HP, ABCG2, PROK2, ELANE, LTF, C5AR1	C1vsC0	Non-protected
197	LI.M132_recruitment of neutrophils	0.000260892	0.00729658	-0.856033	-2.1546	0	11	PROK2, FFAR2, CXCR1, FPR2, FPR1, HCAR3, C5AR1, F2RL1, PTAFR, CCR3	C1vsC0	Non-protected
198	LI.M163_enriched in neutrophils (II)	0.000538213	0.00729658	-0.759458	-2.00427	1	13	MBOAT7, IMPA2, HSPA6, FRAT2, NPL, BTNL8, TSPAN2, BEST1, DENND3, TYROBP, CFD, ARAP3	C1vsC0	Non-protected
199	LI.M215_small GTPase mediated signal transduction	0.000558659	0.00729658	-0.760714	-2.12981	1	16	RHOG, ARHGAP15, RAC2, FGD3, ARHGAP9, TAGAP, ARHGDIB, ARHGDIA, VAV1, ARHGAP25, GMIP, HMHA1, ARAP1, ARHGAP30	C1vsC0	Non-protected
200	LI.S4_Monocyte surface signature	0.000513347	0.00729658	-0.512202	-2.12008	0	91	DYSF, MGAM, MBOAT7, ITGAM, FCGR1B, STEAP4, FCGR2A, FPR2, ANO10, CSF3R, TREM1, VNN2, FPR1, HCAR3, SLC16A3, FCGRT, LTBR, C5AR1, IL1R2, LILRB3, LPPR2, IL6R, TLR4, CCR1, CECR6, SLC11A1, SIRPB1, NFAM1, CD163, BRI3, TLR1, TLR2, AMICA1, PTAFR, LRP1, TLR5, P2RY13, KCNQ1, C10orf54, EMR2, FCAR	C1vsC0	Non-protected
201	DC.M3.2_Inflammation	0.000589623	0.00729658	-0.810168	-3.47567	0	115	PFKFB3, PROK2, MANSC1, F5, DHRS13, ST3GAL4, DYSF, GPR97, BASP1, SLC37A3, DGAT2, FLOT2, CD55, MRVI1, SLC2A3, IL1RN, PADI4, MME, B4GALT5, TRIB1, SRPK1, QPCT, SOD2, ALOX5, ACSL1, MMP25, SLC26A8, FAM129A, TGFA, S100A11, ITGAM, PYGL, CDA, AQP9, PGD, KCNJ15, FLOT1, STEAP4, ROPN1L, CEBPB, FCGR2A, MSRB1, SLC22A4, FPR2, APMAP, PHC2, SULT1B1, RNF24, USB1, NCF4, HCK, FUT7, NFIL3, EXOC6, CSF3R, PDLIM7, RFX2,…	C1vsC0	Non-protected
202	DC.M3.6_Cytotoxic/NK Cell	0.000138236	0.00729658	0.768084	2.33587	0	44	IFNG, KLRF1, GZMA, ZNF683, FCRL6, SYTL2, PRSS23, KIR3DL2, PPP2R2B, FGFBP2, KLRD1, FASLG, SAMD3, CLIC3, KLRK1, GZMH, CD160, GNLY, IL2RB, ABCB1, EOMES, GPR56, TGFBR3, PRF1, PLEKHF1, AUTS2, TSEN54, PYHIN1, NKG7, NCALD, SH2D2A, CTSW, MCOLN2, KIAA1671	C1vsC0	Non-protected
203	DC.M4.2_Inflammation	0.000350631	0.00729658	-0.790855	-2.75933	0	39	ANXA3, MMP9, ALPL, CR1, LRG1, SOCS3, LMNB1, KREMEN1, MGAM, OSM, CYSTM1, PLIN4, MCTP2, SLC2A14, PGLYRP1, LIMK2, SIPA1L2, IL18R1, NSUN7, MAPK14, S100P, WDFY3, VNN2, SERPINA1, IL1R2, OPLAH	C1vsC0	Non-protected
204	DC.M4.6_Inflammation	0.000574053	0.00729658	-0.710293	-3.01326	0	109	APBB1IP, LITAF, CHSY1, CSRNP1, SBNO2, PHF21A, ALOX5AP, CD97, YIPF1, SELL, CDK14, IFITM2, FCGR2A, IFNAR1, IL10RB, STAT5B, MIDN, MVP, RALB, ZYX, STAT3, CHMP2A, ZFP36, SLC25A44, ATP6V0D1, LAT2, LSP1, SQRDL, CYTH4, MSRB2, LYN, LAMP2, GLIPR2, ERO1L, GRN, ATF6, GNG5, MAPK3, CSNK1D, BRI3, PIM3, SNX11, HTATIP2, AKIRIN2, CHIC2, NCSTN, VAMP3, FAM65B, ITPRIP, C16orf72, CFLAR, IFNGR2, LYRM1, P2RY13, THOC5, P…	C1vsC0	Non-protected
205	DC.M4.7_Cell Cycle	0.000123533	0.00729658	0.523252	1.79813	0	95	C12orf29, CYP4V2, ZNF84, SLC25A36, NOC3L, SLC7A6, SMAD5, ZMYND11, CLEC2D, KMT2A, LPIN1, PURA, ANKRD46, TRAF5, CBLB, SMARCAD1, PEX3, CASD1, BMI1, ZNF721, POP5, PREPL, CEP290, SLC38A1, ZNF337, FAM35A, ATM, MPRIP, MTR, XPO4, DOCK10, AKAP11, ARL14EP, POGLUT1, SUN1, ANAPC1, ABCE1, WDR75, SLC39A10, ARMC1, COQ10A, WDR36, MTAP, GGA2, TSPAN3, TSHZ1, SHQ1, STK39, ZNF559, IFT74, NPAT, CA5B, TTC3, TSR1, NIFK…	C1vsC0	Non-protected
206	DC.M4.13_Inflammation	0.000462749	0.00729658	-0.750546	-3.00796	0	76	HLX, TLE3, ST6GALNAC2, LRP10, FAM129A, TNFRSF1A, MBOAT7, CXCR2, PANX2, SPI1, CXCR1, MTHFS, TREML2, ACTN1, TNFRSF10C, TSEN34, VNN3, NCF4, SDCBP, FRAT2, XPO6, IL1B, PDLIM7, FPR1, ZDHHC18, SVIL, C5AR1, PFKFB4, FRAT1, TBC1D14, CTBS, MXD1, AGPAT9, NLRP12, LPPR2, FOS, LAMP2, PACSIN2, C1RL, ACOX1, CHST15, SIRPB1, SLC19A1, USP10, ASAP1, GAB2, UBTD1, SKAP2, SMAP2, NUMB, FAM53C, DENND5A, P2RY13, MTMR3, DEN…	C1vsC0	Non-protected
207	DC.M5.7_Inflammation	0.00065703	0.00780552	-0.562019	-2.47147	0	132	IGF2R, CPD, ADAM19, ICAM3, PLXDC2, DHRS12, PIK3CD, IMPA2, TMCC3, MAP4K4, SLC44A2, HSDL2, TBL1X, FCGRT, H3F3B, SPATA2L, HSPA1L, CXCL16, EXTL3, CPQ, IDS, TRIM8, ARHGAP9, PGM1, VCPKMT, IQGAP1, TPRG1L, EGLN1, ITM2B, AMICA1, RAB27A, HLA-E, NCOA1, TMEM43, RGL2, CNPY3, RBPJ, PRMT5, RAF1, RNASET2, KLHL21, ZNF746, PPT1, PISD, TMX4, KDM5B, MBP, MAP2K4, STAT6, HSD17B11, PBX2, ATP6V1A, LMBRD1, TMCO3, UBE4B, …	C1vsC0	Non-protected
208	DC.M5.9_Protein Synthesis	0.000133869	0.00729658	0.633452	2.00231	0	55	RPL31, RPS24, PFDN5, RPS27, RPS15A, RPS3A, RPL39, RPS29, RPL27, RORA, MAP4K5, RPL35A, RPS10, RPL11, BRWD1, RPL30, RPS12, KLHDC2, RPS25, FAU, ATP5S, RPL6, RPS11, RPS8, MGST3, ZNF585A, NME3, TMEM14B	C1vsC0	Non-protected
209	DC.M5.12_Interferon	0.000798722	0.00875177	-0.486328	-1.84949	1	57	IFI16, TMEM140, GADD45B, IRF9, TRIM25, ADAR, NTNG2, ZC3HAV1, TRAFD1, GBP2, TRIM21, ZNFX1, ASPRV1, LHFPL2, NMI, TRANK1, ETV7, ACTA2, TAP1, SP110	C1vsC0	Non-protected
210	DC.M5.15_Neutrophils	0.000295159	0.00729658	-0.831607	-2.46821	0	20	HP, ELANE, CTSG, BPI, CAMP, LTF, TCN1, OLR1, AZU1, DEFA4, MPO, RETN, MMP8, ARG1	C1vsC0	Non-protected
211	DC.M6.6_Apoptosis / Survival	0.000752445	0.00859524	-0.539041	-1.97895	1	48	IL4R, CD14, GRAMD1A, SLC43A2, MOB3A, SIPA1L1, FADD, MAP3K6, FAM129B, TPD52L2, BCKDK, GABARAP, OSGIN1, CTSD, UPP1, EPN1, DEDD2, EXT1, RAB32, EMILIN2, GALK1, SLC9A1, TSPO	C1vsC0	Non-protected
212	DC.M6.13_Cell Death	0.000361272	0.00729658	-0.656341	-2.36044	0	44	BCL3, RAB20, NTSR1, GNB2, STK3, UBN1, EIF4E3, STX11, HSPA6, NCF1, VASP, PLIN3, SERPINB1, FNDC3B, LILRB3, HIST1H2BC, VPS9D1, RASGRP4, LAMP2, CARD6, HK3, FCER1G, PILRA, NFKBIA, MNDA, FES, LRRC25, LILRA2	C1vsC0	Non-protected
213	DC.M7.1_Inflammation	0.000825083	0.00875177	-0.572049	-2.61178	0	172	TMEM119, CHD7, S1PR4, PPP1R15A, WAS, MYADM, SEMA4B, PLD1, MYH9, MSRA, SH2B2, APOBR, IMPDH1, SLC9A8, ULK1, KDM4B, C17orf62, SHISA5, LSP1, SH3BP5L, ARHGAP26, TALDO1, UBA1, LTBR, PPP4C, TLN1, CARS, RARA, GPSM3, RHBDD2, GRK6, RAB3D, RAB1B, HRH2, MBD6, MLF2, CDKN2D, CAPN1, MAP1S, CHP1, PLP2, LRPAP1, PICALM, TMEM127, PAM, KCTD2, G6PD, TIMP1, RAB4B, PNRC1, CAPZB, PLEKHM1, TMEM8A, NCF2, AGO4, TIMP2, CPNE…	C1vsC0	Non-protected
214	DC.M8.46_Cytotoxic/NK	0.000159084	0.00729658	0.864793	2.04443	0	13	KLRC1, PTGDR, AKR1C3, KIR2DL3, KIR2DL4, SH2D1B, MYOM2, GZMB, KLRB1, PDGFD, KIR3DL1	C1vsC0	Non-protected
215	LI.M3_regulation of signal transduction	0.000255102	0.00187394	-0.62394	-2.27156	0	42	BMP2, FPR1, IL1RN, S100A12, TLR5, LRP1, C5AR1, TLR2, TIMP2, LYN, NOD2, CDK14, CCR1, WLS, BCL6, HMOX1, PRKCD, CSF1R, SULF2, SYK, ASAP2, PLXNB2, HPSE	C7vsC0	Non-protected
216	LI.M4.0_cell cycle and transcription	0.000420875	0.00235849	-0.431586	-2.19001	0	320	FCGR1A, FCGR1B, PADI4, CDKN3, SECTM1, CEBPD, PGLYRP1, FPR1, IL1RN, POC1A, LMNB1, S100A12, WDFY3, SERPINA1, CLEC4E, CD14, SEMA4A, ALOX5, S100A11, SPI1, APOBEC3B, MSRB1, LILRB3, AURKB, TYMP, GRN, HCK, GCA, PTAFR, FCGR2A, SLC11A1, CSF3R, E2F8, RBM47, HSPA6, KIF20A, CD163, NCAPG, SLC15A3, TLR4, CDC25A, CDCA5, NCF1, LILRA6, NLRP12, C5AR1, IGSF6, CSTA, SIRPA, CDCA8, BIRC5, FCER1G, TLR2, TIMP2, GLT1D1, …	C7vsC0	Non-protected
217	LI.M4.3_myeloid cell enriched receptors and transporters	0.000243487	0.00187394	-0.696768	-2.34992	0	30	SECTM1, SLC1A3, TLR5, CD14, AMICA1, SLC15A3, IGSF6, TLR8, CCR1, SIGLEC7, CHST15, SULF2, LRRC25, MYOF, SLC8A1, LILRA1, MARCO, ASGR1, RNASE6	C7vsC0	Non-protected
218	LI.M4.13_cell junction (GO)	0.000663277	0.00317731	-0.780034	-2.01432	2	11	HCK, FES, CTNNA1, LCP1, PRKCD, IFI30, PAK1, TNS3, HOMER3	C7vsC0	Non-protected
219	LI.M4.15_enriched in monocytes (I)	0.00154765	0.00609618	-0.720464	-1.8605	6	11	HCK, FES, APLP2, SLC31A2, TNFSF13, LGALS1, DPYSL2, EPB41L3	C7vsC0	Non-protected
220	LI.M5.0_regulation of antigen presentation and immune response	0.00111919	0.0049612	-0.418215	-1.72722	3	78	FCGR1B, FOS, TLR5, HCK, MAPK14, VASP, TLR4, LY96, FCER1G, TLR2, LYN, RPS6KA1, NFKBIA, LAT2, LILRB2, PAK1, CSK, TLR1, PTPN6, MNDA, SYK, IRAK3, LCP2, MYD88	C7vsC0	Non-protected
221	LI.M7.0_enriched in T cells (I)	0.000161551	0.00187394	0.568947	2.03843	0	54	RORA, TRAT1, ICOS, CD28, NLRC3, RASGRP1, SH2D1A, SAMD3, XCL1, CD3G, ITM2A, IL7R, GPR171, ITK, GZMA, NELL2, TIGIT, BCL11B, EOMES, CD96, PRKCQ, LEF1, ZAP70, PRKCH, GZMK, UBASH3A, CD247, ETS1, GATA3, LCK, KLRB1, CD6, GIMAP7, FLT3LG, MAL, CD3D, LAT, CD2	C7vsC0	Non-protected
222	LI.M7.1_T cell activation (I)	0.000163052	0.00187394	0.616158	2.14398	0	47	RORA, CAMK4, TXK, ICOS, CD28, NLRC3, RASGRP1, KLRK1, CD3G, MS4A1, THEMIS, ITPR3, IL7R, ITK, TIGIT, CD8B, BCL11B, EOMES, CRTAM, TCF7, PRKCQ, LEF1, RHOH, ZAP70, PTPN22, DPP4, CD8A, PRKCH, CD247, SLAMF1, GATA3, LCK	C7vsC0	Non-protected
223	LI.M11.0_enriched in monocytes (II)	0.000333667	0.00198198	-0.730517	-3.47713	0	184	FCGR1A, FCGR1B, PADI2, FPR2, CRISPLD2, SECTM1, CEBPD, FPR1, NFE2, CDA, AQP9, PYGL, ANPEP, S100A12, QPCT, TLR5, SERPINA1, FCAR, CLEC4E, CD14, NRGN, ALOX5, S100A11, TREM1, RBP7, ITGAM, SPI1, MSRB1, LILRB3, TYMP, GRN, HCK, GCA, LRP1, PTAFR, FCGR2A, SLC11A1, CSF3R, APOBR, MS4A4A, BST1, RBM47, HSPA6, CD163, SLC15A3, TLR4, ZNF467, NCF1, SIRPB1, LILRA6, LILRA5, NLRP12, VNN2, C5AR1, IGSF6, CSTA, SIRPA, H…	C7vsC0	Non-protected
224	LI.M11.1_blood coagulation	0.000232721	0.00187394	-0.791568	-2.44157	0	21	F5, SERPINA1, TREM1, ITGAM, AMICA1, SLC16A3, SIRPA, FCER1G, LYN, PSAP, F13A1, ITGAX, P2RX1, SYK, PLAUR	C7vsC0	Non-protected
225	LI.M11.2_formyl peptide receptor mediated neutrophil response	0.000218531	0.00187394	-0.88778	-2.16422	0	9	SECTM1, FPR1, FCGR2A, SLC11A1, IGSF6, PILRA, NCF2, PAK1	C7vsC0	Non-protected
226	LI.M16_TLR and inflammatory signaling	0.000257003	0.00187394	-0.850728	-3.14835	0	45	FCGR1A, FCGR1B, DYSF, PADI4, FPR2, KCNJ15, FPR1, NFE2, AQP9, CXCR2, MGAM, ANPEP, WDFY3, TLR5, FCAR, ALOX5, NCF4, LILRB3, CSF3R, APOBR, BST1, HSPA6, TLR4, LILRA6, C5AR1, LY96, TLR2, NPL, TLR8, FES, PILRA, ITGAX, SIGLEC9, TYROBP, P2RY13, LILRB2, TLR1, KCNJ2	C7vsC0	Non-protected
227	LI.M23_RA, WNT, CSF receptors network (monocyte)	0.000219346	0.00187394	-0.840748	-2.1142	0	10	FOS, SPI1, CSF3R, RARA, RXRA, FZD2, CSF1R	C7vsC0	Non-protected
228	LI.M25_TLR8-BAFF network	0.00109673	0.0049612	-0.780487	-1.96266	4	10	IL1R2, TLR8, BCL6, ASGR2, TNFSF13B, PCTP, TBXAS1, SLC40A1, ASGR1	C7vsC0	Non-protected
229	LI.M30_cell movement, Adhesion & Platelet activation	0.00229832	0.00822412	-0.61077	-1.83543	9	19	SELP, GP6, PDGFA, MPP1, CALD1, ITGB3, ALOX12, TNS1, PROS1	C7vsC0	Non-protected
230	LI.M31_cell cycle and growth arrest	0.000219346	0.00187394	-0.846244	-2.12802	0	10	THBS1, DUSP1, PPP1R15A, IL1B, OSM, RARA, JUNB, GADD45B	C7vsC0	Non-protected
231	LI.M32.0_platelet activation (I)	0.00023753	0.00187394	-0.775445	-2.44299	0	23	POR, ZYX, GNB2, TLN1, NUCB1, TGFB1, GNAI2, ACTN4, NR1H2, CORO1A, PFN1, UBE2M, PPP1CA, ACAP1, NRBP1, HGS, FLNA, PPP2R1A, AKT1	C7vsC0	Non-protected
232	LI.M32.1_platelet activation (II)	0.000232721	0.00187394	-0.803001	-2.47683	0	21	ZYX, GNB2, TLN1, MLF2, NBEAL2, TGFB1, GNAI2, ACTN4, AP2M1, SIPA1, DNM2, PFN1, MAP2K2, ACAP1, MAP7D1, PNPLA6, HGS, FLNA, PKN1, AKT1	C7vsC0	Non-protected
233	LI.M32.3_KLF12 targets network	0.000227635	0.00187394	-0.778112	-2.26687	0	17	POR, RHOG, GNB2, NBEAL2, GNAI2, NR1H2, CORO1A, UBE2M, CNOT3, ACAP1, CLPTM1, NRBP1, HGS, PPP2R1A	C7vsC0	Non-protected
234	LI.M32.8_cytoskeletal remodeling	0.00219346	0.00794462	-0.746234	-1.87653	9	10	ZYX, TLN1, TGFB1, AP2M1, ATP2A3, MAP7D1, FLNA, AKT1	C7vsC0	Non-protected
235	LI.M33_inflammatory response	0.00132655	0.00549512	-0.727386	-1.87837	5	11	APOBR, TLR4, ARRB2, FCER1G, AIF1, TYROBP, TNFSF13, TBC1D8, STAB1, GPX1, CARD9	C7vsC0	Non-protected
236	LI.M37.0_immune activation - generic cluster	0.000405844	0.00231799	-0.548457	-2.77047	0	308	CD177, MMP9, LRG1, DYSF, HP, ANXA3, PRTN3, SLC26A8, IL1R2, BASP1, G0S2, CR1, CEACAM1, PKMYT1, PROK2, F5, PADI2, FPR2, CRISPLD2, ACSL1, KCNJ15, GPR97, NFE2, CDA, AQP9, CXCR2, MGAM, PYGL, ROPN1L, ANPEP, MARC1, QPCT, TLR5, DOK3, FCAR, NRGN, TREM1, NCF4, PFKFB4, TNFAIP6, RNF150, GPR84, RBP7, ITGAM, SLC22A4, STX11, SLC27A2, S100P, FOLR3, MANSC1, SIGLEC5, STEAP4, CHI3L1, ORM1, LRP1, CMTM2, AMICA1, RASG…	C7vsC0	Non-protected
237	LI.M37.1_enriched in neutrophils (I)	0.000259336	0.00187394	-0.879974	-3.34769	0	51	LRG1, ALPL, BASP1, G0S2, PROK2, DGAT2, FPR2, KCNJ15, GPR97, CXCR1, FPR1, NFE2, MME, CDA, MGAM, PYGL, KRT23, TREM1, NCF4, PFKFB4, SLC22A4, S100P, MANSC1, MSRB1, STEAP4, CHI3L1, ORM1, FFAR2, RNF24, PTAFR, FCGR2A, CMTM2, CSF3R, FCGR3B, TNFRSF10C, HCAR3, NLRP12, VNN2, C5AR1, LRRC4, MXD1, ST6GALNAC2, VNN3, GLT1D1, CYP4F3, REPS2	C7vsC0	Non-protected
238	LI.M40_complement and other receptors in DCs	0.000448129	0.00240852	-0.747286	-2.02748	1	13	C1QC, SIRPA, LY96, TLR8, ITGAX, TYROBP, C1QA	C7vsC0	Non-protected
239	LI.M42_platelet activation (III)	0.00174825	0.00649038	-0.776344	-1.89256	7	9	FCER1G, LYN, PLCG2, VAV1, GNA15, SYK, LCP2, GNAQ	C7vsC0	Non-protected
240	LI.M47.0_enriched in B cells (I)	0.00114886	0.00496874	0.506478	1.73932	6	44	PCDH9, FCRL1, STAP1, E2F5, AFF3, KLHL14, BTLA, MS4A1, TCF4, FCRL2, FCRL5, CXCR5, TSPAN13, PPAPDC1B, PAX5, FAM129C, EBF1, ABCB4, CR2, PLEKHG1, BANK1, HLA-DOB, TCL1A, RALGPS2, P2RX5, CD200, KIAA0125, ADAM28, CD19, BCL11A, CD79B, PKIG, MACROD2	C7vsC0	Non-protected
241	LI.M49_transcription regulation in cell development	0.000257003	0.00187394	-0.520367	-1.92576	0	45	BASP1, SOD2, SEMA4A, GSN, TIMP2, LYN, LST1, VCAN, GATA1, FES, RXRA, TYROBP, PAK1, KIF4A, ANK1, TAL1, ECT2, CCNB1, PLXNB2, BRCA1, HMGB2, ARHGEF12, KLF1, TMOD1, EPB42, SPTB, SPTA1	C7vsC0	Non-protected
242	LI.M51_cell adhesion	0.000477783	0.00244658	-0.610943	-1.94852	1	24	THBS1, ITGA2B, SELP, IL1B, VWF, ITGB3, GP9, MMRN1, ITGB5, ALOX12, GP1BA	C7vsC0	Non-protected
243	LI.M56_suppression of MAPK signaling	0.000222025	0.00187394	-0.861219	-2.27651	0	12	IL1R2, DUSP1, FOS, IL1B, CD14, RASGRP4, HSPA6, ARRB2, DUSP3	C7vsC0	Non-protected
244	LI.M59_CCR1, 7 and cell signaling	0.00174825	0.00649038	-0.784482	-1.9124	7	9	TRIB1, MAPK14, TIMP2, CCR1, BCL6	C7vsC0	Non-protected
245	LI.M63_regulation of localization (GO)	0.000222025	0.00187394	-0.771466	-2.03926	0	12	STXBP2, TGFB1, NAPA, ARAP1, NR1H2, ARHGDIA, TSC2, MAP2K2, FLNA, PKN1, AKT1, SNX17	C7vsC0	Non-protected
246	LI.M64_enriched in activated dendritic cells/monocytes	0.000226603	0.00187394	-0.81189	-2.29847	0	15	BASP1, G0S2, FAM129A, IL1RN, IL1B, ANPEP, SOD2, SLC15A3, SIRPA, IL13RA1, SLC31A2, CXCL1	C7vsC0	Non-protected
247	LI.M67_activated dendritic cells	0.00154765	0.00609618	-0.721448	-1.86304	6	11	SERPING1, C1QC, PLSCR1, C2, IRF7	C7vsC0	Non-protected
248	LI.M73_enriched in monocytes (III)	0.000222025	0.00187394	-0.770591	-2.03695	0	12	FOS, CEBPB, HCAR3, MAML3, TIMP2, CCR1, PLXDC2, BCL6	C7vsC0	Non-protected
249	LI.M75_antiviral IFN signature	0.000234907	0.00187394	-0.661366	-2.06183	0	22	SERPING1, ANXA3, BCL3, CXCL10, IL1B, RARA, IRF7	C7vsC0	Non-protected
250	LI.M81_enriched in myeloid cells and monocytes	0.000246975	0.00187394	-0.743595	-2.5477	0	32	THBS1, ITGA2B, F5, SELP, CD14, PDGFA, CLU, CHI3L1, PCSK6, ACTN1, ITGB3, TLR4, PTGS1, FCER1G, SPARC, MMRN1, BCL6, PRAM1, EGF, CSF1R, PROS1, NLRP3, EHD3, SLC8A1, CCR2, LIN7A, CLEC5A	C7vsC0	Non-protected
251	LI.M85_platelet activation and degranulation	0.000437063	0.00240385	-0.836327	-2.03879	1	9	THBS1, SERPINA1, CLU, VWF, TIMP1, SPARC, SERPINE1	C7vsC0	Non-protected
252	LI.M86.0_chemokines and inflammatory molecules in myeloid cells	0.00136581	0.00555679	-0.647595	-1.88664	5	17	G0S2, DUSP1, BCL2A1, IL1B, TNFAIP6, NFKBIA, CXCL1, NFKB1	C7vsC0	Non-protected
253	LI.M87_transmembrane transport (I)	0.000234907	0.00187394	-0.664166	-2.07055	0	22	AQP9, SLC22A4, SLC11A1, SLC15A3, TLR4, HK3, TLR2, HMOX1, VDR, SLC31A2, ABCG2, ABCB6, NLRP3	C7vsC0	Non-protected
254	LI.M94_growth factor induced, enriched in nuclear receptor subfamily 4	0.00174825	0.00649038	-0.777621	-1.89567	7	9	DUSP1, PPP1R15A, CDKN1A, NR4A3, EGR3	C7vsC0	Non-protected
255	LI.M95.1_enriched in antigen presentation (III)	0.00158049	0.00609618	-0.702906	-1.94613	6	14	ICAM1, AIF1, ITGB2, CD53, LAPTM5, HLA-DRB5, HLA-DRB1, EVI2B, PLEK	C7vsC0	Non-protected
256	LI.M100_MAPK, RAS signaling	0.00109673	0.0049612	-0.77335	-1.94472	4	10	RASGRP4, ARRB2, TGFB1, RAC2, MAP3K11, MAP2K2, FLNA, AKT1	C7vsC0	Non-protected
257	LI.M111.0_viral sensing & immunity; IRF2 targets network (I)	0.000227635	0.00187394	-0.721332	-2.10145	0	17	THBS1, EREG, CXCL16, IFI35, FES, AIF1, TAP1, TNFSF13B, PSMB8, BST2	C7vsC0	Non-protected
258	LI.M111.1_viral sensing & immunity; IRF2 targets network (II)	0.00132655	0.00549512	-0.724714	-1.87147	5	11	CXCL10, TAP1, TNFSF13B, IFIT2, CASP1, PSMB8, BST2, PSMB10	C7vsC0	Non-protected
259	LI.M112.0_complement activation (I)	0.00156845	0.00609618	-0.694113	-1.88321	6	13	SERPING1, CR1, C1QC, C2, C3, C5AR1, C1QA, CFD, A2M, C3AR1, C1QB	C7vsC0	Non-protected
260	LI.M118.0_enriched in monocytes (IV)	0.000263713	0.00187394	-0.695981	-2.70703	0	56	DYSF, IL1R2, PADI4, F5, ACSL1, CXCR2, MGAM, MARC1, DOK3, MPP1, PGD, STEAP4, AMICA1, MYO1F, EMILIN2, HCAR3, AGPAT9, LY96, VNN1, HAL, BCL6, LTBR, TNFSF13B, PAK1, TLR1, TMEM176B, EMR1, CD68, SMARCD3, TNFRSF1B, LRRK2, NAIP	C7vsC0	Non-protected
261	LI.M118.1_enriched in monocytes (surface)	0.000227066	0.00187394	-0.773757	-2.21901	0	16	IL1R2, STEAP4, SLC16A3, NFAM1, AGPAT9, LTBR, TNFSF13B, TMEM176B, EMR1, MCTP1, TNFRSF1B	C7vsC0	Non-protected
262	LI.M124_enriched in membrane proteins	0.000227635	0.00187394	-0.69955	-2.038	0	17	HP, PROK2, C5AR1, LTF, ABCG2, ABCB6, SLC40A1, HLA-DRB1, SLC4A1, C3AR1, ALAS2, TGM2, AQP1, NEDD4L	C7vsC0	Non-protected
263	LI.M127_type I interferon response	0.00133215	0.00549512	-0.710623	-1.87843	5	12	PLSCR1, PARP9, IRF7, TAP1, STAT1, IFITM1	C7vsC0	Non-protected
264	LI.M132_recruitment of neutrophils	0.000221092	0.00187394	-0.866422	-2.23741	0	11	PROK2, FPR2, CXCR1, FPR1, FFAR2, PTAFR, HCAR3, C5AR1, GNG10	C7vsC0	Non-protected
265	LI.M140_extracellular matrix, complement	0.000888099	0.00418675	-0.731707	-1.93417	3	12	MMP9, PRTN3, CRISPLD2, TIMP2, CFP, LTBP2, SLPI, FCN1, CRISP3, MMP8	C7vsC0	Non-protected
266	LI.M150_innate antiviral response	0.00111012	0.0049612	-0.720807	-1.90535	4	12	PLSCR1, IRF7, TAP1, RXRA, APOBEC3A, OASL, EIF2AK2, OAS1	C7vsC0	Non-protected
267	LI.M163_enriched in neutrophils (II)	0.000224065	0.00187394	-0.796586	-2.16124	0	13	MBOAT7, BTNL8, HSPA6, BEST1, NPL, FRAT2, TYROBP, DENND3, IMPA2, ARAP3, SLC40A1	C7vsC0	Non-protected
268	LI.M165_enriched in activated dendritic cells (II)	0.000241429	0.00187394	-0.654266	-2.19517	0	29	HLX, SERPING1, BCL2A1, TNFAIP6, RBM47, ATF3, PRRG4, PARP9, CSF2RB, MX2, IFIT3, IFNGR2, IFIT2	C7vsC0	Non-protected
269	LI.M196_platelet activation - actin binding	0.000226603	0.00187394	-0.753097	-2.13202	0	15	THBS1, ITGA2B, MPL, ABLIM3, ITGB3, ITGB5, MFAP3L, ASAP2, PROS1, PDE5A, TPM4	C7vsC0	Non-protected
270	LI.M199_platelet activation & blood coagulation	0.000225785	0.00187394	-0.780323	-2.16047	0	14	GP6, SEPT5, PCSK6, VWF, GP1BB, GP9, TTC7B, SH3BGRL2, EGF, GP1BA, PROS1	C7vsC0	Non-protected
271	LI.M209_lysosome	0.000655594	0.00317731	-0.821707	-2.00314	2	9	PSAP, SORT1, GNS, GM2A, CD68, CTSB, CTSL, CTSZ	C7vsC0	Non-protected
272	LI.M215_small GTPase mediated signal transduction	0.000454133	0.00240852	-0.675379	-1.93688	1	16	RHOG, RAC2, ARHGAP9, TAGAP, FGD3, VAV1, ARAP1, ARHGDIA, GMIP, ARHGDIB, ARHGAP30, ARHGAP25	C7vsC0	Non-protected
273	LI.S4_Monocyte surface signature	0.00028393	0.00187394	-0.71407	-3.04232	0	91	FCGR1B, DYSF, IL1R2, FPR2, FPR1, MBOAT7, MGAM, TLR5, FCAR, TREM1, ITGAM, LILRB3, STEAP4, LRP1, PTAFR, FCGR2A, AMICA1, SLC11A1, CSF3R, CD163, TLR4, SLC16A3, CECR6, SIRPB1, HCAR3, BRI3, VNN2, C5AR1, C10orf54, LPPR2, NFAM1, TLR2, FCGRT, ANO10, CCR1, LTBR, SIGLEC9, ASGR2, AGTRAP, P2RY13, EMR2, IL6R, LILRB2, TLR1, PYCARD, P2RX1, EMR1, MCTP1, KCNE3, TNFRSF1B, TMEM55A, KCNQ1, SLC40A1, CD93, SLC46A2	C7vsC0	Non-protected
274	LI.S5_DC surface signature	0.000556638	0.00280206	-0.447932	-1.8417	1	76	COLEC12, SLC1A3, TMEM158, FZD5, CXCL16, TGFA, GRINA, SLAMF8, ABCC3, CLDN23, LHFPL2, IL1R1, PRRG4, CCRL2, CSF2RB, TSPAN33, CD274, CD151, LAMP2, RAMP1, TACSTD2	C7vsC0	Non-protected
275	DC.M1.1_Platelets	0.000279799	0.00187394	-0.72191	-2.98147	0	78	SLC8A3, SYTL4, ITGA2B, MPL, SEC14L5, SAMD14, ABLIM3, SELP, GP6, NRGN, MYL9, SEPT5, GNAZ, FSTL1, RBPMS2, TSPAN9, ABCC3, CALD1, VWF, CTTN, PTGS1, CXCL5, NT5M, GP9, SPARC, SLC24A3, MMRN1, CLDN5, ITGB5, CTDSPL, F13A1, TSPAN33, SPOCD1, TREML1, SH3BGRL2, ALOX12, EGF, CMTM5, TMEM40, ASAP2, DNM3, PROS1, MGLL, BEND2, PDLIM1, CABP5, PPBP, MEIS1, PARVB, PDE5A, TFPI, TUBB1, HIST1H2AG, TNFSF4, MTURN	C7vsC0	Non-protected
276	DC.M2.3_Erythrocytes	0.000269324	0.00187394	-0.532853	-2.12694	0	64	CMBL, RNF182, BSG, SLC7A5, FAM46C, PLEK2, TNS1, MARCH8, SLC6A8, ANK1, SLC6A9, NPRL3, GMPR, SLC1A5, IGF2BP2, ARHGEF12, BCL2L1, TMCC2, KLF1, SIAH2, TMOD1, BPGM, OSBP2, EPB42, SLC4A1, NFIX, TSTA3, ALAS2, TGM2, TRIM58, CCDC176, DYRK3, FAM210B, SELENBP1, MICALCL, XK, MICAL2, GPR146, PIP4K2A, BNIP3L, IFIT1B, RBM38, HBD	C7vsC0	Non-protected
277	DC.M3.1_Erythrocytes	0.000275179	0.00187394	-0.646762	-2.6364	0	71	GRINA, R3HDM4, GLUL, MAP2K3, GATA1, FAXDC2, MCOLN1, PBX1, ATP6V0C, PHOSPHO1, ESPN, E2F2, AP2A1, CDC34, TMEM86B, MKRN1, KEL, PSMF1, DMTN, DPM2, ST6GALNAC4, SLC25A39, PLVAP, VWCE, CNPPD1, TMEM63B, PDZK1IP1, ADIPOR1, SLC25A37, ASCC2, TESC, CARM1, STRADB, BCL2L1, GYPC, UBXN6, DCAF12, DCAF6, HPS1, RAB3IL1, GUCD1, RUNDC3A, UBALD1, SPTA1, RNF11, FBXO7, MYL4, TGM2, RNF123, TPGS2, GUK1, HAGH, GSPT1	C7vsC0	Non-protected
278	DC.M3.2_Inflammation	0.00029994	0.00189537	-0.875028	-3.87152	0	115	DYSF, PFKFB3, SLC26A8, ST3GAL4, BASP1, DHRS13, PADI4, PROK2, F5, DGAT2, FPR2, CRISPLD2, ACSL1, KCNJ15, FAM129A, GPR97, CEBPD, PHC2, SLC2A3, DUSP1, IL1RN, TRIB1, MRVI1, MME, CDA, AQP9, CST7, PYGL, ROPN1L, QPCT, FLOT2, FLOT1, SERPINA1, B4GALT5, CD55, SOD2, SEMA4A, CEBPB, ALOX5, S100A11, NCF4, TGFA, MMP25, ITGAM, SLC22A4, PDLIM7, PGD, FOLR3, MANSC1, SIGLEC5, APMAP, MSRB1, STEAP4, SLC37A3, NFIL3, HCK…	C7vsC0	Non-protected
279	DC.M3.4_Interferon	0.000261097	0.00187394	-0.687014	-2.57303	0	48	CARD17, CEACAM1, PLSCR1, TNFAIP6, ATF3, SCO2, WARS, UBE2L6, IFI35, LAP3, HELZ2, PARP9, IDO1, IRF7, STAT1, SEPT4, GBP1, SOCS1, IFIT2, APOL6, PML, TNFSF10, FBXO6, IFITM1, STAT2, AIM2, GBP5, EIF2AK2	C7vsC0	Non-protected
280	DC.M3.5_Cell Cycle	0.000144865	0.00187394	0.420571	1.77331	0	145	ZNF621, RPP40, TFB2M, MRPL50, ZC3H8, PUS7, EEF1E1, MTERFD1, COG6, RRP15, WDR4, RABGGTB, TIMM21, EXOSC6, TGDS, ZMYND19, TTC37, WDR12, ORC5, MRPL32, MRPS30, ZNF664, MANEA, ENOPH1, MRPL46, CRYZ, KIAA0020, LTV1, MTX2, NIF3L1, TFAM, BRIX1, ITFG2, SAAL1, EXOSC9, EBAG9, GNL3, GEMIN6, HEATR2, PWP1, POLR2H, NFX1, SNRPA1, UBE2G2, MRPL1, ASCC3, ECI2, LSM7, EXOSC8, WDR92, DUSP12, GNL2, ICT1, ACTL6A, MRPL3, T…	C7vsC0	Non-protected
281	DC.M3.6_Cytotoxic/NK Cell	0.000656491	0.00317731	0.515032	1.7687	3	44	IFNG, SYTL2, CD160, FASLG, ZNF683, KLRK1, SAMD3, KLRF1, FCRL6, PYHIN1, GZMA, MCOLN2, ABCB1, EOMES, PPP2R2B, CD8A, AUTS2, PRSS23, IL2RB, SBK1, PLEKHF1, TGFBR3	C7vsC0	Non-protected
282	DC.M4.1_T cell	0.000161551	0.00187394	0.676987	2.42552	0	54	SLC16A10, KLHL3, TBC1D4, HPCAL4, TXK, TRAT1, AXIN2, ICOS, ADTRP, CD28, OXNAD1, FAM134B, SH3YL1, EPHA4, ARMCX2, HOOK1, BACH2, PASK, TCEA3, FAM84B, IL7R, ATP8B2, LRRN3, TNFRSF25, BCL2, NELL2, BCL11B, EDAR, DOCK9, TESPA1, CCDC64, TCF7, MAN1C1, ID3, LEF1, TMEM204, EPHX2, FAIM3, ABLIM1, GAL3ST4, SELM, GPR183, CD40LG	C7vsC0	Non-protected
283	DC.M4.2_Inflammation	0.000256674	0.00187394	-0.875361	-3.12637	0	39	MMP9, LRG1, ALPL, SOCS3, SLC2A14, ANXA3, KREMEN1, IL1R2, SIPA1L2, CR1, CYSTM1, CASP5, PGLYRP1, MGAM, LMNB1, S100A12, WDFY3, TLR5, SERPINA1, PLIN4, FCAR, LIMK2, S100P, OSM, MAPK14, OPLAH, NSUN7, VNN2, MCTP2, GPR141, VNN1, IL18R1, FKBP5, SLPI	C7vsC0	Non-protected
284	DC.M4.3_Protein Synthesis	0.00115435	0.00496874	0.5341	1.78375	6	38	HSF2, RPL9, ZNF22, EPB41L4A-AS1, ZFAND1, RPL17, TMEM42, ZNF32, MPHOSPH10, EEF1B2, LRRC75A-AS1, BOD1, ELP2, RPS18, RPL5, SNRPD2, DDX18, MCCC1, RPS3, RPS14, RPS5, RPS20, RPS13, RPS27A, RPL26, PEBP1, RPL36, RPL7A, RPL12, RPL4, RPL6	C7vsC0	Non-protected
285	DC.M4.6_Inflammation	0.000292997	0.00189174	-0.750417	-3.29743	0	109	CSRNP1, ALOX5AP, CD97, LITAF, IFITM2, ZYX, SBNO2, APBB1IP, RALB, MVP, GRN, CHSY1, MSRB2, FCGR2A, ATP6V0D1, STAT3, CHMP2A, SQRDL, LSP1, IL10RB, BRI3, YIPF1, SLC25A44, PHF21A, GLIPR2, ITPRIP, MIDN, IFNAR1, CASP4, LYN, CDK14, CYTH4, MAPK3, SELL, MLKL, CYBA, THOC5, DDAH2, CTNNA1, STAT5B, FTH1, PRKCD, ATF6, RAB24, P2RY13, AKIRIN2, LAT2, LAMP2, ZFP36, SLCO3A1, MEFV, TCIRG1, S100A6, IFNGR2, NCSTN, SNX11…	C7vsC0	Non-protected
286	DC.M4.7_Cell Cycle	0.000153988	0.00187394	0.620974	2.45087	0	95	CEP290, CYP4V2, ZNF529, PEX3, CLEC2D, SLC25A36, TRAF5, ZNF84, SLC7A6, TYW3, SLC39A10, ATM, MTR, ANKRD46, C12orf29, NOC3L, SLC38A1, LANCL1, BMI1, MTAP, PURA, IFT74, SMAD5, ZMYND11, SMARCAD1, ZNF337, POGLUT1, XPO4, CBLB, ABCE1, ZNF721, AKAP11, ZZZ3, MPRIP, KMT2A, LPIN1, CASD1, SUN1, PREPL, FAM35A, COQ10A, TSPAN3, ZXDB, ASF1A, NPAT, DOCK10, WDR75, TMEM116, TTC3, WWP1, SLAIN1, WDR36, NKRF, ANAPC1, ST…	C7vsC0	Non-protected
287	DC.M4.10_B cell	0.00186599	0.00684196	0.584683	1.84647	10	30	FCRL1, STAP1, COBLL1, E2F5, CNTNAP2, AFF3, MS4A1, FCRL2, FCRL5, CXCR5, BLNK, TSPAN13, FAM129C, EBF1, CCR6, BANK1, HLA-DOB, TCL1A, HLA-DOA	C7vsC0	Non-protected
288	DC.M4.13_Inflammation	0.000278319	0.00187394	-0.789356	-3.2455	0	76	HLX, FAM129A, CXCR1, TLE3, FPR1, FOS, CXCR2, MBOAT7, IL1B, NCF4, PFKFB4, MTHFS, PDLIM7, SPI1, TNFRSF1A, LRP10, ACTN1, TREML2, FRAT1, SMAP2, XPO6, TNFRSF10C, TSEN34, PANX2, SIRPB1, NLRP12, C5AR1, LPPR2, FAM53C, SDCBP, MXD1, ST6GALNAC2, AGPAT9, SLC19A1, SIRPD, VNN3, ZDHHC18, FRAT2, PACSIN2, SKAP2, GAB2, UBTD1, TBC1D14, P2RY13, ACOX1, EMR2, C1RL, LAMP2, SVIL, ASAP1, MTMR3, IL13RA1, CHST15, NUMB, SSH…	C7vsC0	Non-protected
289	DC.M4.15_T cells	0.000163559	0.00187394	0.627789	2.1319	0	41	MTX3, KLF12, TC2N, GRPEL2, DYRK2, RASGRP1, PLEKHA1, SH2D1A, ZNF831, S1PR1, ITM2A, NMT2, THEMIS, ITK, TRMT11, LY9, PLCG1, CD96, PRKCQ, ZAP70, OCIAD2, MORC4, PRKCH, GZMK, SKAP1, CD247, ZNF256, LCK, CD6, ARL4C, LBH, GPR18	C7vsC0	Non-protected
290	DC.M5.1_Inflammation	0.000364299	0.0021215	-0.622832	-3.03534	0	228	TXN, TUBA1A, RHOG, GRN, PTAFR, FOSL2, NDUFB3, CHMP2A, PXN, CNN2, SLC15A3, KIAA0040, NDEL1, ALDOA, IGSF6, CTDP1, ACTB, PRR13, LPCAT3, IRF2BPL, HCLS1, OS9, ARID3A, RABAC1, ZNF787, CFP, NANS, CCR1, NARF, PSENEN, ATP6AP1, GMFG, NRD1, NDRG1, AGPAT2, FERMT3, GNAI2, RAC2, FKBP1A, EHD1, RPS6KA1, MAPKAPK2, ZNF319, OSTF1, GRB2, ATP6V1B2, DTX2, TYROBP, GADD45G, TMEM180, ATP6V0B, ACSS2, ATP6V0E1, RAB7A, C20o…	C7vsC0	Non-protected
291	DC.M5.6_Mitochondrial Stress / Proteasome	0.000146951	0.00187394	0.436031	1.81673	0	136	LSM8, PCGF6, STAMBPL1, SCOC, DTWD1, MAPK6, DYNLT3, DNAJC24, TRNT1, YAE1D1, ATAD1, MRPS28, CCDC91, UPF3B, PDHX, BET1, KANK1, XRCC6BP1, METTL5, SLC25A12, TCF12, PHAX, RBMX, PRKRIR, C1orf131, DNAAF2, DNM1L, LIAS, ZNF791, PSMG1, ACTR6, MRPL19, KIAA1279, DHX36, CCDC109B, KIAA0391, ACAA2, DAAM1, FOPNL, UBE2D4, ZUFSP, RBM26, NFU1, UAP1, PDCD5, SLC39A8, EIF1AX, DCUN1D5, CCNG1, UCHL5, NUCB2, SS18, TRIT1, …	C7vsC0	Non-protected
292	DC.M5.7_Inflammation	0.000311429	0.00192697	-0.629105	-2.84785	0	132	IGF2R, CXCL16, CPD, AMICA1, ICAM3, SPATA2L, EXTL3, CPQ, DHRS12, TBL1X, H3F3B, FCGRT, PLXDC2, ADAM19, IQGAP1, TRIM8, TMCC3, MAP4K4, CNPY3, SLC44A2, ZNF746, ARHGAP9, PRMT5, RNASET2, PIK3CD, EGLN1, S100A4, PGM1, HLA-E, PYCARD, IMPA2, PPT1, ERGIC1, NCOA1, KIAA0247, HSDL2, RAB27A, RNF130, DHRS7, RBPJ, VAV3, HSD17B11, ATP6V1A, TMCO3, FAM49A, TMEM43, PISD, FCGR2B, RAF1, NUP214, HPSE, STAT6, CD93, KDM5B,…	C7vsC0	Non-protected
293	DC.M5.12_Interferon	0.000264131	0.00187394	-0.651077	-2.54165	0	57	ETV7, TMEM140, TYMP, IRF9, NTNG2, LHFPL2, ASPRV1, IFI16, GBP2, TRIM21, TRIM25, ZNFX1, ADAR, TRAFD1, TAP1, ACTA2, GADD45B, DYNLT1, NMI, C1QA, CASP1, SP110, TRANK1, RBCK1, PSMB9, BST2, UNC93B1, RHBDF2, LGALS9, DHRS9, RFWD2, ZC3HAV1, TCN2, HSH2D, CPT1B, TRIM5, ISG20, TAP2, DRAP1, PARP10	C7vsC0	Non-protected
294	DC.M6.6_Apoptosis / Survival	0.000261097	0.00187394	-0.731097	-2.73813	0	48	CD14, SLC43A2, IL4R, OSGIN1, MOB3A, EMILIN2, GALK1, CTSD, SLC9A1, GABARAP, ST3GAL2, EPN1, BCKDK, MAP3K6, GRAMD1A, TSPO, EXT1, UPP1, FCN1, NAPRT1, IFI30, DEDD2, TPD52L2, SIPA1L1, RAB32, DUSP3, FAM129B, CAPG, SMARCD3, TNFRSF1B, CD300C, TNFSF13, TP53I3, TBC1D2, MARCO, FADD	C7vsC0	Non-protected
295	DC.M6.12_Mitochondrial Stress	0.000473186	0.00244658	0.493023	1.84494	2	69	MPHOSPH9, ZNF260, ITGB3BP, RWDD2A, GEMIN2, FAM3C, NOP58, HLTF, NDUFAF4, PDIK1L, POLR3E, ZDHHC23, N6AMT2, ZNF696, NARS2, AARSD1, GLMN, NUBPL, ZNF544, MAGEH1, TRIM32, BOLA3, PXMP2, NFE2L3, UQCC2, CTPS1, GLS, NUDCD2, SEH1L, GTF2H4	C7vsC0	Non-protected
296	DC.M6.13_Cell Death	0.00025582	0.00187394	-0.775232	-2.85178	0	44	BCL3, RAB20, STX11, LILRB3, GNB2, RASGRP4, VASP, HSPA6, UBN1, NCF1, PLIN3, FNDC3B, CSTA, HK3, FCER1G, STK3, LILRA2, VPS9D1, FES, HIST1H2BC, EIF4E3, SERPINB1, PILRA, SIGLEC9, NFKBIA, LAMP2, MNDA, CARD6, LRRC25, MCTP1, PLAUR, NLRP3, CPEB4, NTSR1, TBC1D8, NLRC4	C7vsC0	Non-protected
297	DC.M7.1_Inflammation	0.000330797	0.00198198	-0.679288	-3.20218	0	172	SH2B2, PPP1R15A, MSRA, CTSA, WAS, IMPDH1, TSC22D3, RARA, RTN2, MYH9, TLN1, TALDO1, APOBR, GSN, TMEM119, HRH2, SEMA4B, MYADM, LSP1, RAB3D, BCORL1, G6PD, SH3PXD2B, C17orf62, TIMP1, MLF2, TIMP2, PLEKHO2, GPSM3, UBA1, PKM, KDM4B, RAB1B, SHISA5, CDKN2D, PLD1, LRPAP1, NCF2, CAPN1, LTBR, PREX1, MSN, S1PR4, ULK1, PPP4C, RIN3, CUX1, GAPDH, CAPZB, NCKAP5L, TNIP1, MAP1S, SIRPB2, ARHGAP26, PLEKHM1, GBGT1, SH…	C7vsC0	Non-protected
298	LI.M1.0_integrin cell surface interactions (I)	0.000182648	0.0035759	0.822823	2.09326	0	18	ITGB3, ITGA2B, CAV2, FN1, LAMC1, MYL9, ITGA9, COL6A3, LAMB2, PDGFRB	C0vsB0	Mock
299	LI.M4.0_cell cycle and transcription	0.000140746	0.0035759	0.519256	2.11863	0	320	DSCC1, GINS1, ANLN, CENPI, ASPM, TRIP13, CDC20, BIRC5, KIF4A, GGH, RRM2, KIF15, EXO1, MKI67, KIF14, MYOF, CEP55, E2F8, MYBL2, CENPF, TK1, NUF2, TTK, TOP2A, DLGAP5, HMMR, ORC1, CD163, DTL, NCAPH, CCNB1, MCM10, ESPL1, CDC6, CENPW, VCAN, CDCA5, FAM83D, KIAA0101, UBE2C, HJURP, CHAC2, BUB1, CCNB2, STIL, KIAA1598, CSF1R, AURKA, TPX2, CASC5, RTN1, EMR2, WDHD1, EPB41L3, CENPM, FAM72A, SORT1, CEACAM8, CD9…	C0vsB0	Mock
300	LI.M4.1_cell cycle (I)	0.000155448	0.0035759	0.557698	2.06808	0	139	DSCC1, GINS1, ANLN, CENPI, ASPM, TRIP13, CDC20, BIRC5, RRM2, KIF15, EXO1, MKI67, CEP55, E2F8, MYBL2, CENPF, NUF2, TTK, TOP2A, DLGAP5, DTL, NCAPH, CCNB1, MCM10, ESPL1, CDC6, CENPW, PRKAR2B, CDCA5, FAM83D, UBE2C, HJURP, BUB1, CCNB2, AURKA, TPX2, CASC5, CENPM, BUB1B, MELK, BRIP1, NEK2, E2F2, NUSAP1, CKS2, SUV39H2, KIF2C, CENPN, TUBG1, CDC45, NCAPG2, ZWINT, GMNN, CCNF, CENPE, MCM4, MCM2, KIF18A, FEN1	C0vsB0	Mock
301	LI.M4.2_PLK1 signaling events	0.00070609	0.0065534	0.665837	1.91762	3	32	ASPM, TRIP13, CDC20, KIF14, CEP55, MYBL2, ESPL1, HJURP, BUB1, SGOL1, AURKA, TPX2, BUB1B, WEE1, NUSAP1, CKAP2L, TUBG1, CENPE, KIF23, PLK1, ECT2	C0vsB0	Mock
302	LI.M11.0_enriched in monocytes (II)	0.000150898	0.0035759	0.447562	1.72145	0	184	MYOF, CD163, LRP1, NRGN, F13A1, MS4A4A, KIAA1598, CSF1R, GAS2L1, RTN1, EMR2, CRISPLD2, EPB41L3, SORT1, APOBR, CD93, TNS3, CACNA2D3, TLR8, PLXNB2, HPSE, PDGFC, AOAH, GRN, CYBB, LILRB1, ITGAM, MPEG1, SIRPB1, CLEC4E, IL13RA1, LILRA1, SULF2, FGL2, ANPEP, SLC31A2, PLXDC2, RIN2, DMXL2, SERPINA1, CPPED1, SYK, LILRB3, PTAFR, BTK, NLRP3, TLR2, SIGLEC7, RBM47, PLAUR, ASGR2, FPR2, IRAK3, CD302, TIMP2, LILRA…	C0vsB0	Mock
303	LI.M27.0_chemokine cluster (I)	0.000376223	0.00521437	0.87901	1.89857	1	9	CXCL5, CCL2, CXCL9, PF4, PPBP, CXCL10, XCL1, IFNG	C0vsB0	Mock
304	LI.M30_cell movement, Adhesion & Platelet activation	0.000547046	0.00571293	0.782542	2.01169	2	19	KIF26A, ITGB3, PDGFA, GP6, SELP, CALD1, TNS1, ESAM, ALOX12, PROS1, TPM1, CD9, NAV1	C0vsB0	Mock
305	LI.M37.0_immune activation - generic cluster	0.000142187	0.0035759	0.448935	1.82425	0	308	TSHR, MS4A3, CEACAM6, SLC27A2, IQGAP3, TCN1, ABCA13, OLR1, DEFA4, CD177, PSD3, PRTN3, ZNF608, LTF, MACROD2, ELANE, STK32B, ESCO2, LRP1, INHBA, GNAI1, AZU1, NRGN, LCN2, PRKAR2B, F13A1, TACSTD2, SCD, PRTFDC1, MS4A4A, F5, CR1, FAM46A, GAS2L1, C3AR1, CRISPLD2, EMILIN2, MMP8, MGAM, APOBR, JUP, SIGLEC5, BPI, CACNA2D3, SLC8A1, KLF5, CD9, PAX5, ST3GAL6, PCBP3, MLLT4, NAV1, SVIL, GALNT6, RGL1, PTGS2, C10o…	C0vsB0	Mock
306	LI.M46_cell division stimulated CD4+ T cells	0.000536577	0.00571293	0.722337	1.99418	2	26	GINS1, SLC27A2, KIF4A, GGH, RRM2, TOP2A, DTL, KIAA0101, SHCBP1, ZNRF1, CDC45, ZWINT, CDK6, DHCR24, CDT1, GNB4, ACTN1, TYMS, CDK1, RAD51, APOBEC3B	C0vsB0	Mock
307	LI.M49_transcription regulation in cell development	0.000171204	0.0035759	0.736142	2.2719	0	45	ACHE, ASPM, TRIP13, CDC20, KIF4A, ARHGEF12, FHL2, ANK1, KLF1, CCNB1, TMOD1, VCAN, EPB42, TAL1, SDC2, CASC5, CDH1, SPTB, PLXNB2, LILRB1, GATA1, GSN, PAK1, SEMA4A	C0vsB0	Mock
308	LI.M75_antiviral IFN signature	0.000539374	0.00571293	0.749209	1.9935	2	22	FCER1A, C1QB, ELANE, SERPING1, CXCL10, RSAD2, IFIT1, OAS3, IFIH1, OAS1, DDX60, HERC5, DDX58	C0vsB0	Mock
309	LI.M81_enriched in myeloid cells and monocytes	0.000176523	0.0035759	0.80725	2.32489	0	32	ITGB3, ITGA2B, MMRN1, PDGFA, SELP, THBS1, CLU, SPARC, PCSK6, EGF, SNCA, EHD3, PTGS1, F5, CSF1R, PROS1, FKBP1B, SLC8A1	C0vsB0	Mock
310	LI.M124_enriched in membrane proteins	0.000551775	0.00571293	0.810027	2.02924	2	17	SLC4A1, ABCG2, ALAS2, SNCA, LTF, ELANE, TGM2, C3AR1, NEDD4L	C0vsB0	Mock
311	LI.M145.1_cytoskeleton/actin (SRF transcription targets)	0.000926441	0.00833797	0.816921	1.88405	4	12	SYNPO2, CAV2, CALD1, MYL9, MYLK, TNS1, SORBS1, VCL, TPM1, ACTA2, MYH11	C0vsB0	Mock
312	LI.M156.1_plasma cells, immunoglobulins	0.000192641	0.0035759	0.914883	1.90628	0	8	TNFRSF17, IGLL5, TXNDC5, DERL3, POU2AF1	C0vsB0	Mock
313	LI.M165_enriched in activated dendritic cells (II)	0.000177904	0.0035759	0.733629	2.07556	0	29	IFI27, SERPING1, LAMP3, RSAD2, PRKAR2B, SIGLEC1, IFIT1, ATF3, IFIT3, DOCK4, IFIH1, ST3GAL6, IFIT2, PRRG4, PDGFC, HERC5, CSF2RB, DAPK1	C0vsB0	Mock
314	LI.M171_heme biosynthesis (I)	0.000557828	0.00571293	0.839162	1.90207	2	11	HEMGN, ALAS2, FECH, TMOD1, PLEK2, E2F2, AHSP, GATA1	C0vsB0	Mock
315	LI.M196_platelet activation - actin binding	0.00055269	0.00571293	0.829908	2.01119	2	15	ITGB3, ABLIM3, ITGB5, ITGA2B, THBS1, MFAP3L, PDE5A, ASAP2, ARHGAP6, PROS1, WASF3, TPM1	C0vsB0	Mock
316	LI.M199_platelet activation & blood coagulation	0.000185322	0.0035759	0.887215	2.11657	0	14	LY6G6F, GP6, VWF, PCSK6, EGF, GP1BB, GP9, SH3BGRL2, PRKAR2B, SEPT5, PROS1, TTC7B	C0vsB0	Mock
317	LI.S4_Monocyte surface signature	0.00064914	0.00642648	0.497397	1.73556	3	91	FCER1A, CD163, LRP1, GPER1, EMR2, MGAM, CD93, MARCO, SLC46A2, PLXND1, CYBRD1, NRROS, LILRB1, ITGAM, TMTC2, SIRPB1, ABCA1, CD4, LILRB3, PTAFR, GPR133, MCTP1, TLR2, MBOAT7, DYSF, TMEM154, ASGR2, FPR2, CD302, CCR2, SLC7A7, TNFRSF1B, IL1R2, FXYD6, PTGIR, SPNS1, LILRB2, P2RY2, IL6R, C10orf54, CD33, SIGLEC9, C1orf162, KCNE3, CD36, NFAM1	C0vsB0	Mock
318	LI.S5_DC surface signature	0.000164312	0.0035759	0.601839	2.03527	0	76	ATP1B2, NRP2, OLR1, FPR3, CD1E, TMEM158, RAMP1, ABCC3, TACSTD2, SLC1A3, SIGLEC1, PPAP2B, SLC41A2, SLAMF8, SDC2, TNFRSF11A, CRIM1, ADAM12, TSPAN33, NRP1, PSEN2, CD9, LHFPL2, GPR137B, PRRG4, SLC7A8, CCRL2, ACE, CSF2RB, TMEM255A, ITPRIPL2	C0vsB0	Mock
319	LI.S10_Resting dendritic cell surface signature	0.00033428	0.00521437	0.556728	1.84833	1	69	FCER1A, CD1E, ABCC3, TACSTD2, SLC1A3, CSF1R, SLAMF8, CRIM1, ADAM12, NRP1, PSEN2, CD9, LHFPL2, GPR137B, FZD1, PLXND1, SLC27A3, SLC7A8, TMEM144, CCRL2, ACE, TMEM255A, PLXDC2, PLD3, ITPRIPL2, CD1C, ENG, PTGFRN, CD151, SRD5A3, TMEM51, MCUR1, CD86, ADAM9, LPCAT2, IL1R2	C0vsB0	Mock
320	LI.S11_Activated (LPS) dendritic cell surface signature	0.000351989	0.00521437	0.654177	1.91591	1	35	ITGB8, ELOVL7, NRP2, SLCO5A1, IFI27, SIGLEC1, SLC41A2, ANTXR2, TMCC3, TMEM140, PRRG4, IL13RA1, CSF2RB, SLC43A2, LY75, SLC31A2, RNF144B, EREG	C0vsB0	Mock
321	DC.M1.1_Platelets	0.000164258	0.0035759	0.883954	3.00116	0	78	CXCL5, SEC14L5, RBPMS2, ABLIM3, ITGB5, ITGA2B, MMRN1, SYTL4, BEND2, SPOCD1, CTTN, SLC8A3, LY6G6F, GP6, SAMD14, VWF, SELP, TSPAN9, SPARC, TUBB1, CTDSPL, EGF, CALD1, SDPR, GNAZ, HIST1H2AG, MYL9, GUCY1A3, PDE5A, ASAP2, MYLK, DAB2, NT5M, CABP5, TREML1, GP9, SLC24A3, ABCC3, MMD, DNM3, PPBP, TMEM40, NRGN, SH3BGRL2, CLDN5, PTGS1, BMP6, F13A1, MGLL, PDLIM1, SEPT5, TSC22D1, ACRBP, ALOX12, CMTM5, FHL1, PF4…	C0vsB0	Mock
322	DC.M1.2_Interferon	0.000179565	0.0035759	0.755442	2.0493	0	24	SERPING1, LAMP3, CXCL10, RSAD2, MX1, IFIT1, IFIT3, OAS3, OASL, IFI44L, OAS2, OTOF, ISG15, EPSTI1, OAS1, HERC5, HES4, IFI44, IFITM3	C0vsB0	Mock
323	DC.M2.3_Erythrocytes	0.000168691	0.0035759	0.805715	2.64127	0	64	RNF182, FAM46C, CA1, SLC6A9, SLC4A1, ALAS2, XK, BPGM, TRIM58, TRIM10, KRT1, MICALCL, SNCA, TNS1, GMPR, CTNNAL1, FECH, SELENBP1, ARHGEF12, KANK2, TGM2, SLC6A8, ANK1, KLF1, HBD, TMOD1, MICAL2, SLC7A5, BCL2L1, IFIT1B, SLC1A5, IGF2BP2, EPB42, TMCC2, SLC14A1, FAM210B, PLEK2, SIAH2, MARCH8, OSBP2, RBM38, NFIX, MXI1, CHPT1, CISD2, BSG	C0vsB0	Mock
324	DC.M3.1_Erythrocytes	0.000167029	0.0035759	0.705333	2.35014	0	71	FAXDC2, KEL, TGM2, STRADB, RAB3IL1, DCAF12, BCL2L1, PLVAP, PBX1, MYL4, GSPT1, TMEM86B, MBNL3, ADIPOR1, TSPAN5, ST6GALNAC4, MXI1, MKRN1, CARM1, UBE2O, PHOSPHO1, E2F2, TESC, DMTN, ASCC2, SLC25A39, PSMF1, ESPN, VWCE, GATA1, RNF123, FBXO7, AP2A1, ATP6V0C, RANBP10, CDC34, MCOLN1, LGALS3, DCAF6, HAGH, GRINA, FLCN, RNF11, RUNDC3A, DPM2, TPGS2, CNPPD1, MAP2K3, PRDX2, HPS1, HMBS, R3HDM4, GLUL, TMEM63B	C0vsB0	Mock
325	DC.M3.3_Cell Cycle	0.000170242	0.0035759	0.71648	2.23695	0	48	ANLN, ASPM, TRIP13, CDC20, GGH, RRM2, CEP55, SLC2A5, TK1, TTK, TOP2A, DLGAP5, HMMR, ORC1, ELL2, DTL, CDCA5, KIAA0101, UBE2C, BUB1, CCNB2, STIL, AURKA, TPX2, CENPM, MELK, NUSAP1, CKS2	C0vsB0	Mock
326	DC.M4.1_T cell	0.000241546	0.00421995	-0.597177	-2.04597	0	54	SLC16A10, TCEA3, GAL3ST4, EPHX2, LRRN3, CD248, MAL, HPCAL4, TRAT1, CCR7, PASK, SH3YL1, OXNAD1, SELM, TNFRSF25, ZNF329, LTBP3, STMN3, TMEM204, CCDC64, DHRS3, ADTRP, FAM134B, KLHL3, HOOK1, EDAR	C0vsB0	Mock
327	DC.M4.3_Protein Synthesis	0.000700117	0.0065534	-0.619402	-1.98432	2	38	LRRC75A-AS1, RPL9, ZFAND1, RPS18, RPS14, C19orf70, TMEM42, RPS5, RPS3, EPB41L4A-AS1, RPL36, ZNF32, RPS13, RPS20, RPS27A, RPL4, RPL5, SNRPD2, BOD1, EEF1B2, ZNF22, RPL14, RPL12	C0vsB0	Mock
328	DC.M4.11_Plasma Cells	0.00038625	0.00521437	0.949898	1.77152	1	5	TNFRSF17, IGJ, GLDC, TXNDC5, CD38	C0vsB0	Mock
329	DC.M4.14_Monocytes	0.00033687	0.00521437	0.612213	1.97025	1	57	PDK4, VCAN, KLF11, KIAA1598, CSF1R, ZFHX3, RTN1, DPYSL2, ENC1, TNS3, FZD2, SLC46A2, PLXNB2, CECR1, NRROS, CYBB, LILRB1, MPEG1, RIN2, HMOX1, UBE2E2, NAGA, SLC7A7, ALDH2, CD86, CPNE8, TGFBI, GPBAR1, ABI3, CD33, CPVL, CD36	C0vsB0	Mock
330	DC.M5.9_Protein Synthesis	0.000487924	0.00571293	-0.536131	-1.83924	1	55	RPS29, RPL39, RPS15A, RPL27, RPS10, RPS27, RPS3A, RPS16, FAU, RPL30, RPLP0, NME3, KLHDC2, RPS11, RPL38, RPL8, ATP5S, RPS12, RPL35A, PFDN5, RPS25, MGST3, ANAPC16, RPL31, RPS19, RPL32, RPS28, RPS8, TXNDC12, KIAA1191	C0vsB0	Mock
331	LI.M7.2_enriched in NK cells (I)	0.000179019	0.00513086	0.733915	2.24242	0	45	MYBL1, GZMB, FASLG, GZMH, GNLY, FGFBP2, S1PR5, GPR56, NKG7, CLIC3, PTGDR, SH2D2A, KLRC1, TBX21, PRF1, KLRD1, CTSW, IL2RB, TGFBR3, KLRF1, GZMM, ZAP70, EOMES, HOPX, SAMD3, CST7, KLRK1, RORA, CD247, ARL4C, SLAMF7, PLEKHF1	C1vsC0	Mock
332	LI.M11.0_enriched in monocytes (II)	0.000267094	0.00513086	-0.609494	-2.42926	0	184	S100A8, S100A12, CSTA, CLEC4E, TLR2, S100A9, CRISPLD2, F13A1, ANPEP, RNASE2, CD163, PADI2, AIF1, TLR8, IRAK3, IL13RA1, LRP1, TLR4, APOBR, RBP7, SIRPB1, PYGL, QPCT, FPR1, CACNA2D3, SORT1, MNDA, PTAFR, SIRPA, VNN3, CD302, FCAR, MEGF9, FPR2, AQP9, PLXDC2, CD93, KIAA1598, NRGN, HNMT, FCGR1A, VNN2, BST1, SYK, IGSF6, SGK1, SIGLEC9, ALOX5, LILRB3, MYOF, SULF2, KIAA0513, NCF1, P2RY13, S100A11, BTK, EMR2,…	C1vsC0	Mock
333	LI.M16_TLR and inflammatory signaling	0.000226449	0.00513086	-0.662553	-2.10233	0	45	DYSF, TLR2, WDFY3, MGAM, ANPEP, KCNJ15, PADI4, TLR8, IRAK3, TLR4, APOBR, FPR1, NPL, FCAR, FPR2, AQP9, TLR6, FCGR1A, TLR1, BST1, CXCR2, SIGLEC9, KCNJ2, ALOX5, LILRB3, P2RY13, TLR5, HSPA6, NCF4, C5AR1, LILRA6, TLR7, PILRA, CSF3R	C1vsC0	Mock
334	LI.M27.0_chemokine cluster (I)	0.000426257	0.00703325	-0.89273	-1.95659	1	9	CXCL9, CCL2, IFNG, XCL1, CXCL5, PPBP, CXCL1, PF4	C1vsC0	Mock
335	LI.M27.1_chemokine cluster (II)	0.00063857	0.00948276	-0.865726	-1.84264	2	8	CXCL9, CCL2, XCL1, CXCL5	C1vsC0	Mock
336	LI.M37.0_immune activation - generic cluster	0.000293686	0.00513086	-0.49109	-2.07085	0	308	INHBA, CD177, IQGAP3, TACSTD2, OLR1, DEFA4, F5, S100A8, CEACAM6, STK32B, MMP8, PRTFDC1, LTF, SLC26A8, TCN1, CLC, ST3GAL6, CRISP3, CR1, IL1R2, MMP9, CLEC4D, S100P, ABCA13, CLEC5A, DYSF, MANSC1, SLPI, VSIG10, ESCO2, BPI, LCN2, ANXA3, CRISPLD2, MGAM, F13A1, CMTM2, TNFAIP6, LRRC4, ANPEP, LRRK2, MS4A3, CXCL1, ARG1, ZNF608, RNASE2, PADI2, SIGLEC5, KCNJ15, FGD4, GSN, NME8, ACSL1, SVIL, LPCAT2, LRP1, APO…	C1vsC0	Mock
337	LI.M37.1_enriched in neutrophils (I)	0.000229148	0.00513086	-0.691772	-2.24571	0	51	S100P, MME, MANSC1, MGAM, REPS2, CMTM2, LRRC4, KCNJ15, ALPL, EMR3, PYGL, KRT23, FPR1, CREB5, STEAP4, PTAFR, VNN3, MXD1, FCGR3B, LIN7A, SLC22A4, FPR2, RNF24, VNN2, CYP4F3, DGAT2, CXCR1, PFKFB4, CDA, FFAR2, HCAR3, FCGR2A, PROK2, CHI3L1, TREM1, NLRP12, BASP1, MSRB1, NCF4, C5AR1	C1vsC0	Mock
338	LI.M81_enriched in myeloid cells and monocytes	0.000223564	0.00513086	-0.818745	-2.42012	0	32	PROS1, F5, ITGB3, PDGFA, SELP, MMRN1, ITGA2B, THBS1, CLU, CLEC5A, SPARC, PCSK6, PTGS1, EHD3, EGF, TLR4, ACTN1, SNCA, MYH10, LIN7A, FKBP1B	C1vsC0	Mock
339	LI.M118.0_enriched in monocytes (IV)	0.000228624	0.00513086	-0.593953	-1.97003	0	56	F5, ST3GAL6, IL1R2, DYSF, MGAM, LRRK2, FGD4, PADI4, MPP1, ACSL1, PAK1, STEAP4, ACPP, NAIP, VNN1, MARC1, TLR1, RNASE6, CXCR2, AMICA1, PGD, AGPAT9, DOCK5, HCAR3, EMILIN2, CTSS, HAL, DOK3, MYO1F, TMEM176B, LGALS3, PTGS2, LY96, EMR1	C1vsC0	Mock
340	LI.M199_platelet activation & blood coagulation	0.000215193	0.00513086	-0.813158	-1.98546	0	14	PROS1, SEPT5, VWF, LY6G6F, SH3BGRL2, GP1BB, GP1BA, PCSK6, EGF, GP9, GP5	C1vsC0	Mock
341	LI.S4_Monocyte surface signature	0.000244021	0.00513086	-0.607677	-2.18819	0	91	GPER1, ABCA1, IL1R2, DYSF, TLR2, MGAM, CD163, LRP1, TLR4, SIRPB1, FPR1, STEAP4, PTAFR, S1PR3, CD302, TMEM154, FCAR, FPR2, CD93, MARCO, TLR1, VNN2, SLC40A1, AMICA1, SIGLEC9, CECR6, IL6R, LILRB3, P2RX1, P2RY13, EMR2, TMTC2, MS4A6A, CCR2, HCAR3, MBOAT7, FCGR2A, ITGAM, TLR5, ANO10, C10orf54, CD36, TREM1, NFAM1, CLEC12B, VSTM1, GLIPR1, C5AR1, ASGR2, FCER1A, LPPR2, TMEM71, PTGIR, CSF3R, MCTP1	C1vsC0	Mock
342	DC.M1.1_Platelets	0.000238777	0.00513086	-0.753417	-2.64385	0	78	PROS1, BEND2, SEC14L5, CTDSPL, ABLIM3, SELP, SYTL4, MMRN1, ITGA2B, TFPI, SEPT5, CTTN, CXCL5, PPBP, TUBB1, SPOCD1, VWF, CMTM5, ITGB5, GNG11, CALD1, TREML1, LY6G6F, MEIS1, SPARC, TMEM40, F13A1, CABP5, SH3BGRL2, MYLK, GNAZ, NGFRAP1, MYL9, TSPAN9, GUCY1A3, PTGS1, CLDN5, SLC8A3, DNM3, ACSBG1, PDE5A, EGF, MTURN, TNFSF4, BMP6, FSTL1, DAB2, SDPR, SAMD14, MGLL, GP9, C1orf198, NRGN, TSPAN33, HIST1H2AG	C1vsC0	Mock
343	DC.M3.2_Inflammation	0.000250564	0.00513086	-0.662607	-2.48271	0	115	F5, SLC26A8, GNG10, MME, DYSF, MANSC1, S100A9, CRISPLD2, REPS2, FAM129A, SULT1B1, ABHD2, SIGLEC5, KCNJ15, PADI4, PHC2, TLR8, IL17RA, ACSL1, TLR4, PYGL, NAMPT, QPCT, PLXNC1, CREB5, STEAP4, ROPN1L, SIRPA, MEGF9, LIN7A, SEMA4A, SLC22A4, FPR2, AQP9, TLR6, RNF24, IL1RAP, HMGB2, VNN2, BST1, IL1RN, CYP4F3, CCPG1, CKAP4, DGAT2, STX3, PGD, ALOX5, ZNF438, SRPK1, S100A11, B4GALT5, TGFA, MMP25, SOD2, CDA, SL…	C1vsC0	Mock
344	DC.M3.6_Cytotoxic/NK Cell	0.000178476	0.00513086	0.791536	2.41082	0	44	ZNF683, KLRC3, FASLG, PRSS23, FCRL6, GZMH, GNLY, FGFBP2, AUTS2, GPR56, NKG7, CLIC3, SH2D2A, PRF1, TSEN54, KLRD1, CTSW, IL2RB, TGFBR3, KLRF1, NCALD, KIR3DL2, GZMM, PPP2R2B, SYTL2, EOMES, SAMD3, KLRG1, CD8A, NCR3, KLRK1, GPR114, GPR68, SBK1, PYHIN1, ABCB1, PLEKHF1, CD160	C1vsC0	Mock
345	DC.M4.2_Inflammation	0.000226963	0.00513086	-0.753651	-2.32453	0	39	FKBP5, S100A12, CR1, IL1R2, PGLYRP1, MMP9, CLEC4D, S100P, SLPI, KREMEN1, WDFY3, ANXA3, MGAM, CYSTM1, ALPL, SAMSN1, IRAK3, GPR141, MCTP2, FCAR, VNN1, VNN2, OSM, CASP5, MAPK14	C1vsC0	Mock
346	DC.M4.6_Inflammation	0.000249128	0.00513086	-0.573069	-2.1318	0	109	CKLF, C9orf66, LRRK2, ZCCHC6, FAM65B, CASP4, MSRB2, SELL, DIP2B, FAM160B1, ATG7, MICU1, LAMP2, RALB, SNX27, ITPRIP, PDK3, PCNX, P2RY13, ATF6, NT5C2, ERO1L, APBB1IP, CTNNA1, IFNAR1, LYN, MEFV, ETV6, FCGR2A, IFNGR1, S100A6, SNX11, SLCO3A1, CD97, CHIC2, IFITM2, RNASEL, STAT3, SLC25A44, JDP2, PRKCD, MAPK3, PELO, ZYX, IFNGR2, CFLAR, CHMP2A, HTATIP2, MLKL, ZFP36, STAT5B, GMPR2, STK17B, LSP1, CLIC1, USP…	C1vsC0	Mock
347	DC.M4.11_Plasma Cells	0.000629195	0.00948276	-0.954575	-1.79709	2	5	GLDC, TNFRSF17, IGJ, TXNDC5	C1vsC0	Mock
348	DC.M4.13_Inflammation	0.000237473	0.00513086	-0.673924	-2.36004	0	76	ASAP1, MTHFS, FAM129A, CXCL1, SSH2, SMAP2, RRAGD, SVIL, IL13RA1, SIRPB1, ACTN1, PTEN, FPR1, HLX, CEP19, VNN3, MXD1, MTMR3, CD58, TLR6, FRAT1, ACOX1, CXCR2, LAMP2, SDCBP, PELI1, CXCR1, SLC6A6, AGPAT9, XPO6, P2RY13, DOCK5, LSMEM1, EMR2, PFKFB4, NUMB, SLC19A1, MBOAT7, FAM53C, CHST15, DENND5A, TBC1D14, NLRP12, PDLIM7, FRAT2, NCF4, C5AR1, LPPR2, FOS, CTBS, DENND3, TNFRSF10C, TMEM71, LRP10, C1RL, ZDHHC…	C1vsC0	Mock
349	DC.M5.1_Inflammation	0.000281532	0.00513086	-0.433192	-1.76735	0	228	C1GALT1C1, TXN, KLHL8, NDUFB3, GMFG, SLC12A6, ANTXR2, TMLHE, PARP4, PTAFR, ZNF106, LPGAT1, ARPC3, USP9X, FBXO38, ARHGAP19, HK2, ANKS1A, PGM2, IGSF6, CAB39, ATP6V1B2, DHRS7B, FYB, NOP10, NRD1, LAMTOR3, ZNF281, PRCP, UBE2W, PIK3CB, PTBP3, NIN, CLIP1, TUBA1A, PLA2G4A, UBE2J1, KIDINS220, MS4A6A, CCND3, DSE, OS9, ATP6V1C1, SRGN, PRR13, ATP6V1D, PPP2R3C, GNS, KCTD21, GNA13, FKBP1A, OSTF1, GSK3B, LACTB,…	C1vsC0	Mock
350	DC.M5.7_Inflammation	0.000257069	0.00513086	-0.55926	-2.1332	0	132	IGF2R, IQGAP1, CBL, NCOA1, ADAM19, UBR2, RGS18, CPD, PLXDC2, CD93, FAM49A, TBL1X, NUP214, AMICA1, BICD2, MAP4K4, KDM5B, HSD17B11, EGLN1, DHRS12, KIAA0513, HSDL2, MANBA, HPSE, C7orf25, TMX4, KBTBD7, ZNF746, ATP6V1A, SULT1A1, ZNF217, FNIP1, LONRF1, SPAG9, STXBP3, CORO1C, MAP2K4, TPRG1L, TMCO3, ATXN1, UBE4B, IDS, TMCC3, LMBRD1, CHMP3, CTSS, CLEC4A, TGFBR2, IMPA2, MBP, PPP3CA, MAP3K2, SLC44A2, PPT1, …	C1vsC0	Mock
351	LI.M1.0_integrin cell surface interactions (I)	0.000793808	0.00460515	-0.719154	-1.88994	3	18	FN1, COL6A3, ITGB3, LAMC1, ITGA9, ITGA2B, LAMB2, CAV2, COL5A2, ITGA5	C7vsC0	Mock
352	LI.M1.1_integrin cell surface interactions (II)	0.000604717	0.00367347	-0.938878	-1.78124	2	5	FN1, LAMC1, VWF, LAMB2	C7vsC0	Mock
353	LI.M3_regulation of signal transduction	0.00160707	0.00786726	-0.550612	-1.76022	7	42	BMP2, TLR2, FGD4, KIF26A, FPR1, LYN, GAB1, BCL6, WLS, SULF2, TLR5, PSD3, TIAM2, HPSE, TIMP2, LRP1, C5AR1, SYK, PRKCD, JUP, CDK14	C7vsC0	Mock
354	LI.M4.0_cell cycle and transcription	0.000190114	0.00154913	-0.533274	-2.31525	0	320	DSCC1, HMMR, E2F8, DLGAP5, OIP5, HJURP, EXO1, APOBEC3B, GINS1, UBE2C, NEK2, E2F7, ASPM, CLEC4E, CENPW, TROAP, TTK, AURKA, KIF15, CEACAM8, CENPI, CKAP2L, CENPM, IRAK3, MYBL2, TRIP13, PGLYRP1, TLR2, AURKB, ANLN, CDC6, WDFY3, BIRC5, DTL, BUB1, CENPE, ZWINT, EMR2, CD163, VCAN, TLR4, PADI4, KIF23, FPR1, GCA, SLC31A2, CCNB2, CDC20, IL13RA1, CEBPD, PLK1, SEMA4A, RMI2, SKA1, PTAFR, GGH, TLR8, NUF2, APOBE…	C7vsC0	Mock
355	LI.M4.1_cell cycle (I)	0.000193648	0.00154913	-0.516324	-2.03308	0	139	DSCC1, E2F8, DLGAP5, OIP5, HJURP, EXO1, GINS1, UBE2C, NEK2, E2F7, ASPM, CENPW, TTK, AURKA, KIF15, CENPI, CENPM, MYBL2, TRIP13, AURKB, ANLN, CDC6, BIRC5, DTL, BUB1, CENPE, ZWINT, KIF23, CCNB2, CDC20, PLK1, SKA1, NUF2, BRCA1, KIF18A, BUB1B, CEP55, NCAPG, CENPF, FAM83D, CENPN, RRM2, CDCA8, CDCA5, CDC45	C7vsC0	Mock
356	LI.M4.2_PLK1 signaling events	0.0002002	0.00154913	-0.689115	-2.07431	0	32	SGOL1, HJURP, ASPM, AURKA, CKAP2L, MYBL2, TRIP13, BUB1, CENPE, KIF23, CDC20, PLK1, BUB1B, CEP55, NCAPG	C7vsC0	Mock
357	LI.M4.3_myeloid cell enriched receptors and transporters	0.000199362	0.00154913	-0.710701	-2.10987	0	30	SLC1A3, SLC8A1, TLR8, CHST15, SULF2, TLR5, MYOF, AMICA1, SECTM1, RNASE6, MARCO, LRRC25, CD14, SLC15A3, KCTD12, MPEG1, IGSF6, LILRA1, CCR1, CD1D, SLC7A7, SLC24A4, SIGLEC7	C7vsC0	Mock
358	LI.M7.0_enriched in T cells (I)	0.000202224	0.00154913	0.648226	2.20418	0	54	TRAT1, CD3D, GZMA, CD7, GZMM, SH2D1A, GIMAP7, NKG7, SLA2, IL32, PTPRCAP, GZMH, GNLY, CD3G, FLT3LG, ZAP70, GZMB, SIT1, LCK, SAMD3, TIGIT, CD247, MAL, ITM2A, UBASH3A, KLRB1, LAT, RORA, CD3E, GATA3, GZMK, NLRC3, SIRPG, XCL2	C7vsC0	Mock
359	LI.M7.1_T cell activation (I)	0.00019984	0.00154913	0.643995	2.13192	0	47	CD3D, CD7, KLRK1, CD8B, CD8A, SLA2, CD3G, ZAP70, SIT1, LCK, TIGIT, CD247, RORA, RHOH, CD3E, GATA3, NLRC3, SIRPG, ITPR3, MS4A1, TCF7, RASGRP1, CAMK4, IL12RB1, CD5, CCR7, CD28, PTPN22, DPP4, THEMIS, EOMES, IL21R	C7vsC0	Mock
360	LI.M7.2_enriched in NK cells (I)	0.0004	0.00259298	0.593314	1.94838	1	45	PTGDR, GZMA, GZMM, FGFBP2, KLRK1, GIMAP7, NKG7, FASLG, GZMH, GNLY, MYBL1, STAT4, ZAP70, KLRF1, CTSW, GZMB, SAMD3, CD247, IL2RB, KLRB1, S1PR5, RORA, PLEKHF1, NLRC3, CLIC3, KLRC1, XCL2, HOPX, TGFBR3	C7vsC0	Mock
361	LI.M7.3_T cell activation (II)	0.000200682	0.00154913	0.691476	2.05095	0	28	IFNG, TRAT1, CD3D, GZMA, NKG7, SLA2, PTPRCAP, CD3G, STAT4, ZAP70, LCK, TIGIT, CD247, PTPN7, CD3E, NLRC3, SIRPG	C7vsC0	Mock
362	LI.M11.0_enriched in monocytes (II)	0.000191939	0.00154913	-0.684689	-2.79174	0	184	CRISPLD2, CLEC4E, IRAK3, TLR2, FPR2, AQP9, PYGL, MEGF9, EMR2, PADI2, CD163, TLR4, FPR1, GCA, SLC31A2, ANPEP, QPCT, VNN3, IL13RA1, CEBPD, PTAFR, APOBR, PLXDC2, TLR8, FCAR, LILRA6, CHST15, LYN, SIRPB1, LILRB3, CD93, SLC11A1, FCGR2A, HSPA6, CACNA2D3, RBM47, SULF2, RAB31, S100A11, TLR5, MYOF, NLRP12, SIRPA, VNN2, F13A1, SERPINA1, ALOX5, MNDA, CPPED1, LILRA2, GLT1D1, KIAA0513, BST1, TREM1, ZNF467, HPS…	C7vsC0	Mock
363	LI.M11.1_blood coagulation	0.000198216	0.00154913	-0.769893	-2.10211	0	21	SERPINB2, F5, LYN, SIRPA, F13A1, SERPINA1, AMICA1, TREM1, P2RX1, PLAUR, SYK, SLC16A3, ITGAM, CFD, ITGAX, GNB4, PSAP	C7vsC0	Mock
364	LI.M16_TLR and inflammatory signaling	0.00019992	0.00154913	-0.772854	-2.50886	0	45	KCNJ15, MGAM, DYSF, IRAK3, TLR2, FPR2, AQP9, WDFY3, CXCR2, TLR4, PADI4, FPR1, ANPEP, APOBR, TLR8, FCAR, LILRA6, LILRB3, NPL, HSPA6, KCNJ2, TLR5, ALOX5, NCF4, BST1, P2RY13, TLR1, C5AR1, PILRA, CSF3R, SIGLEC9, TLR6, FES, NFE2, ITGAX, FGR, LILRB2	C7vsC0	Mock
365	LI.M19_T cell differentiation (Th2)	0.00161584	0.00786726	0.723324	1.88583	7	17	TRAT1, IL32, CD3G, SIT1, LCK, PKIA, MAL, ITM2A, UBASH3A, LAT, GATA3, GZMK, CD28, GPR171, DPP4	C7vsC0	Mock
366	LI.M27.1_chemokine cluster (II)	0.000401606	0.00259298	-0.905653	-1.94537	1	8	CCL2, CXCL9, XCL1, CXCL10, CXCL5	C7vsC0	Mock
367	LI.M35.1_signaling in T cells (II)	0.0016	0.00786726	0.787112	1.85141	7	11	IFNG, FOSL1, TNFRSF18, TNFRSF4, FASLG, GZMB, IL2RB	C7vsC0	Mock
368	LI.M37.0_immune activation - generic cluster	0.000190295	0.00154913	-0.602145	-2.60487	0	308	ABCA13, TCN1, CD177, ELANE, PRTN3, MS4A3, SLC26A8, DEFA4, IQGAP3, INHBA, ARG1, ZNF608, MMP9, CEACAM6, IL1R2, TACSTD2, CRISPLD2, PRTFDC1, F5, AZU1, LTF, CR1, KCNJ15, MANSC1, ROPN1L, ESCO2, MGAM, ACSL1, BPI, DYSF, ANXA3, B3GNT5, HP, FPR2, LRRK2, AQP9, FGD4, CXCR2, CREB5, PRRG4, PYGL, MEGF9, PADI2, LRG1, PFKFB4, ORM1, MARC1, GSN, SIGLEC5, SLC22A4, ANPEP, QPCT, GPR97, CLEC5A, SVIL, CLEC4D, BASP1, KLF…	C7vsC0	Mock
369	LI.M37.1_enriched in neutrophils (I)	0.000198373	0.00154913	-0.839178	-2.79288	0	51	REPS2, KCNJ15, MANSC1, MGAM, MME, ALPL, MXD1, KRT23, FPR2, CREB5, PYGL, LRG1, PFKFB4, ORM1, SLC22A4, FPR1, VNN3, GPR97, BASP1, STEAP4, EMR3, CXCR1, LRRC4, FCGR3B, PTAFR, CYP4F3, DGAT2, FFAR2, FCGR2A, RNF24, NLRP12, VNN2, NCF4, CHI3L1, GLT1D1, TREM1, CMTM2, PROK2, MSRB1, C5AR1, CSF3R, S100P, LIN7A, TNFRSF10C, CDA, HCAR3, NFE2	C7vsC0	Mock
370	LI.M47.0_enriched in B cells (I)	0.00100341	0.00562289	0.57817	1.88761	4	44	FCRL1, KIAA0125, STAP1, CD200, PLEKHG1, PKIG, FCER2, TSPAN13, FAM129C, VPREB3, CR2, CD22, CD79B, CD19, TCL1A, CD72, PNOC, BTLA, PTPRK, PAX5, SPIB, TCF4, BCL11A, MS4A1	C7vsC0	Mock
371	LI.M49_transcription regulation in cell development	0.00039984	0.00259298	-0.596882	-1.93761	1	45	ASPM, ACHE, SPTA1, TRIP13, MYH10, SOD2, VCAN, GSN, CDC20, BASP1, SEMA4A, BRCA1, LYN, SDC2, PAK1, TIMP2	C7vsC0	Mock
372	LI.M64_enriched in activated dendritic cells/monocytes	0.00119546	0.00657501	-0.744158	-1.87102	5	15	FAM129A, SOD2, SLC31A2, ANPEP, IL13RA1, BASP1, CXCL1, SIRPA, IL1B, SLC15A3, IL1RN, NINJ1, TNFAIP2	C7vsC0	Mock
373	LI.M73_enriched in monocytes (III)	0.0019996	0.00942669	-0.767974	-1.82414	9	12	PLXDC2, FOS, BCL6, TIMP2, CEBPB, MAML3, HCAR3, RIN2, CCR1	C7vsC0	Mock
374	LI.M75_antiviral IFN signature	0.000197785	0.00154913	-0.732826	-2.0209	0	22	ELANE, CXCL10, ANXA3, FCER1A, SERPING1, RSAD2, IFIT1, C1QB, IL1B, HERC5, OAS3, RARA, BCL3, DDX58	C7vsC0	Mock
375	LI.M81_enriched in myeloid cells and monocytes	0.0002002	0.00154913	-0.786199	-2.36654	0	32	THBS1, F5, EGF, ITGB3, MMRN1, MYH10, SELP, TLR4, ITGA2B, CLEC5A, PROS1, SLC8A1, PTGS1, ACTN1, BCL6, PDGFA, CCR2, SPARC, CHI3L1, CLU, LIN7A, CD14, NLRP3, EHD3, PCSK6	C7vsC0	Mock
376	LI.M113_golgi membrane (I)	0.000198689	0.00154913	-0.85847	-1.9561	0	10	B3GNT5, SGMS2, STEAP4, TLR8, LPCAT2, WLS, SORT1, CSGALNACT1	C7vsC0	Mock
377	LI.M118.0_enriched in monocytes (IV)	0.000198295	0.00154913	-0.691605	-2.34723	0	56	IL1R2, F5, MGAM, ACSL1, DYSF, LRRK2, FGD4, CXCR2, NAIP, MARC1, PADI4, STEAP4, HAL, BCL6, VNN1, DOK3, PAK1, MYO1F, DOCK5, AMICA1, AGPAT9, PGD, ACPP, NACC2, EMILIN2, TLR1, PTGS2, RNASE6, HCAR3, MPP1, DPYD, TMEM176B, CTSS, EVI5, EMR1, LTBR, TNFRSF1B, ST3GAL6, SLC24A4, DUSP6, LY96	C7vsC0	Mock
378	LI.M132_recruitment of neutrophils	0.00019992	0.00154913	-0.866686	-2.01263	0	11	FPR2, FPR1, CXCR1, PTAFR, FFAR2, GNG10, F2RL1, PROK2, C5AR1, CCR3, HCAR3	C7vsC0	Mock
379	LI.M150_innate antiviral response	0.00159968	0.00786726	-0.780421	-1.85371	7	12	RSAD2, APOBEC3A, IFIT1, EIF2AK2, PLSCR1, OASL, OAS3, SP100, TAP1, RXRA, OAS1	C7vsC0	Mock
380	LI.M163_enriched in neutrophils (II)	0.00139637	0.00754039	-0.772573	-1.87545	6	13	MBOAT7, BTNL8, ARAP3, NPL, HSPA6, BEST1, DENND3, FRAT2, SLC40A1, CFD, IMPA2	C7vsC0	Mock
381	LI.M165_enriched in activated dendritic cells (II)	0.00019984	0.00154913	-0.700262	-2.06128	0	29	SERPING1, HLX, PRRG4, RSAD2, TNFAIP6, IFIT2, CSF2RB, IFIT3, RBM47, PARP9, IFIT1, MX2, HERC5, IL18, IFI27, DAPK1, PRKAR2B, IFNGR2, DSE	C7vsC0	Mock
382	LI.M168_enriched in dendritic cells	0.000793808	0.00460515	-0.717889	-1.88662	3	18	TACSTD2, B3GNT5, FCER1A, CLEC5A, IL1R1, RRAGD, AGPAT9, PGD, EMILIN2, ADAM9	C7vsC0	Mock
383	LI.M199_platelet activation & blood coagulation	0.000199005	0.00154913	-0.814792	-2.02025	0	14	EGF, VWF, PROS1, GP1BA, SH3BGRL2, SEPT5, GP1BB, GP6, LY6G6F, PCSK6, PRKAR2B, GP9, TTC7B	C7vsC0	Mock
384	LI.M238_respiratory electron transport chain (mitochondrion)	0.000201979	0.00154913	0.759677	1.98061	0	17	NDUFA4, ATP5J2, ATP5I, NDUFA6, UQCRH, NDUFS4, NDUFC2, NDUFB2, NDUFS8, NDUFS7, UQCRQ, ATP5O, NDUFA3	C7vsC0	Mock
385	LI.S0_T cell surface signature	0.00161193	0.00786726	0.636608	1.85044	7	26	LRRN3, CD320, PTPRCAP, CD3G, FLT3LG, NPDC1, SIT1, MAL, ITM2A, CD3E, SIRPG, CCDC167, CLEC2D, TMEM106C, GIMAP2, CD28, GPR171, CD6	C7vsC0	Mock
386	LI.S4_Monocyte surface signature	0.00019497	0.00154913	-0.698402	-2.57553	0	91	IL1R2, MGAM, DYSF, TLR2, FCER1A, FPR2, CECR6, GPER1, EMR2, CD163, TLR4, FPR1, STEAP4, ABCA1, PTAFR, TMEM154, FCAR, MBOAT7, SIRPB1, LILRB3, CD93, SLC11A1, FCGR2A, C10orf54, CCR2, TLR5, VNN2, AMICA1, IL6R, NFAM1, TREM1, KCNE3, CD302, P2RX1, LPPR2, P2RY13, SLC40A1, LRP1, TLR1, C5AR1, TMEM55A, CSF3R, SIGLEC9, SLC16A3, GPR133, MARCO, ASGR2, ITGAM, HCAR3, S1PR3, LILRB2, CCR1, TMEM71, CLEC12A, GLIPR1, T…	C7vsC0	Mock
387	LI.S5_DC surface signature	0.000390854	0.00259298	-0.520762	-1.86474	1	76	COLEC12, SUCNR1, TACSTD2, SLC1A3, TNFRSF11A, PRRG4, FPR3, LHFPL2, IL1R1, CSF2RB, SLAMF8, CD274, CD9, SDC2, LAMP2, ADAM12, TGFA, SLC6A6, ABCC3, CXCL16, EMP1, RAMP1, ITPRIPL2, SLC41A2, SLC36A1, NRP2, ADAM9, PPAP2B, TMEM158, TSPAN33, CALCRL	C7vsC0	Mock
388	LI.S11_Activated (LPS) dendritic cell surface signature	0.00019972	0.00154913	-0.678564	-2.08958	0	35	COLEC12, SLCO5A1, ELOVL7, TMCC3, PRRG4, ITGB8, RNF144B, SLC31A2, IL13RA1, ANTXR2, CSF2RB, CD274, TMEM140, LAMP2, TGFA, SLC43A2, SLC41A2, NRP2, IFI27, F11R, CALCRL, PDCD1LG2, LY75, GPR157, SIGLEC1, NINJ1	C7vsC0	Mock
389	DC.M1.1_Platelets	0.000194553	0.00154913	-0.671341	-2.41478	0	78	SEC14L5, CALD1, TFPI, FSTL1, GNAZ, ABLIM3, SAMD14, ITGB5, EGF, SLC8A3, CABP5, CTDSPL, CTTN, MMRN1, BMP6, DNM3, SELP, MYLK, BEND2, ITGA2B, CXCL5, VWF, TUBB1, PROS1, MEIS1, PDE5A, HIST1H2AG, PTGS1, SDPR, TSPAN9, ABCC3, SYTL4, SH3BGRL2, SEPT5, F13A1, SPARC, MMD, TMEM40, MGLL, CLDN5, GP6, CMTM5, NT5M, LY6G6F, MTURN, TSPAN33, TNFSF4, GP9, TSC22D1, SLC24A3, DAB2, FHL1, PDLIM1, TREML1	C7vsC0	Mock
390	DC.M3.2_Inflammation	0.000194288	0.00154913	-0.780602	-2.98953	0	115	SLC26A8, EPAS1, CRISPLD2, REPS2, PHC2, F5, KCNJ15, MANSC1, ROPN1L, ACSL1, FAM129A, DYSF, MME, FPR2, AQP9, NAMPT, NFIL3, SOD2, CREB5, PYGL, MRVI1, MEGF9, IL17RA, SULT1B1, IL1RAP, TLR4, B4GALT5, PADI4, SIGLEC5, SLC22A4, GCA, PLXNC1, QPCT, GPR97, BASP1, CEBPD, STEAP4, SEMA4A, MMP25, CYP4F3, TLR8, DGAT2, SLA, ABHD2, KLHL2, BCL6, SLC11A1, FCGR2A, RAB31, TGFA, TRIB1, RNF24, S100A11, RNF149, ZNF438, SIR…	C7vsC0	Mock
391	DC.M3.3_Cell Cycle	0.00039604	0.00259298	-0.622841	-2.05298	1	48	HMMR, DLGAP5, APOBEC3B, SLC2A5, UBE2C, ASPM, TTK, AURKA, CENPM, TRIP13, AURKB, ANLN, DTL, BUB1, ELL2, CCNB2, CDC20, GGH, CEP55, KIAA0101, NCAPG, CENPN, RRM2, CDCA5, TOP2A	C7vsC0	Mock
392	DC.M3.5_Cell Cycle	0.000206697	0.00154913	0.550749	2.2083	0	145	MRPL1, MRPL32, EEF1E1, LSM7, RPP40, MTERFD1, CWC27, ELP4, EBAG9, RABGGTB, ORC5, CRYZ, MRPL9, ITFG2, SNRPF, MRPS12, PIGP, TIMM21, LAGE3, MRPL39, SAAL1, DUSP12, MANEA, LTV1, SNRPA1, POLR2H, CHCHD10, ZNF621, WDR92, MRPL24, ACTL6A, MRPS33, MRPL3, PMVK, KRT10, NME1-NME2, ATP5G1, TRAP1, ZMYND19, EXOSC8, MRPL50, EBNA1BP2, FN3KRP, TOMM5, EXOSC9, AKR1B1, WBSCR22, GRWD1, RRP15, ZC3H8, COG6, MRPS30, CCT2, M…	C7vsC0	Mock
393	DC.M3.6_Cytotoxic/NK Cell	0.000200682	0.00154913	0.697471	2.2771	0	44	IFNG, ZNF683, GZMA, CD160, GZMM, FGFBP2, KLRK1, TSEN54, NKG7, CD8A, FASLG, FCRL6, PRSS23, GZMH, PPP2R2B, GNLY, KLRG1, KLRF1, CTSW, SAMD3, SBK1, KLRC3, IL2RB, NCR3, GPR68, NCALD, PLEKHF1, CLIC3	C7vsC0	Mock
394	DC.M4.1_T cell	0.000202224	0.00154913	0.592488	2.01465	0	54	TRAT1, TCEA3, SELM, LRRN3, CD248, EDAR, DHRS3, STMN3, MAL, ID3, EPHX2, TMEM204, CCDC64, FAM84B, CD3E, PASK, BACH2, FAIM3, SH3YL1, LTBP3, TCF7, SLC16A10, OXNAD1, KLHL3, CCR7, AXIN2, CD28, GAL3ST4, MAN1C1, HPCAL4, GPR183, TBC1D4, HOOK1, CD40LG, FAM134B, TESPA1, ARMCX2, TNFRSF25	C7vsC0	Mock
395	DC.M4.2_Inflammation	0.000199561	0.00154913	-0.809338	-2.54925	0	39	FKBP5, MMP9, IL1R2, CR1, KREMEN1, MGAM, ANXA3, ALPL, IRAK3, PGLYRP1, OSM, SIPA1L2, WDFY3, LRG1, MCTP2, CASP5, CLEC4D, SOCS3, PLIN4, FCAR, SLPI, VNN1, CYSTM1, TLR5, VNN2, SERPINA1, IL18R1, IL18RAP, MAPK14, GPR141, S100P, OPLAH, GRB10, LIMK2	C7vsC0	Mock
396	DC.M4.3_Protein Synthesis	0.000200602	0.00154913	0.746859	2.36408	0	38	RPL26, RPL9, LRRC75A-AS1, RPS18, EEF1B2, RPS20, TOMM7, RPS27A, RPS14, C19orf70, RPL17, RPS13, RPS3, RPS5, RPL36, ZFAND1, RPL12, RPL5, RPL14, RPL22, TMEM42, BOD1, SNRPD2, ZNF32, RPL4, RPS4X, ZNF22	C7vsC0	Mock
397	DC.M4.6_Inflammation	0.000194628	0.00154913	-0.690644	-2.62133	0	109	LRRK2, C9orf66, ZCCHC6, RALB, DIP2B, IFITM2, CD97, LYN, FAM65B, FCGR2A, SLCO3A1, LAMP2, LITAF, ATG7, JDP2, MEFV, SNX27, APAF1, SBNO2, FTH1, ITPRIP, CFLAR, ATF6, P2RY13, CTNNA1, SNX10, STAT3, PHF21A, USP15, PRKCD, ETV6, MLKL, PCNX, MIDN, FAM160B1, ZFP36, SELL, RNASEL, IFNGR1, RNF13, APBB1IP, CDK14, NT5C2, LAT2, ALOX5AP, IFNGR2, SQRDL, SLC25A44, IFNAR1, CHSY1, GLIPR2, STAT5B, RIT1, RAB24, NCSTN, YI…	C7vsC0	Mock
398	DC.M4.7_Cell Cycle	0.00142334	0.0075488	0.453934	1.71395	6	95	PEX3, IFT74, SLAIN1, POP5, ARMC1, LANCL1, NOC3L, TMEM116, ASF1A, ZNF529, HIBADH, ZNF84, ARL14EP, FAM35A, CYP4V2, CLEC2D, BMI1, ZNF559, PURA, ZMYND11, TRAF5, NPAT, AKAP11, URI1, TSHZ1, CDC25B, EXOSC5, SLC39A10, TMEM109, GLOD4, ZNF721, NIFK, BUB3, ABCE1, TSR1, CASD1, RRN3, ZNF337, DOCK10, WWP1, SLC25A36, TYW3, POGLUT1, COQ10A, CEP290, C12orf29, CA5B, ZZZ3, NT5DC1, LPIN1, WDR36, SUPV3L1, PREPL, MPRI…	C7vsC0	Mock
399	DC.M4.10_B cell	0.00180505	0.00864679	0.616974	1.86043	8	30	FCRL1, KIAA0125, STAP1, FCER2, TSPAN13, FAM129C, VPREB3, CD79B, CD19, TCL1A, CD72, BLNK, CNTNAP2, HLA-DOA, SPIB, MS4A1, CD79A, AFF3, OSBPL10	C7vsC0	Mock
400	DC.M4.11_Plasma Cells	0.000806289	0.00460515	-0.928264	-1.7611	3	5	IGJ, TNFRSF17, TXNDC5, GLDC, CD38	C7vsC0	Mock
401	DC.M4.13_Inflammation	0.000195427	0.00154913	-0.795721	-2.84931	0	76	SMAP2, FAM129A, SSH2, MXD1, HLX, CXCR2, EMR2, PTEN, ASAP1, PFKFB4, FPR1, VNN3, SVIL, IL13RA1, CEP19, MTMR3, CXCR1, FRAT1, PANX2, ACOX1, CXCL1, XPO6, FOS, TLE3, ACTN1, GAB2, CHST15, MBOAT7, SIRPB1, PELI1, LAMP2, SDCBP, SLC6A6, NUMB, PACSIN2, TBC1D14, NLRP12, SLC19A1, FAM53C, DENND3, RRAGD, TREML2, DOCK5, ZDHHC18, FRAT2, PDLIM7, NCF4, CTBS, AGPAT9, DENND5A, LRP10, TSEN34, SKAP2, LPPR2, IL1B, P2RY13…	C7vsC0	Mock
402	DC.M4.15_T cells	0.000200723	0.00154913	0.631001	2.03162	0	41	CD7, SH2D1A, SIGIRR, ZAP70, LCK, GPR18, MTX3, LDHB, CD247, TRMT11, ITM2A, BIN1, GZMK, SKAP1, SIRPG, LY9, OCIAD2, MORC4, RASGRP1, CD5, TC2N, S1PR1, ARL4C, CD6, PLCG1, DYRK2, THEMIS, LBH, NMT2, CHMP7, PRKCQ, CD27, CD2, ZNF831	C7vsC0	Mock
403	DC.M5.1_Inflammation	0.00019084	0.00154913	-0.560574	-2.34693	0	228	ANTXR2, PTAFR, SLC12A6, ATP6V1B2, CCND3, LPGAT1, ZNF106, HK2, ANKS1A, KLHL8, CAB39, IRF2BPL, NDEL1, PARP4, E2F3, GNS, FOSL2, KIAA0040, CMTM6, PRKAR1A, TUBA1A, ARID3A, USP9X, ARHGAP19, PTBP3, GNA13, USP3, PRCP, GSK3B, SERPINB8, SLC30A1, CLIP1, TMEM2, TRIOBP, PXN, NRD1, NIN, MAPK1, SLC15A3, PGM2, PIK3CB, PRR13, FYB, OS9, RASSF3, TM9SF2, TMEM185B, FLII, LOXL3, ZSWIM6, DSE, RENBP, GADD45G, FKBP1A, MA…	C7vsC0	Mock
404	DC.M5.6_Mitochondrial Stress / Proteasome	0.000204834	0.00154913	0.450619	1.79237	0	136	YAE1D1, NDUFAF6, COX6C, STAMBPL1, SLIRP, UPF3B, ARV1, MRPL13, ACTR6, NDUFS4, PBDC1, CCDC91, METTL5, BET1, KANK1, MRPS28, SUB1, ESD, LSM8, CSTF2, PSMA2, ACAA2, PCGF6, DNAAF2, SLC39A8, C14orf166, NUCB2, DTWD1, C12orf43, ATAD1, CCDC109B, PDCD5, CD69, SSBP1, KIAA1279, DNAJC15, RBM26, RPF1, MAPK9, PCGF1, RBM34, MITD1, TRMT10C, FOPNL, PTGER2, BFAR, ABRACL, NFU1, PSMC2, LIAS, DYNLT3, DSTN, RBMX, KIAA039…	C7vsC0	Mock
405	DC.M5.7_Inflammation	0.000194856	0.00154913	-0.682295	-2.66519	0	132	IGF2R, TMCC3, CPD, FAM49A, TBL1X, IQGAP1, PLXDC2, RGS18, UBR2, ATP6V1A, ADAM19, CD93, NCOA1, CBL, MANBA, CXCL16, CDK5R1, AMICA1, EXTL3, EGLN1, PISD, IDS, TMX4, KIAA0513, HPSE, KIAA0232, CPQ, MAP2K4, ZNF746, CORO1C, CELF2, BICD2, MAP4K4, RAF1, ATXN1, MAP3K2, MBP, HSD17B11, FNIP1, SULT1A1, HSDL2, ACAP2, ZBTB34, KLHL21, PRDM8, RNASET2, SLC44A2, STXBP5, VCPKMT, UBE4B, RFWD2, SPAG9, HMGCR, CD46, TMCO3…	C7vsC0	Mock
406	DC.M5.9_Protein Synthesis	0.000201898	0.00154913	0.707223	2.41442	0	55	RPL39, RPL31, RPS29, RPS15A, RPS27, RPL27, RPS25, RPL35A, RPS24, RPS3A, RPS10, RPL30, RPL11, PFDN5, RPL32, FAU, RPS16, RPS8, RPS12, RPL8, RPL38, RPS11, RPS19, RPLP2, YBEY, RORA, RPLP0, ZCCHC7, RPS28	C7vsC0	Mock
407	DC.M5.10_Mitochondrial Respiration	0.000208638	0.00154913	0.40534	1.7104	0	218	TMEM126A, NDUFAF5, MRPL22, GTSF1, ERH, PPIL3, MRPL14, CISH, NDUFS5, SLC50A1, THYN1, C4orf27, C11orf73, NASP, MDP1, NDUFB2, NUDT2, SPAG7, NDUFS3, SSB, SUSD3, ZNRD1, C19orf53, NDUFA13, EEF1D, MRPL20, ATP5J, NDUFA3, CCDC12, MRPS9, SNAPC3, TOMM22, RPUSD3, PAGR1, TACO1, SNRPA, CLPP, MED10, NUBP1, ARPC5L, MRPL41, CDK2AP2, MRPL23, GNL1, DAP3, BCAT2, SMARCE1, SEC22A, C1orf50, SLC25A25, TRAPPC4, SNRNP40, …	C7vsC0	Mock
408	DC.M5.12_Interferon	0.000590203	0.00367347	-0.55931	-1.90707	2	57	ASPRV1, ETV7, LHFPL2, ABCA1, ZNFX1, DHRS9, TMEM140, NTNG2, TRANK1, TRIM25, TDRD7, ADAR, NMI, IFI16, RFWD2, ZC3HAV1, SP100, HSH2D, UNC93B1, NBN, ACTA2, GBP2, RNF213, CASP1, TAP1, NT5C3A, TYMP, SP110, IRF9, REC8, TCN2, SRBD1, TRIM21, TAP2	C7vsC0	Mock
409	DC.M5.15_Neutrophils	0.000198728	0.00154913	-0.793835	-2.13864	0	20	TCN1, ELANE, MS4A3, DEFA4, ARG1, CEACAM6, AZU1, LTF, BPI, CEACAM8, EIF1AY, HP, MPO	C7vsC0	Mock
410	DC.M6.6_Apoptosis / Survival	0.00039604	0.00259298	-0.64042	-2.11092	1	48	SERPINB2, TRPV4, SIPA1L1, MAP3K6, ANG, NACC2, EMILIN2, SLC43A2, MOB3A, C3AR1, OSGIN1, MARCO, EXT1, TNFSF13, CD14, BCKDK, CIDEB, TPD52L2, ST3GAL2, RAB32, GAPT, TSPO, SLC9A1, TNFRSF1B, DEDD2, FCN1, DUSP3, GABARAP, CALML4, FADD	C7vsC0	Mock
411	DC.M6.12_Mitochondrial Stress	0.000606061	0.00367347	0.507217	1.81037	2	69	NDUFAF2, RAD51C, C12orf45, GEMIN2, HSPE1, NDUFAF4, BYSL, LSM5, UQCC2, CCDC106, GLMN, RITA1, ITGB3BP, ZNF544, ZNF260, BOLA3, RPL3, NOP58, RPL23A, APOA1BP, TRIM32, GPX7, POLR3E, MRPL40, NARS2, C19orf48, MAGEH1, IMPDH2, SEH1L, C1QBP, FAM3C, CTPS1, CAD, AVEN, IPO4	C7vsC0	Mock
412	DC.M6.13_Cell Death	0.000199243	0.00154913	-0.684102	-2.21084	0	44	CARD6, TMEM154, RASGRP4, FNDC3B, LILRB3, UBN1, HSPA6, LAMP2, CPEB4, NLRC4, MNDA, LILRA2, TBC1D8, PLAUR, NCF1, SLC36A1, PILRA, HIST1H2BC, PLIN3, SIGLEC9, STK3, LRRC25, NTSR1, VASP, FES, NLRP3, BAZ1A, BCL3, STX11, EIF4E3, HK3, CLEC12A, SERPINB1, RAB20, POLR2J3	C7vsC0	Mock
413	DC.M7.1_Inflammation	0.000191791	0.00154913	-0.584783	-2.36522	0	172	SH3PXD2B, TSC22D3, PTEN, GSN, HRH2, RAB3D, APOBR, TLN1, PREX1, FAM45A, ARHGAP26, RASSF2, MYADM, MYH9, AMPH, SLC16A5, RTN2, TALDO1, CHD7, MAP3K5, ACPP, TIMP2, NCF2, SLC9A8, AGO4, MFN2, MED12, ARHGEF11, SIRPB2, KDM4B, SYK, PAM, SEMA4B, PICALM, MSRA, TMEM127, TK2, XRN2, BCORL1, IMPDH1, MSN, RARA, ZNF213, PPP1R15A, TESK2, DPYD, DENND1A, G6PD, ULK1, CAP1, UBA1, CDKN2D, TNIP1, WAS, SH3BP5L, CTSA, LSP1,…	C7vsC0	Mock
