# Supplementary material for: Distinct immune responses associated with vaccination status and protection outcomes after malaria challenge
Source: PLoS Pathog. 2023 May 17;19(5):e1011051. doi: 10.1371/journal.ppat.1011051 (PMC10228810; doi:10.1371/journal.ppat.1011051)
Supplement: S2 Table — Four different staining panels were used for the detection of T cell, NK and unconventional T cell, DC, and B cell. (XLSX) [file ppat.1011051.s002.xlsx]

## Sheet: Table S1
S2 Table. List of antibodies used for flow cytometry experiment. Four different staining panels were used for the detection of T cell, NK and unconventional T cell, DC, and B cell.
T cell panel					NK cell and unconventional T cell panel					DC panel					B cell panel
Marker	Fluorochrome	Clone	Vendor		Marker	Fluorochrome	Clone	Vendor		Marker	Fluorochrome	Clone	Vendor		Marker	Fluorochrome	Clone	Vendor
CD3	BUV395	UCHT1	BD Bioscience		CD16	BUV395	3G8	BD Bioscience		CD40	BUV395	5C3	BD Bioscience		CD11c	BUV395	b-ly6	BD Bioscience
Viability	Live/Dead Blue		ThermoFisher		Viability	Live/Dead Blue		ThermoFisher		Viability	Live/Dead Blue		ThermoFisher		Viability	Live/Dead Blue		ThermoFisher
CD56	BUV563	NCAM16.2	BD Bioscience		CD3	BUV496	UCHT1	BD Bioscience		CD16	BUV496	3G8	BD Bioscience		CD19	BUV496	SJ25C1	BD Bioscience
HLA-DR	BUV661	G46-6	BD Bioscience		CD19	BUV563	SJ25C1	BD Bioscience		CD56	BUV563	NCAM16.2	BD Bioscience		CD38	BUV661	HIT2	BD Bioscience
CD14	BUV737	M5E2	BD Bioscience		HLA-DR	BUV661	G46-6	BD Bioscience		CD3	BUV661	UCHT1	BD Bioscience		IgG	BUV737	G18-145	BD Bioscience
CD4	BUV805	SK3	BD Bioscience		CD27	BUV737	L128	BD Bioscience		CD86	BUV737	FUN-1	BD Bioscience		CD3	BUV805	UCHT1	BD Bioscience
PD-1	BV421	EH12.2H7	Biolegend		CD8	BUV805	SK1	BD Bioscience		CD45	BUV805	HI30	BD Bioscience		CD80	BV421	L307.4	BD Bioscience
CD25	BV480	M-A251	BD Bioscience		TCRgd	BV421	11F2	BD Bioscience		CX3CR1	BV421	2A9-1	BD Bioscience		BAFFR	BV480	11C	BD Bioscience
CD45RA	BV570	HI100	Biolegend		NKG2D	BV480	1D11	BD Bioscience		CD85k	BV480	ZM3.8	BD Bioscience		IgM	BV570	MHM-88	Biolegend
CXCR5	BV605	J252D4	Biolegend		CD56	BV570	HCD56	Biolegend		CD45RA	BV570	HI100	Biolegend		CD5	BV605	UCHT2	BD Bioscience
CD69	BV650	FN50	BD Bioscience		Vd2 TCR	BV605	B6	BD Bioscience		CD141	BV605	1A4	BD Bioscience		CD86	BV650	FUN1	BD Bioscience
Tbet	BV711	4B10	Biolegend		CD38	BV650	HB-7	Biolegend		CD172a	BV650	SE5A5	BD Bioscience		CD21	BV711	b-ly4	BD Bioscience
CD19	BV750	HIB19	Biolegend		CD57	BV711	HNK-1	Biolegend		CD14	BV711	MφP9	BD Bioscience		CD19	BV750	HIB19	Biolegend
CD127	BV786	A019D5	Biolegend		CD4	BV750	SK3	BD Bioscience		CD11b	BV750	icrf44	BD Bioscience		IgD	BV786	IA6-2	Biolegend
Ki-67	Ax488	B56	BD Bioscience		TCRva7.2	BV786	3C10	Biolegend		CD123	BV786	7G3	BD Bioscience		GL7	FITC	GL7	Biolegend
CD38	BB700	HIT2	BD Bioscience		FCεRI𝛾	FITC	Polyclonal	EMD millipore		CD26	FITC	M-A261	BD Bioscience		PD-L2	BB700	MIH18	BD Bioscience
CXCR6	PE	K041E5	Biolegend		Ki-67	BB660	B56	BD Bioscience		CD272	BB630	J168-540	BD Bioscience		FCRL5	PE	509f6	Biolegend
FOXP3	PE-CF594	259D/C7	BD Bioscience		CD14	PerCP-Cy5.5	MΦP9	BD Bioscience		CD8	BB660	RPA-T8	BD Bioscience		CD24	PE-CF594	ML5	BD Bioscience
CTLA-4	PE-Cy5	BNI3	BD Bioscience		CD127	BB790	HIL-7R-M21	BD Bioscience		CD32	BB700	FLI8.26	BD Bioscience		CD27	PE-Cy5	O323	ThermoFisher
Lag3	PE-Cy7	11C3C65	Biolegend		NKp46	PE	9E2/NKp46	BD Bioscience		CD38	BB790	HIT2	BD Bioscience		IgA	PE-vio770	IS11-8E10	Miltenyi Biotec
CXCR3	APC	G025H7	Biolegend		CRTh2	PE-CF594	BM16	BD Bioscience		CCR7	PE	G043H7	Biolegend		FCRL4	APC	413D12	Biolegend
CD8	Ax700	RPA-T8	BD Bioscience		CD33	PE-Cy5	WM53	Biolegend		CD163	PE-CF594	GHI/61	BD Bioscience		Ki-67	Ax700	Ki67	Biolegend
CCR7	APC-Cy7	G043H7	Biolegend		c-kit	PE-Cy5.5	104D2	Thermo Fisher		CD80	PE-Cy5	B7-1	BD Bioscience		HLA-DR	APC-Cy7	L243	Biolegend
					NKG2A	PE-Cy7	Z199	Beckman		CD19	PE-Cy5.5	SJ25-C1	ThermoFisher
					CD337/Nkp30	APC	AF29-4D12	Miltenyi Biotec		CD4	PE-Cy7	SK3	BD Bioscience
					NKG2C	Ax700	134591	R&D Systems		CD1c	Ax647	F10/21A3	BD Bioscience
					CD161	APC-Fire750	HP-3G10	Biolegend		CD11c	Ax700	B-ly6	BD Bioscience
										HLA-DR	APC-H7	G46-6	BD Bioscience
